# Supplementary material for: Chemodivergent (4 + 3) cycloadditions of 2-indolylmethanols with 1,3,5-triazinanes: access to polycyclic indoles
Source: Royal Society of Chemistry journal article supplement (doi:10.1039/d4qo00657g), 2024-01-01
Supplement: d4qo00657g1.pdf [file d4qo00657g1.pdf]

## *Supporting Information*

### Contents

|                                                                                                |     |
|------------------------------------------------------------------------------------------------|-----|
| 1. General methods .....                                                                       | S2  |
| 2. Representative procedures .....                                                             | S3  |
| 3. Characterization of products <b>3</b> , <b>4</b> and <b>5'</b> .....                        | S10 |
| 4. X-ray single crystal data for compounds <b>3a</b> , <b>3b</b> , <b>4b</b> , <b>5d</b> ..... | S28 |
| 5. NMR spectra .....                                                                           | S32 |
| 6. References .....                                                                            | S89 |

## 1. General Methods

Unless otherwise specified, all reactions were conducted under an atmospheric atmosphere and anhydrous conditions. All the solvents were purified according to the standard procedures. All chemicals which are commercially available were employed without further purification. Thin-layer chromatography (TLC) was performed on silica gel plates (60F-254) using UV-light (254 nm). Flash chromatography was conducted on silica gel (200–300 mesh).  $^1\text{H}$  and  $^{13}\text{C}$  NMR spectra were recorded at ambient temperature in  $\text{CDCl}_3$  or DMSO on a 400 MHz NMR spectrometer. Chemical shifts were reported in parts per million (ppm). The data are reported as follows: for  $^1\text{H}$  NMR, chemical shift in ppm from tetramethylsilane with the solvent as internal standard ( $\text{CDCl}_3$   $\delta$  7.26 ppm), (DMSO  $\delta$  2.50 ppm), multiplicity (s = singlet, d = doublet, t = triplet, q = quartet, m = multiplet or overlap of non-equivalent resonances), integration; for  $^{13}\text{C}$  NMR, chemical shift in ppm from tetramethylsilane with the solvent as internal indicator ( $\text{CDCl}_3$   $\delta$  77.1 ppm), (DMSO  $\delta$  39.5 ppm), multiplicity with respect to protons. All high-resolution mass spectra were obtained on a Q-TOF Micro LC/MS System ESI spectrometer to be given in m/z. 2-Indolylmethanols **1** were either employed directly from commercial sources or prepared according to the literatures<sup>1-4</sup>, 1,3,5-triazinanes **2** were synthesized according to modified literature reported procedure<sup>5</sup>.

## 2. Representative Procedures

### Optimization of the reaction conditions for 3b

#### 1) Effect of Solvents

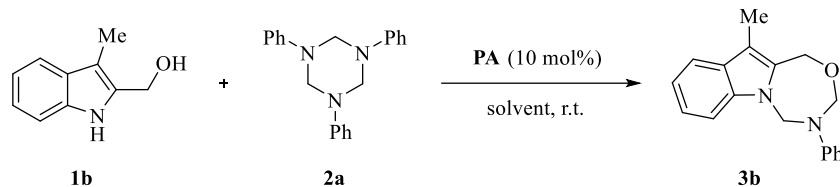

| Entry <sup>a</sup> | Cat.      | Solvent                         | Yield (%) <sup>b</sup> |
|--------------------|-----------|---------------------------------|------------------------|
| 1                  | <b>PA</b> | Toluene                         | 37                     |
| 2                  | <b>PA</b> | CH <sub>2</sub> Cl <sub>2</sub> | 68                     |
| 3                  | <b>PA</b> | CH <sub>3</sub> CN              | 82                     |
| 4                  | <b>PA</b> | THF                             | 40                     |
| 5 <sup>c</sup>     | <b>PA</b> | CH <sub>3</sub> CN              | 30                     |
| 6 <sup>d</sup>     | <b>PA</b> | CH <sub>3</sub> CN              | 81                     |

<sup>a</sup>Reaction conditions: **1b** (0.2 mmol), **2a** (0.12 mmol), and the **PA** (10 mol%) in the solvent specified (1 mL) at r.t. for 10 minutes.

<sup>b</sup>Isolated yield.

<sup>c</sup>**2a** (0.06 mmol)

<sup>d</sup>**2a** (0.2 mmol)

#### 2) Effect of Catalysts

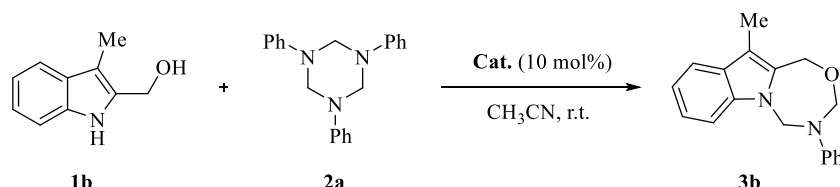

| Entry <sup>a</sup> | Cat.                      | Solvent            | Yield (%) <sup>b</sup> |
|--------------------|---------------------------|--------------------|------------------------|
| 1                  | <b>PA</b>                 | CH <sub>3</sub> CN | 82                     |
| 2                  | <b>TfOH</b>               | CH <sub>3</sub> CN | n.r.                   |
| 3                  | <b><i>p</i>-TSA</b>       | CH <sub>3</sub> CN | 69                     |
| 4                  | <b>MsOH</b>               | CH <sub>3</sub> CN | n.r.                   |
| 5                  | <b>HNTf<sub>2</sub></b>   | CH <sub>3</sub> CN | 42                     |
| 6                  | <b>PhCOOH</b>             | CH <sub>3</sub> CN | 58                     |
| 7                  | <b>CH<sub>3</sub>COOH</b> | CH <sub>3</sub> CN | 50                     |

<sup>a</sup>Reaction conditions: **1b** (0.2 mmol), **2a** (0.12 mmol), and the **Cat.** (10 mol%) in the CH<sub>3</sub>CN (1 mL) at r.t. for 10 minutes. n.r.= no reaction.

<sup>b</sup>Isolated yield.

### 3) Effect of Temperatures

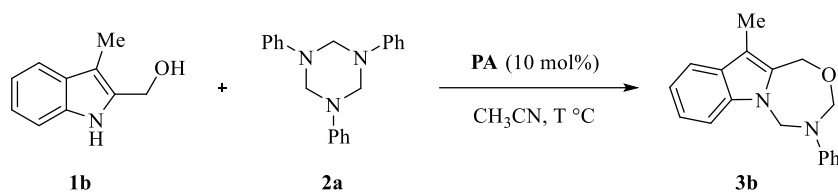

| Entry <sup>a</sup> | T (°C) | Solvent            | Yield (%) <sup>b</sup> |
|--------------------|--------|--------------------|------------------------|
| 1                  | r.t.   | CH <sub>3</sub> CN | 82                     |
| 2                  | 0      | CH <sub>3</sub> CN | 78                     |
| 3                  | -20    | CH <sub>3</sub> CN | 66                     |
| 4                  | -40    | CH <sub>3</sub> CN | 63                     |
| 5                  | 50     | CH <sub>3</sub> CN | 46                     |

<sup>a</sup>Reaction conditions: **1b** (0.2 mmol), **2a** (0.12 mmol), and the **PA** (10 mol%) in the CH<sub>3</sub>CN (1 mL) at T (°C) for 10 minutes.

<sup>b</sup>Isolated yield.

### Optimization of the reaction conditions for 4b

#### 1) Effect of Solvents

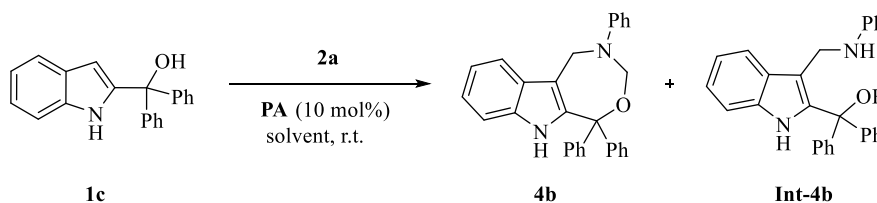

| Entry <sup>a</sup> | Solvent                         | Yield (%) <sup>b</sup> |               |
|--------------------|---------------------------------|------------------------|---------------|
|                    |                                 | <b>4b</b>              | <b>Int-4b</b> |
| 1                  | Toluene                         | 33                     | 21            |
| 2                  | CH <sub>2</sub> Cl <sub>2</sub> | 37                     | 48            |
| 3                  | CH <sub>3</sub> CN              | 79                     | -             |
| 4                  | THF                             | 48                     | 16            |

<sup>a</sup>Reaction conditions: **1c** (0.2 mmol), **2a** (0.12 mmol), and the **PA** (10 mol%) in the solvent specified (1 mL) at r.t. for 10 minutes.

<sup>b</sup>Isolated yield.

#### 2) Effect of Catalysts

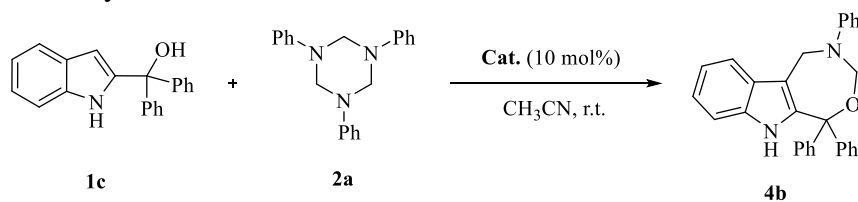

| Entry <sup>a</sup> | Cat.                       | Solvent            | Yield (%) <sup>b</sup> |
|--------------------|----------------------------|--------------------|------------------------|
| 1                  | <b>TFA</b>                 | CH <sub>3</sub> CN | trace                  |
| 2                  | <b>TfOH</b>                | CH <sub>3</sub> CN | 26                     |
| 3                  | <b><i>p</i>-TSA</b>        | CH <sub>3</sub> CN | 39                     |
| 4                  | <b>MsOH</b>                | CH <sub>3</sub> CN | trace                  |
| 5                  | <b>HNTf<sub>2</sub></b>    | CH <sub>3</sub> CN | trace                  |
| 6                  | <b>PhCOOH</b>              | CH <sub>3</sub> CN | n.r.                   |
| 7                  | <b>CH<sub>3</sub>COOH</b>  | CH <sub>3</sub> CN | trace                  |
| 8                  | <b>PA</b>                  | CH <sub>3</sub> CN | 79                     |
| 9                  | <b>Ni(OTf)<sub>2</sub></b> | CH <sub>3</sub> CN | 32                     |
| 10                 | <b>Sc(OTf)<sub>3</sub></b> | CH <sub>3</sub> CN | trace                  |
| 11                 | <b>Fe(OTf)<sub>2</sub></b> | CH <sub>3</sub> CN | n.r.                   |
| 12                 | <b>Cu(OTf)<sub>2</sub></b> | CH <sub>3</sub> CN | 29                     |
| 13                 | <b>Sn(OTf)<sub>2</sub></b> | CH <sub>3</sub> CN | n.r.                   |
| 14                 | <b>Zn(OTf)<sub>2</sub></b> | CH <sub>3</sub> CN | n.r.                   |
| 15                 | <b>In(OTf)<sub>3</sub></b> | CH <sub>3</sub> CN | n.r.                   |
| 16                 | <b>Co(OTf)<sub>2</sub></b> | CH <sub>3</sub> CN | n.r.                   |

<sup>a</sup>Reaction conditions: **1c** (0.2 mmol), **2a** (0.12 mmol), and the **Cat.** (10 mol%) in the CH<sub>3</sub>CN (1 mL) at r.t. for 10 minutes. n.r.= no reaction.

<sup>b</sup>Isolated yield.

## Optimization of the reaction conditions for Int-4d

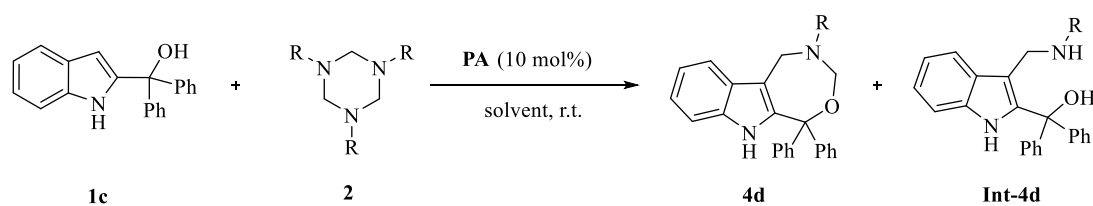

### 1) Effect of Solvents

| Entry <sup>a</sup> | Solvent                         | Yield (%) <sup>b</sup> |               |
|--------------------|---------------------------------|------------------------|---------------|
|                    |                                 | <b>4d</b>              | <b>Int-4d</b> |
| 1                  | Toluene                         | 31                     | 42            |
| 2                  | CH <sub>2</sub> Cl <sub>2</sub> | 32                     | 57            |
| 3                  | CH <sub>3</sub> CN              | 71                     | -             |
| 4                  | THF                             | 40                     | 34            |
| 5                  | CHCl <sub>3</sub>               | 30                     | 44            |
| 6                  | DCE                             | 36                     | 40            |

<sup>a</sup>Reaction conditions: **1c** (0.2 mmol), **2** (0.06 mmol), and the **PA** (10 mol%) in the solvent specified (1 mL) at r.t. for 12 hours. R = 4-ClPh.

<sup>b</sup>Isolated yield.

## 2) Effect of Catalysts

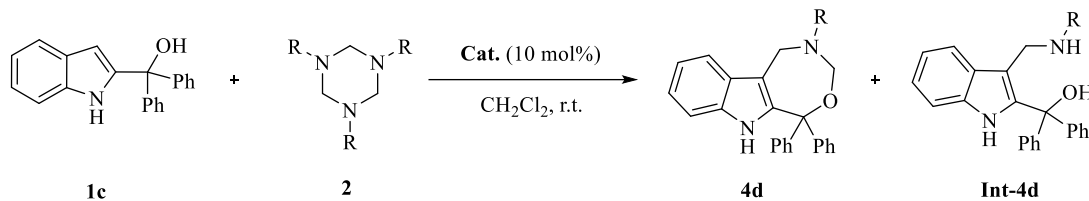

| Entry <sup>a</sup> | Cat.                       | Yield (%) <sup>b</sup> |        |
|--------------------|----------------------------|------------------------|--------|
|                    |                            | 4d                     | Int-4d |
| 1                  | <b>TFA</b>                 | 29                     | trace  |
| 2                  | <b>TfOH</b>                | 37                     | 23     |
| 3                  | <b><i>p</i>-TSA</b>        | trace                  | -      |
| 4                  | <b>MsOH</b>                | trace                  | -      |
| 5                  | <b>HNTf<sub>2</sub></b>    | 39                     | 42     |
| 6                  | <b>PhCOOH</b>              | 24                     | 36     |
| 7                  | <b>CH<sub>3</sub>COOH</b>  | 28                     | 52     |
| 8                  | <b>PA</b>                  | 32                     | 57     |
| 9                  | <b>Ni(OTf)<sub>2</sub></b> | 29                     | 33     |
| 10                 | <b>Sc(OTf)<sub>3</sub></b> | 21                     | 38     |
| 11                 | <b>Fe(OTf)<sub>2</sub></b> | -                      | -      |
| 12                 | <b>Co(OTf)<sub>2</sub></b> | 19                     | 31     |
| 13                 | <b>Cu(OTf)<sub>2</sub></b> | 40                     | 29     |

<sup>a</sup>Reaction conditions: **1c** (0.2 mmol), **2** (0.06 mmol), and the **Cat.** (10 mol%) in the CH<sub>2</sub>Cl<sub>2</sub> (1 mL) at r.t. for 12 hours. R = 4-ClPh.

<sup>b</sup>Isolated yield.

## Optimization of the reaction conditions for 5d

### 1) Effect of Solvents

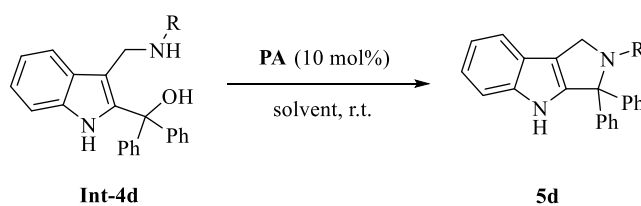

| Entry <sup>a</sup> | Cat. | Solvent                         | Time (h) | Yield (%) <sup>b</sup> | Time (h) | Yield (%) <sup>b</sup> |
|--------------------|------|---------------------------------|----------|------------------------|----------|------------------------|
| 1                  | PA   | Toluene                         | 24       | 38                     | 36       | 39                     |
| 2                  | PA   | CH <sub>2</sub> Cl <sub>2</sub> | 24       | 42                     | 36       | 43                     |
| 3                  | PA   | CH <sub>3</sub> CN              | 24       | 41                     | 36       | 41                     |
| 4                  | PA   | THF                             | 24       | 33                     | 36       | 45                     |

<sup>a</sup>Reaction conditions: **Int-4d** and the **PA** (10 mol%) in the solvent specified (1 mL) at r.t. for specific time. R = 4-ClPh.

<sup>b</sup>Isolated yield.

## 2) Effect of Temperatures

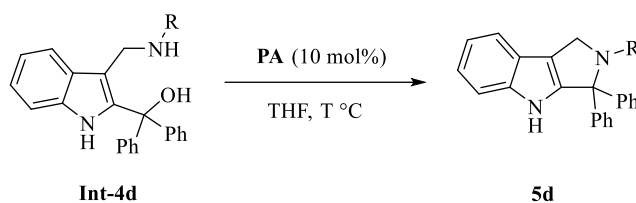

| Entry <sup>a</sup> | T (°C) | Time (h) | Yield (%) <sup>b</sup> | Time (h) | Yield (%) <sup>b</sup> | Time (h) | Yield (%) <sup>b</sup> |
|--------------------|--------|----------|------------------------|----------|------------------------|----------|------------------------|
| 1                  | r.t.   | 12       | trace                  | 24       | 33                     | 36       | 45                     |
| 2                  | 40     | 12       | 25                     | 24       | 55                     | 36       | 54                     |
| 3                  | 60     | 12       | messy                  | 24       | -                      | 36       | -                      |
| 4                  | 80     | 12       | messy                  | 24       | -                      | 36       | -                      |

<sup>a</sup>Reaction conditions: **Int-4d** and the **PA** (10 mol%) in the THF (1 mL) at specific T (°C) for specific time. R = 4-ClPh.

<sup>b</sup>Isolated yield.

## General procedure for the synthesis of triazine compounds 2

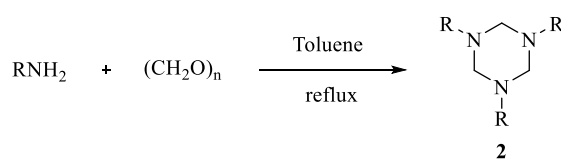

In a 100 mL round-bottomed flask equipped with a Dean-Stark apparatus, a mixture of aniline (30 mmol), paraformaldehyde (33 mmol), and toluene (50 mL) was heated with refluxing for 2 hours. Then the solvent was concentrated under reduced pressure at 50 °C, a precipitate came out from the mixture. The precipitate was collected by filtration, washed with *n*-hexane several times, and dried to obtain 1,3,5-triazinanes **2**.

## Procedure for the synthesis of compounds 3

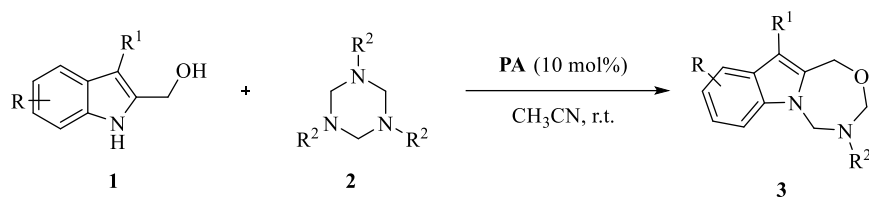

Compounds **1** (0.20 mmol) and 1,3,5-triazinanes **2** (0.12 mmol) were dissolved in  $\text{CH}_3\text{CN}$  and **PA** (10 mol%) was added. The reaction mixture was stirred at room temperature for 10 minutes. The solvents were removed in vacuo and the crude products were separated by flash column chromatography on silica gel (petroleum ether/ethyl acetate = 4:1) to afford target products **3**.

### Procedure for the synthesis of compounds **4**

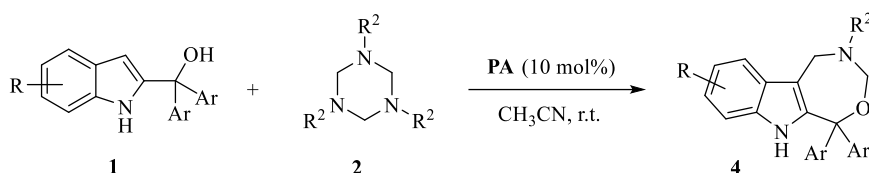

Diaryl 2-indolylmethanol compounds **1** (0.20 mmol) and 1,3,5-triazinanes **2** (0.12 mmol) were dissolved in  $\text{CH}_3\text{CN}$  and **PA** (10 mol%) was added. The reaction mixture was stirred at room temperature for 10 minutes. The solvents were removed in vacuo and the crude products were separated by flash column chromatography on silica gel (petroleum ether/ethyl acetate = 10:1) to afford target products **4**.

### Procedure for the synthesis of compounds **Int-4**

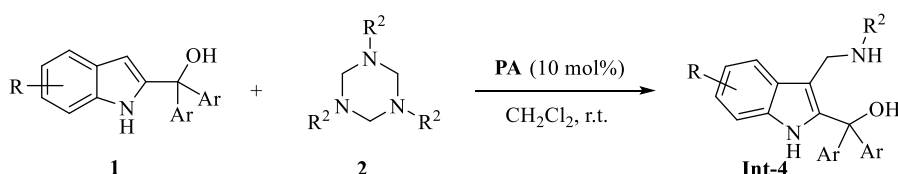

Diaryl 2-indolylmethanol compounds **1** (0.50 mmol) and 1,3,5-triazinanes **2** (0.15 mmol) were dissolved in  $\text{CH}_2\text{Cl}_2$  and **PA** (10 mol%) was added. The reaction mixture was stirred at room temperature for 12 hours. The solvents were removed in vacuo and the crude products were separated by flash column chromatography on silica gel (petroleum ether/ethyl acetate = 10:1) to afford products **Int-4**.

### Procedure for the synthesis of compounds **5**

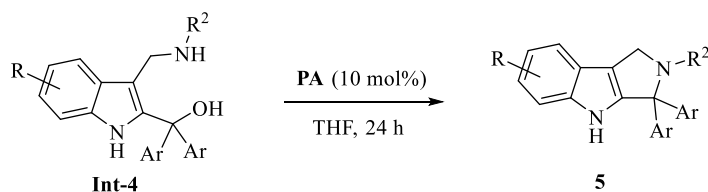



Compounds **Int-4** (0.20mmol) were dissolved in THF and **PA** (10 mol%) was added. The reaction mixture was stirred at 40 °C for 24 hours. The solvents were removed in vacuo and the crude products were separated by flash column chromatography on silica gel (petroleum ether/ethyl acetate = 15:1) to afford target products **5** and recover compounds **Int-4**, then recovered compounds **Int-4** were repeated the above steps four times.

### Procedure for the synthesis of compounds **5'**

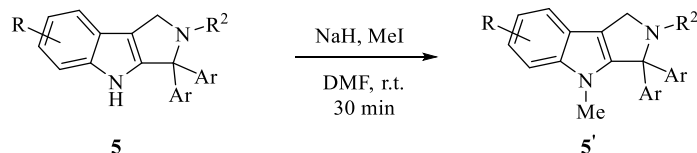

To the solution of compounds **5** (0.1 mmol) in DMF (1 mL) were added NaH (60% suspension in mineral oil, 0.15 mmol) at 0 °C, which was stirred at 25 °C for 30 minutes. Then iodomethane (0.156 mmol) was added to the reaction mixture at 0 °C, which was stirred at 25 °C for 30 minutes. After the completion of the reaction which was indicated by TLC, the organic layer was washed with saturated NH<sub>4</sub>Cl aqueous solution (3 × 10 mL), the combined organic layer was dried over anhydrous Na<sub>2</sub>SO<sub>4</sub>, filtered and concentrated under reduced pressure. The residues were purified through preparative thin layer chromatography on silica gel (petroleum ether/ethyl acetate = 15:1) to afford target products **5'**.

### Special substrate

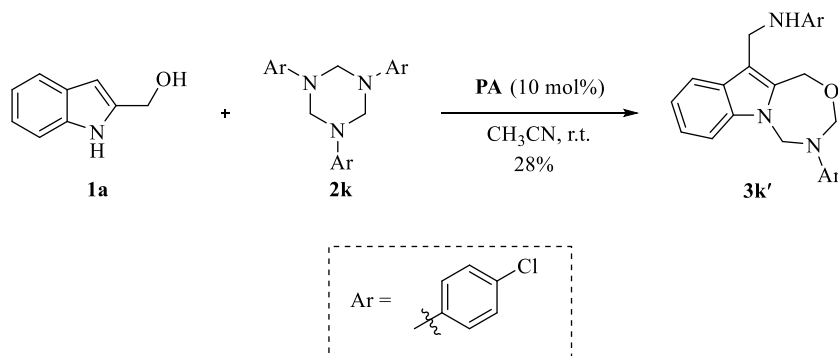

Compounds **1a** (0.20 mmol) and 1,3,5-triazinanes **2k** (0.20 mmol) were dissolved in CH<sub>3</sub>CN and **PA** (10 mol%) was added. The reaction mixture was stirred for 10 minutes at room temperature. The solvents were removed in vacuo and the crude product was separated by flash column chromatography on silica gel (petroleum ether/ethyl acetate = 4:1) to afford target products **3k'**.

### 3. Characterization of products

#### *N*-((4-phenyl-4,5-dihydro-1*H*,3*H*-[1,3,5]oxadiazepino[5,6-*a*]indol-11-yl)methyl)aniline **3a**:

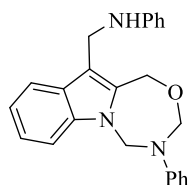

A white solid; 22.2 mg; isolated yield = 30%; m.p. 156.3 -157.2 °C; <sup>1</sup>H NMR (400 MHz, CDCl<sub>3</sub>) δ 7.61 – 7.50 (m, 1H), 7.38 – 7.30 (m, 1H), 7.26 – 7.16 (m, 3H), 7.14 – 7.08 (m, 2H), 7.07 – 7.01 (m, 3H), 6.87 – 6.78 (m, 1H), 6.74 – 6.69 (m, 1H), 6.66 – 6.61 (m, 2H), 5.76 (s, 2H), 5.23 (s, 2H), 4.98 (s, 2H), 4.33 (s, 2H), 3.61 (s, 1H). <sup>13</sup>C NMR (100 MHz, CDCl<sub>3</sub>) δ 148.4, 145.6, 136.5, 136.1, 129.3, 126.9, 122.8, 121.9, 119.7, 119.5, 118.0, 117.5, 112.8, 111.2, 108.7, 86.8, 64.1, 61.4, 38.7. HRMS (ESI) m/z calcd for C<sub>24</sub>H<sub>23</sub>N<sub>3</sub>ONa<sup>+</sup> [M + Na]<sup>+</sup> = 392.1733, found = 392.1732.

#### 11-Methyl-4-phenyl-4,5-dihydro-1*H*,3*H*-[1,3,5]oxadiazepino[5,6-*a*]indole **3b**:

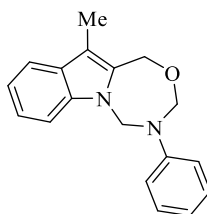

A white solid; 41.1 mg; isolated yield = 82%; m.p. 134.4 -135.2 °C; <sup>1</sup>H NMR (400 MHz, CDCl<sub>3</sub>) δ 7.47 – 7.38 (m, 1H), 7.30 – 7.24 (m, 1H), 7.21 – 7.14 (m, 1H), 7.11 – 7.03 (m, 2H), 7.03 – 6.97 (m, 3H), 6.85 – 6.68 (m, 1H), 5.66 (s, 2H), 5.19 (s, 2H), 4.89 (s, 2H), 2.21 (s, 3H). <sup>13</sup>C NMR (100 MHz, CDCl<sub>3</sub>) δ 145.7, 136.4, 134.2, 129.2, 128.1, 122.4, 121.7, 119.4, 118.9, 118.0, 109.7, 108.3, 86.7, 64.3, 61.2, 8.8. HRMS (ESI) m/z calcd for C<sub>18</sub>H<sub>18</sub>N<sub>2</sub>ONa<sup>+</sup> [M + Na]<sup>+</sup> = 301.1311, found = 301.1310.

#### 4-(2-Chlorophenyl)-11-methyl-4,5-dihydro-1*H*,3*H*-[1,3,5]oxadiazepino[5,6-*a*]indole **3c**:

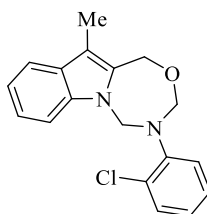

A white solid; 39.9 mg; isolated yield = 71%; m.p. 146.7 -147.2 °C; <sup>1</sup>H NMR (400 MHz, CDCl<sub>3</sub>) δ 7.47 – 7.40 (m, 1H), 7.31 – 7.26 (m, 1H), 7.20 – 7.13 (m, 1H), 7.09 – 7.01 (m, 2H), 7.00 – 6.94 (m, 1H), 6.92 – 6.79 (m, 2H), 5.72 (s, 2H), 5.06 (s, 2H), 5.01 (s, 2H), 2.31 (s, 3H). <sup>13</sup>C NMR (100 MHz, CDCl<sub>3</sub>) δ 143.5, 136.5, 134.2, 130.0, 129.0,

127.7, 127.7, 126.2, 126.1, 122.4, 119.1, 118.8, 109.8, 108.1, 89.5, 63.9, 61.5, 8.8. HRMS (ESI)  $m/z$  calcd for  $C_{18}H_{17}ClN_2ONa^+$   $[M + Na]^+ = 335.0922$ , found = 335.0919.

11-Methyl-4-(*m*-tolyl)-4,5-dihydro-1*H*,3*H*-[1,3,5]oxadiazepino[5,6-*a*]indole **3d**:

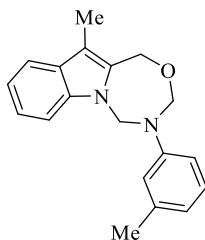

A white solid; 41.0 mg; isolated yield = 78%; m.p. 131.3 -131.9 °C;  $^1H$  NMR (400 MHz,  $CDCl_3$ )  $\delta$  7.49 – 7.40 (m, 1H), 7.33 – 7.26 (m, 1H), 7.23 – 7.15 (m, 1H), 7.09 – 6.94 (m, 2H), 6.87 – 6.78 (m, 2H), 6.67 – 6.55 (m, 1H), 5.72 (s, 2H), 5.23 (s, 2H), 4.93 (s, 2H), 2.23 (s, 3H), 2.16 (s, 3H).  $^{13}C$  NMR (100 MHz,  $CDCl_3$ )  $\delta$  145.5, 138.9, 136.4, 134.1, 129.0, 128.0, 122.4, 122.4, 119.4, 118.9, 118.6, 114.8, 109.7, 108.3, 86.6, 64.3, 61.2, 21.6, 8.8. HRMS (ESI)  $m/z$  calcd for  $C_{19}H_{20}N_2ONa^+$   $[M + Na]^+ = 315.1468$ , found = 315.1465.

4-(3-Chlorophenyl)-11-methyl-4,5-dihydro-1*H*,3*H*-[1,3,5]oxadiazepino[5,6-*a*]indole **3e**:

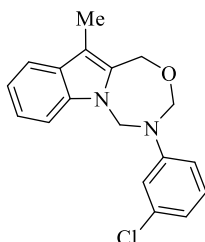

A white solid; 47.7 mg; isolated yield = 85%; m.p. 189.5 -190.1 °C;  $^1H$  NMR (400 MHz,  $CDCl_3$ )  $\delta$  7.49 – 7.40 (m, 1H), 7.32 – 7.26 (m, 1H), 7.24 – 7.17 (m, 1H), 7.08 – 7.02 (m, 2H), 7.01 – 6.96 (m, 1H), 6.92 – 6.85 (m, 1H), 6.79 – 6.71 (m, 1H), 5.70 (s, 2H), 5.19 (s, 2H), 4.93 (s, 2H), 2.23 (s, 3H).  $^{13}C$  NMR (100 MHz,  $CDCl_3$ )  $\delta$  146.8, 136.4, 134.9, 133.8, 130.1, 128.0, 122.6, 121.6, 119.5, 119.1, 118.1, 115.8, 110.2, 108.1, 86.3, 64.4, 61.1, 8.8. HRMS (ESI)  $m/z$  calcd for  $C_{18}H_{17}ClN_2ONa^+$   $[M + Na]^+ = 335.0922$ , found = 335.0928.

4-(3-Bromophenyl)-11-methyl-4,5-dihydro-1*H*,3*H*-[1,3,5]oxadiazepino[5,6-*a*]indole **3f**:

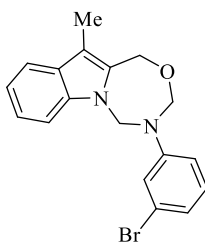

A white solid; 46.8 mg; isolated yield = 73%; m.p. 185.7 -186.2 °C;  $^1H$  NMR (400 MHz,  $CDCl_3$ )  $\delta$  7.50 – 7.42 (m, 1H), 7.35 – 7.26 (m, 1H), 7.25 – 7.18 (m, 2H), 7.10 – 7.01

(m, 1H), 6.97 – 6.87 (m, 3H), 5.70 (s, 2H), 5.19 (s, 2H), 4.93 (s, 2H), 2.23 (s, 3H). <sup>13</sup>C NMR (100 MHz, CDCl<sub>3</sub>) δ 147.0, 136.4, 133.8, 130.4, 128.0, 124.5, 123.1, 122.7, 121.0, 119.5, 119.1, 116.2, 110.2, 108.1, 86.3, 64.4, 61.1, 8.8. HRMS (ESI) m/z calcd for C<sub>18</sub>H<sub>17</sub>BrN<sub>2</sub>ONa<sup>+</sup> [M + Na]<sup>+</sup> = 379.0416, found = 379.0428.

4-(4-Methoxyphenyl)-11-methyl-4,5-dihydro-1*H*,3*H*-[1,3,5]oxadiazepino[5,6-*a*]indole **3g**:

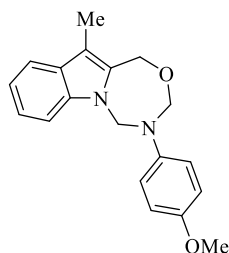

A white solid; 45.5 mg; isolated yield = 82%; m.p. 129.7-130.3 °C; <sup>1</sup>H NMR (400 MHz, CDCl<sub>3</sub>) δ 7.51 – 7.37 (m, 1H), 7.25 – 7.09 (m, 2H), 7.05 – 6.98 (m, 1H), 6.96 – 6.86 (m, 2H), 6.68 – 6.53 (m, 2H), 5.60 (s, 2H), 5.12 (s, 2H), 4.92 (s, 2H), 3.59 (s, 3H), 2.25 (s, 3H). <sup>13</sup>C NMR (100 MHz, CDCl<sub>3</sub>) δ 155.2, 139.6, 136.3, 134.3, 128.0, 122.3, 121.1, 119.3, 118.8, 114.4, 109.6, 108.3, 88.0, 64.2, 62.4, 55.3, 8.8. HRMS (ESI) m/z calcd for C<sub>19</sub>H<sub>20</sub>N<sub>2</sub>O<sub>2</sub>Na<sup>+</sup> [M + Na]<sup>+</sup> = 331.1417, found = 331.1418.

11-Methyl-4-(*p*-tolyl)-4,5-dihydro-1*H*,3*H*-[1,3,5]oxadiazepino[5,6-*a*]indole **3h**:

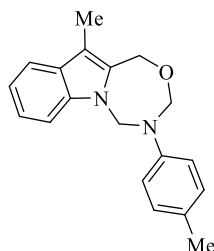

A white solid; 44.2 mg; isolated yield = 84%; m.p. 149.9 -150.6 °C; <sup>1</sup>H NMR (400 MHz, CDCl<sub>3</sub>) δ 7.47 – 7.38 (m, 1H), 7.29 – 7.22 (m, 1H), 7.21 – 7.13 (m, 1H), 7.07 – 6.98 (m, 1H), 6.94 – 6.84 (m, 4H), 5.66 (s, 2H), 5.18 (s, 2H), 4.91 (s, 2H), 2.22 (s, 3H), 2.11 (s, 3H). <sup>13</sup>C NMR (100 MHz, CDCl<sub>3</sub>) δ 143.3, 136.4, 134.2, 131.2, 129.8, 128.0, 122.4, 119.4, 118.8, 118.3, 109.6, 108.3, 87.0, 64.3, 61.5, 20.5, 8.8. HRMS (ESI) m/z calcd for C<sub>19</sub>H<sub>20</sub>N<sub>2</sub>ONa<sup>+</sup> [M + Na]<sup>+</sup> = 315.1468, found = 315.1470.

4-([1,1'-Biphenyl]-4-yl)-11-methyl-4,5-dihydro-1*H*,3*H*-[1,3,5]oxadiazepino[5,6-*a*]indole **3i**:

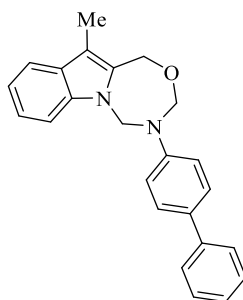

A white solid; 36.9 mg; isolated yield = 58%; m.p. 196.9 -197.7 °C;  $^1\text{H}$  NMR (400 MHz,  $\text{CDCl}_3$ )  $\delta$  7.50 – 7.40 (m, 3H), 7.38 – 7.30 (m, 4H), 7.27 – 7.18 (m, 3H), 7.12 – 7.02 (m, 3H), 5.81 (s, 2H), 5.30 (s, 2H), 4.98 (s, 2H), 2.25 (s, 3H).  $^{13}\text{C}$  NMR (100 MHz,  $\text{CDCl}_3$ )  $\delta$  144.9, 140.6, 136.3, 134.3, 134.0, 128.6, 128.0, 127.9, 126.6, 126.6, 122.5, 119.4, 118.9, 118.0, 109.9, 108.2, 86.6, 64.4, 61.2, 8.8. HRMS (ESI)  $m/z$  calcd for  $\text{C}_{24}\text{H}_{22}\text{N}_2\text{ONa}^+ [\text{M} + \text{Na}]^+ = 377.1624$ , found = 377.1631.

4-(4-Fluorophenyl)-11-methyl-4,5-dihydro-1H,3H-[1,3,5]oxadiazepino[5,6-a]indole  
**3j:**

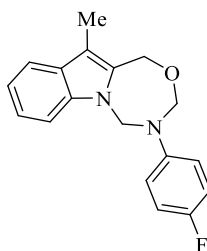

A white solid; 44.8 mg; isolated yield = 84%; m.p. 139.4 -140.2 °C;  $^1\text{H}$  NMR (400 MHz,  $\text{CDCl}_3$ )  $\delta$  7.53 – 7.37 (m, 1H), 7.28 – 7.10 (m, 2H), 7.07 – 7.01 (m, 1H), 7.00 – 6.94 (m, 2H), 6.80 – 6.72 (m, 2H), 5.66 (s, 2H), 5.15 (s, 2H), 4.94 (s, 2H), 2.25 (s, 3H).  $^{13}\text{C}$  NMR (100 MHz,  $\text{CDCl}_3$ )  $\delta$  159.6, 157.2 ( $J = 240$  Hz), 142.2, 142.2, 136.3, 134.1, 127.9, 122.5, 120.8, 120.8, 119.4, 118.9, 115.8, 115.6 ( $J = 22$  Hz), 109.9, 108.1, 87.6, 64.2, 62.2, 8.8.  $^{19}\text{F}$  NMR (376 MHz,  $\text{CDCl}_3$ )  $\delta$  -121.59. HRMS (ESI)  $m/z$  calcd for  $\text{C}_{18}\text{H}_{17}\text{FN}_2\text{ONa}^+ [\text{M} + \text{Na}]^+ = 319.1217$ , found = 319.1215.

4-(4-Chlorophenyl)-11-methyl-4,5-dihydro-1H,3H-[1,3,5]oxadiazepino[5,6-a]indole  
**3k:**

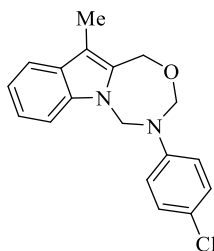

A white solid; 45.5mg; isolated yield = 81%; m.p. 175.8 -176.6 °C;  $^1\text{H}$  NMR (400 MHz,  $\text{CDCl}_3$ )  $\delta$  7.45 (m,  $J = 7.9$  Hz, 1H), 7.25 (m,  $J = 8.4$  Hz, 1H), 7.22 – 7.15 (m, 1H), 7.09 – 7.01 (m, 3H), 6.98 – 6.92 (m, 2H), 5.69 (s, 2H), 5.18 (s, 2H), 4.93 (s, 2H), 2.23 (s,

3H).  $^{13}\text{C}$  NMR (100 MHz,  $\text{CDCl}_3$ )  $\delta$  144.3, 136.4, 133.9, 129.1, 127.9, 126.9, 122.6, 119.5, 119.5, 119.0, 110.1, 108.1, 86.7, 64.3, 61.4, 8.8. HRMS (ESI)  $m/z$  calcd for  $\text{C}_{18}\text{H}_{17}\text{ClN}_2\text{ONa}^+$   $[\text{M} + \text{Na}]^+ = 335.0922$ , found = 335.0929.

**4-(4-Bromophenyl)-11-methyl-4,5-dihydro-1*H*,3*H*-[1,3,5]oxadiazepino[5,6-*a*]indole 3l:**

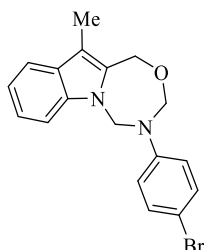

A white solid; 53.2 mg; isolated yield = 83%; m.p. 193.1 -193.6 °C;  $^1\text{H}$  NMR (400 MHz,  $\text{CDCl}_3$ )  $\delta$  7.50 – 7.40 (m, 1H), 7.27 – 7.23 (m, 1H), 7.22 – 7.15 (m, 3H), 7.10 – 7.01 (m, 1H), 6.96 – 6.84 (m, 2H), 5.72 (s, 2H), 5.20 (s, 2H), 4.95 (s, 2H), 2.24 (s, 3H).  $^{13}\text{C}$  NMR (100 MHz,  $\text{CDCl}_3$ )  $\delta$  144.7, 136.4, 133.8, 132.0, 127.9, 122.6, 119.8, 119.5, 119.0, 114.4, 110.1, 108.0, 86.6, 64.3, 61.3, 8.7. HRMS (ESI)  $m/z$  calcd for  $\text{C}_{18}\text{H}_{17}\text{BrN}_2\text{ONa}^+$   $[\text{M} + \text{Na}]^+ = 379.0416$ , found = 379.0426.

**4-Butyl-11-methyl-4,5-dihydro-1*H*,3*H*-[1,3,5]oxadiazepino[5,6-*a*]indole 3m:**

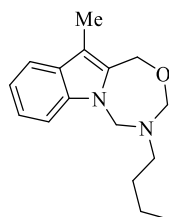

A white solid; 33.5 mg; isolated yield = 72%; m.p. 58.3 -58.9 °C;  $^1\text{H}$  NMR (400 MHz,  $\text{CDCl}_3$ )  $\delta$  7.58 – 7.45 (m, 1H), 7.30 – 7.16 (m, 2H), 7.11 – 7.02 (m, 1H), 5.22 (s, 2H), 4.82 (s, 2H), 4.71 (s, 2H), 2.36 – 2.31 (m, 2H), 2.30 (s, 3H), 1.48 – 1.34 (m, 2H), 1.28 – 1.13 (m, 2H), 0.88 – 0.74 (t, 3H).  $^{13}\text{C}$  NMR (100 MHz,  $\text{CDCl}_3$ )  $\delta$  137.0, 134.6, 127.9, 122.2, 119.4, 118.8, 109.4, 108.3, 89.7, 63.8, 62.2, 46.6, 29.5, 20.2, 13.9, 8.8. HRMS (ESI)  $m/z$  calcd for  $\text{C}_{16}\text{H}_{23}\text{N}_2\text{O}^+$   $[\text{M} + \text{H}]^+ = 259.1805$ , found = 259.1808.

**2-(11-Methyl-1*H*,3*H*-[1,3,5]oxadiazepino[5,6-*a*]indol-4(5*H*)-yl)ethan-1-ol 3n:**

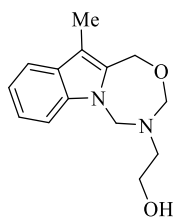

A white solid; 39.9 mg; isolated yield = 90%; m.p. 112.3 -113.0 °C;  $^1\text{H}$  NMR (400 MHz,  $\text{CDCl}_3$ )  $\delta$  7.55 – 7.47 (m, 1H), 7.26 – 7.16 (m, 2H), 7.11 – 7.03 (m, 1H), 5.22 (s, 2H), 4.83 (s, 2H), 4.72 (s, 2H), 3.45 – 3.32 (t, 2H), 2.64 – 2.53 (t, 2H), 2.46 (s, 1H), 2.29 (s,

3H).  $^{13}\text{C}$  NMR (100 MHz,  $\text{CDCl}_3$ )  $\delta$  136.9, 134.2, 127.9, 122.6, 119.6, 119.1, 110.1, 108.2, 89.8, 63.7, 62.3, 58.9, 50.1, 8.8. HRMS (ESI)  $m/z$  calcd for  $\text{C}_{14}\text{H}_{18}\text{N}_2\text{O}_2\text{Na}^+$  [ $\text{M} + \text{Na}$ ] $^+ = 269.1260$ , found = 269.1259.

**4-Cyclohexyl-11-methyl-4,5-dihydro-1*H*,3*H*-[1,3,5]oxadiazepino[5,6-*a*]indole 3o:**

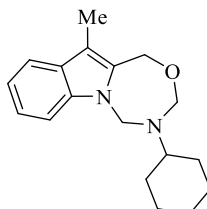

A white solid; 41.4 mg; isolated yield = 81%; m.p. 106.7 -107.4 °C;  $^1\text{H}$  NMR (400 MHz,  $\text{CDCl}_3$ )  $\delta$  7.54 – 7.48 (m, 1H), 7.32 – 7.22 (m, 1H), 7.22 – 7.15 (m, 1H), 7.11 – 7.01 (m, 1H), 5.28 (s, 2H), 4.83 (s, 2H), 4.81 (s, 2H), 2.42 – 2.31 (m, 1H), 2.29 (s, 3H), 1.86 – 1.71 (m, 2H), 1.65 – 1.54 (m, 2H), 1.49 – 1.35 (m, 1H), 1.20 – 0.92 (m, 5H).  $^{13}\text{C}$  NMR (100 MHz,  $\text{CDCl}_3$ )  $\delta$  136.4, 134.9, 128.0, 122.1, 119.3, 118.7, 109.1, 108.4, 87.6, 64.1, 60.9, 55.4, 31.4, 25.8, 25.1, 8.8. HRMS (ESI)  $m/z$  calcd for  $\text{C}_{18}\text{H}_{25}\text{N}_2\text{O}^+$  [ $\text{M} + \text{H}$ ] $^+ = 285.1961$  found = 285.1957.

**4-Cyclopropyl-11-methyl-4,5-dihydro-1*H*,3*H*-[1,3,5]oxadiazepino[5,6-*a*]indole 3p:**

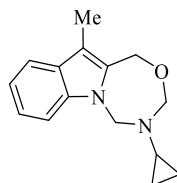

A white solid; 34.9 mg; isolated yield = 80%; m.p. 77.8 -78.3 °C;  $^1\text{H}$  NMR (400 MHz,  $\text{CDCl}_3$ )  $\delta$  7.58 – 7.46 (m, 1H), 7.35 – 7.27 (m, 1H), 7.25 – 7.16 (m, 1H), 7.11 – 7.03 (m, 1H), 5.20 (s, 2H), 4.86 (s, 2H), 4.71 (s, 2H), 2.32 (s, 3H), 1.79 – 1.64 (m, 1H), 0.49 – 0.43 (m, 2H), 0.42 – 0.37 (m, 2H).  $^{13}\text{C}$  NMR (100 MHz,  $\text{CDCl}_3$ )  $\delta$  137.1, 134.6, 127.8, 122.2, 119.4, 118.8, 109.6, 108.5, 89.5, 63.7, 62.6, 28.6, 8.8, 7.1. HRMS (ESI)  $m/z$  calcd for  $\text{C}_{15}\text{H}_{18}\text{N}_2\text{ONa}^+$  [ $\text{M} + \text{Na}$ ] $^+ = 265.1311$ , found = 265.1316.

**4-(*Tert*-butyl)-11-methyl-4,5-dihydro-1*H*,3*H*-[1,3,5]oxadiazepino[5,6-*a*]indole 3q:**

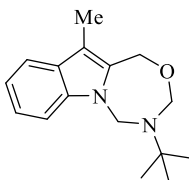

A white solid; 36.7 mg; isolated yield = 79%; m.p. 93.1 -93.8 °C;  $^1\text{H}$  NMR (400 MHz,  $\text{CDCl}_3$ )  $\delta$  7.57 – 7.45 (m, 1H), 7.33 – 7.25 (m, 1H), 7.25 – 7.15 (m, 1H), 7.11 – 7.00 (m, 1H), 5.38 (s, 2H), 4.92 (s, 2H), 4.87 (s, 2H), 2.29 (s, 3H), 0.99 (s, 9H).  $^{13}\text{C}$  NMR (100 MHz,  $\text{CDCl}_3$ )  $\delta$  135.5, 134.9, 128.3, 122.0, 119.3, 118.6, 109.1, 108.8, 87.0, 63.9, 60.0, 53.8, 29.5, 8.8. HRMS (ESI)  $m/z$  calcd for  $\text{C}_{16}\text{H}_{23}\text{N}_2\text{O}^+$  [ $\text{M} + \text{H}$ ] $^+ = 259.1805$ , found = 259.1813.

11-Ethyl-4-phenyl-4,5-dihydro-1*H*,3*H*-[1,3,5]oxadiazepino[5,6-*a*]indole 3r:

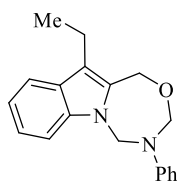

A white solid; 42.1 mg; isolated yield = 80%; m.p. 155.3 -155.8 °C; <sup>1</sup>H NMR (400 MHz, CDCl<sub>3</sub>) δ 7.52 – 7.43 (m, 1H), 7.32 – 7.25 (m, 1H), 7.20 – 7.14 (m, 1H), 7.12 – 7.06 (m, 2H), 7.05 – 6.98 (m, 3H), 6.83 – 6.75 (m, 1H), 5.72 (s, 2H), 5.22 (s, 2H), 4.94 (s, 2H), 2.70 (q, *J* = 7.6 Hz, 2H), 1.18 (t, *J* = 7.6 Hz, 3H). <sup>13</sup>C NMR (100 MHz, CDCl<sub>3</sub>) δ 145.8, 136.4, 133.7, 129.2, 127.0, 122.3, 121.8, 119.4, 118.9, 118.2, 116.7, 108.4, 86.8, 64.1, 61.4, 17.6, 16.3. HRMS (ESI) *m/z* calcd for C<sub>19</sub>H<sub>20</sub>N<sub>2</sub>O<sup>+</sup> [M + Na]<sup>+</sup> = 315.1468, found = 315.1470.

4,11-Diphenyl-4,5-dihydro-1*H*,3*H*-[1,3,5]oxadiazepino[5,6-*a*]indole 3s:

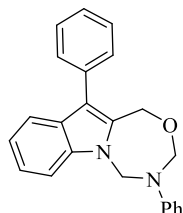

A white solid; 46.5 mg; isolated yield = 76%; m.p. 168.3 -168.9 °C; <sup>1</sup>H NMR (400 MHz, CDCl<sub>3</sub>) δ 7.61 – 7.56 (m, 1H), 7.47 – 7.35 (m, 5H), 7.34 – 7.29 (m, 1H), 7.27 – 7.20 (m, 1H), 7.17 – 7.03 (m, 5H), 6.89 – 6.80 (m, 1H), 5.86 (s, 2H), 5.27 (s, 2H), 5.04 (s, 2H). <sup>13</sup>C NMR (100 MHz, CDCl<sub>3</sub>) δ 145.8, 136.3, 134.7, 134.3, 130.0, 129.2, 128.6, 126.6, 126.5, 122.8, 121.9, 120.0, 119.9, 118.3, 117.1, 108.6, 86.8, 64.9, 61.6. HRMS (ESI) *m/z* calcd for C<sub>23</sub>H<sub>20</sub>N<sub>2</sub>O<sup>+</sup> [M + Na]<sup>+</sup> = 363.1468, found = 363.1463.

11-(3-Chlorophenyl)-4-phenyl-4,5-dihydro-1*H*,3*H*-[1,3,5]oxadiazepino[5,6-*a*]indole 3t:

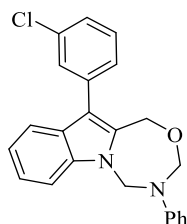

A white solid; 41.8 mg; isolated yield = 62%; m.p. 114.3 -114.9 °C; <sup>1</sup>H NMR (400 MHz, CDCl<sub>3</sub>) δ 7.60 – 7.50 (m, 1H), 7.43 – 7.31 (m, 3H), 7.31 – 7.21 (m, 3H), 7.19 – 7.10 (m, 2H), 7.10 – 7.04 (m, 3H), 6.88 – 6.80 (m, 1H), 5.83 (s, 2H), 5.25 (s, 2H), 5.00 (s, 2H). <sup>13</sup>C NMR (100 MHz, CDCl<sub>3</sub>) δ 145.7, 136.3, 136.3, 135.1, 134.4, 129.8, 129.3, 128.2, 126.6, 126.4, 123.1, 122.0, 120.2, 119.8, 118.2, 115.8, 108.8, 86.8, 64.6, 61.6. HRMS (ESI) *m/z* calcd for C<sub>23</sub>H<sub>19</sub>ClN<sub>2</sub>O<sup>+</sup> [M + Na]<sup>+</sup> = 397.1078, found = 397.1078.



11-(4-Methoxyphenyl)-4-phenyl-4,5-dihydro-1*H*,3*H*-[1,3,5]oxadiazepino[5,6-*a*]indole **3u**:

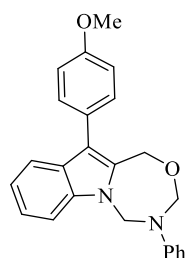

A white solid; 46.0 mg; isolated yield = 69%; m.p. 132.3 -133.1 °C; <sup>1</sup>H NMR (400 MHz, CDCl<sub>3</sub>) δ 7.61 – 7.49 (m, 1H), 7.41 – 7.26 (m, 3H), 7.24 – 7.19 (m, 1H), 7.17 – 7.01 (m, 5H), 6.99 – 6.93 (m, 2H), 6.90 – 6.75 (m, 1H), 5.82 (s, 2H), 5.25 (s, 2H), 5.00 (s, 2H), 3.84 (s, 3H). <sup>13</sup>C NMR (100 MHz, CDCl<sub>3</sub>) δ 158.4, 145.8, 136.3, 134.4, 131.1, 129.2, 126.9, 126.6, 122.7, 121.9, 120.0, 119.8, 118.2, 116.8, 114.1, 108.6, 86.8, 64.9, 61.5, 55.4. HRMS (ESI) m/z calcd for C<sub>24</sub>H<sub>22</sub>N<sub>2</sub>O<sub>2</sub>Na<sup>+</sup> [M + Na]<sup>+</sup> = 393.1573, found = 393.1567.

4-Phenyl-11-(*p*-tolyl)-4,5-dihydro-1*H*,3*H*-[1,3,5]oxadiazepino[5,6-*a*]indole **3v**:

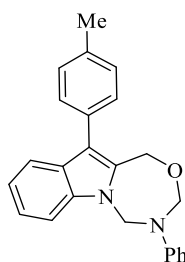

A white solid; 43.4 mg; isolated yield = 68%; m.p. 171.1 -171.8 °C; <sup>1</sup>H NMR (400 MHz, CDCl<sub>3</sub>) δ 7.66 – 7.53 (m, 1H), 7.43 – 7.33 (m, 1H), 7.32 – 7.27 (m, 2H), 7.27 – 7.19 (m, 3H), 7.18 – 7.00 (m, 5H), 6.90 – 6.79 (m, 1H), 5.84 (s, 2H), 5.26 (s, 2H), 5.02 (s, 2H), 2.40 (s, 3H). <sup>13</sup>C NMR (100 MHz, CDCl<sub>3</sub>) δ 145.8, 136.3, 136.1, 134.6, 131.3, 129.9, 129.3, 129.2, 126.7, 122.7, 121.9, 120.1, 119.8, 118.2, 117.0, 108.6, 86.8, 64.9, 61.6, 21.2. HRMS (ESI) m/z calcd for C<sub>24</sub>H<sub>22</sub>N<sub>2</sub>O<sub>2</sub>Na<sup>+</sup> [M + Na]<sup>+</sup> = 377.1624, found = 377.1620.

11-(4-Fluorophenyl)-4-phenyl-4,5-dihydro-1*H*,3*H*-[1,3,5]oxadiazepino[5,6-*a*]indole **3w**:

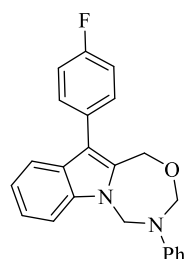

A white solid; 38.7 mg; isolated yield = 60%; m.p. 165.1 -165.7 °C; <sup>1</sup>H NMR (400 MHz, CDCl<sub>3</sub>) δ 7.56 – 7.48 (m, 1H), 7.41 – 7.32 (m, 3H), 7.26 – 7.20 (m, 1H), 7.17 – 7.02

(m, 7H), 6.92 – 6.79 (m, 1H), 5.86 (s, 2H), 5.27 (s, 2H), 5.00 (s, 2H).  $^{13}\text{C}$  NMR (100 MHz,  $\text{CDCl}_3$ )  $\delta$  163.0, 160.6 ( $J = 244$  Hz), 145.7, 136.3, 134.7, 131.5, 131.4, 130.2, 130.2, 129.3, 126.6, 122.9, 122.0, 120.0, 119.8, 118.2, 116.1, 115.6, 115.4 ( $J = 22$  Hz), 108.7, 86.8, 64.7, 61.6.  $^{19}\text{F}$  NMR (376 MHz,  $\text{CDCl}_3$ )  $\delta$  -116.15. HRMS (ESI)  $m/z$  calcd for  $\text{C}_{23}\text{H}_{19}\text{FN}_2\text{ONa}^+ [\text{M} + \text{Na}]^+ = 381.1374$ , found = 381.1373.

11-(4-Chlorophenyl)-4-phenyl-4,5-dihydro-1*H*,3*H*-[1,3,5]oxadiazepino[5,6-*a*]indole

**3x:**

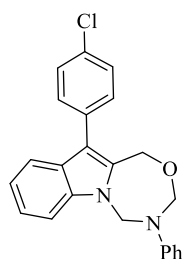

A white solid; 42.4 mg; isolated yield = 63%; m.p. 154.4 -155.0 °C;  $^1\text{H}$  NMR (400 MHz,  $\text{CDCl}_3$ )  $\delta$  7.55 – 7.50 (m, 1H), 7.44 – 7.35 (m, 3H), 7.34 – 7.29 (m, 2H), 7.27 – 7.21 (m, 1H), 7.17 – 7.11 (m, 2H), 7.11 – 7.03 (m, 3H), 6.89 – 6.77 (m, 1H), 5.85 (s, 2H), 5.27 (s, 2H), 4.99 (s, 2H).  $^{13}\text{C}$  NMR (100 MHz,  $\text{CDCl}_3$ )  $\delta$  145.7, 136.3, 134.9, 132.8, 132.4, 131.2, 130.0, 129.3, 128.8, 128.6, 126.4, 123.0, 122.0, 120.1, 119.7, 118.3, 118.2, 115.9, 108.7, 86.8, 64.7, 61.6. HRMS (ESI)  $m/z$  calcd for  $\text{C}_{23}\text{H}_{19}\text{ClN}_2\text{ONa}^+ [\text{M} + \text{Na}]^+ = 397.1078$ , found = 397.1082.

10-Fluoro-11-methyl-4-phenyl-4,5-dihydro-1*H*,3*H*-[1,3,5]oxadiazepino[5,6-*a*]indole

**3y:**

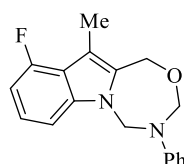

A white solid; 38.9 mg; isolated yield = 73%; m.p. 125.4 -126.3 °C;  $^1\text{H}$  NMR (400 MHz,  $\text{CDCl}_3$ )  $\delta$  7.16 – 7.08 (m, 2H), 7.06 – 6.99 (m, 4H), 6.87 – 6.78 (m, 1H), 6.68 – 6.57 (m, 1H), 5.71 (s, 2H), 5.23 (s, 2H), 4.91 (s, 2H), 2.36 (s, 3H).  $^{13}\text{C}$  NMR (100 MHz,  $\text{CDCl}_3$ )  $\delta$  158.9, 156.5 ( $J = 246$  Hz), 145.5, 139.0, 138.9, 134.1, 129.2, 122.8, 122.7, 121.9, 118.1, 116.6, 116.4 ( $J = 19$  Hz), 108.5, 108.5, 104.4, 104.4, 104.3, 104.1, 63.8, 61.7, 10.5, 10.4.  $^{19}\text{F}$  NMR (376 MHz,  $\text{CDCl}_3$ )  $\delta$  -124.67. HRMS (ESI)  $m/z$  calcd for  $\text{C}_{18}\text{H}_{17}\text{FN}_2\text{ONa}^+ [\text{M} + \text{Na}]^+ = 319.1217$ , found = 319.1227.

9-Methoxy-11-methyl-4-phenyl-4,5-dihydro-1*H*,3*H*-[1,3,5]oxadiazepino[5,6-*a*]indole

**3z:**

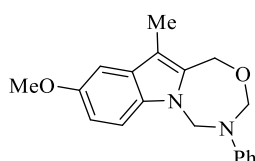

A white solid; 45.5 mg; isolated yield = 82%; m.p. 135.0 -135.7 °C; <sup>1</sup>H NMR (400 MHz, CDCl<sub>3</sub>) δ 7.21 – 7.15 (m, 1H), 7.14 – 7.07 (m, 2H), 7.04 – 6.98 (m, 2H), 6.89 – 6.77 (m, 3H), 5.69 (s, 2H), 5.23 (s, 2H), 4.93 (s, 2H), 3.82 (s, 3H), 2.20 (s, 3H). <sup>13</sup>C NMR (100 MHz, CDCl<sub>3</sub>) δ 153.6, 145.7, 134.8, 131.6, 129.2, 128.2, 121.7, 118.0, 112.4, 109.2, 109.0, 101.2, 86.7, 64.4, 61.5, 55.9, 8.8. HRMS (ESI) m/z calcd for C<sub>19</sub>H<sub>20</sub>N<sub>2</sub>O<sub>2</sub>Na<sup>+</sup> [M + Na]<sup>+</sup> = 331.1417, found = 331.1412.

**9,11-Dimethyl-4-phenyl-4,5-dihydro-1*H*,3*H*-[1,3,5]oxadiazepino[5,6-*a*]indole 3*a*'**

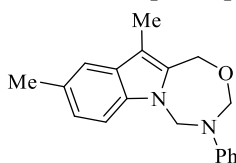

A white solid; 37.3 mg; isolated yield = 71%; m.p. 145.5 -146.4 °C; <sup>1</sup>H NMR (400 MHz, CDCl<sub>3</sub>) δ 7.24 – 7.20 (m, 1H), 7.19 – 7.15 (m, 1H), 7.12 – 7.06 (m, 2H), 7.04 – 6.97 (m, 3H), 6.83 – 6.75 (m, 1H), 5.69 (s, 2H), 5.22 (s, 2H), 4.92 (s, 2H), 2.41 (s, 3H), 2.20 (s, 3H). <sup>13</sup>C NMR (100 MHz, CDCl<sub>3</sub>) δ 145.8, 134.8, 134.2, 129.2, 128.2, 128.0, 123.9, 121.6, 119.1, 118.0, 109.2, 108.0, 86.7, 64.4, 61.3, 21.4, 8.8. HRMS (ESI) m/z calcd for C<sub>19</sub>H<sub>20</sub>N<sub>2</sub>ONa<sup>+</sup> [M + Na]<sup>+</sup> = 315.1468, found = 315.1467.

**9-Chloro-11-methyl-4-phenyl-4,5-dihydro-1*H*,3*H*-[1,3,5]oxadiazepino[5,6-*a*]indole 3*b*'**

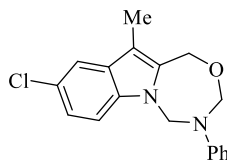

A white solid; 44.9 mg; isolated yield = 80%; m.p. 171.3 -172.1 °C; <sup>1</sup>H NMR (400 MHz, CDCl<sub>3</sub>) δ 7.42 – 7.34 (m, 1H), 7.21 – 7.05 (m, 4H), 7.03 – 6.95 (m, 2H), 6.87 – 6.75 (m, 1H), 5.68 (s, 2H), 5.21 (s, 2H), 4.91 (s, 2H), 2.17 (s, 3H). <sup>13</sup>C NMR (100 MHz, CDCl<sub>3</sub>) δ 145.5, 135.5, 134.8, 129.2, 129.1, 124.5, 122.6, 121.9, 118.9, 118.1, 109.4, 109.3, 86.7, 64.1, 61.6, 8.7. HRMS (ESI) m/z calcd for C<sub>18</sub>H<sub>17</sub>ClN<sub>2</sub>ONa<sup>+</sup> [M + Na]<sup>+</sup> = 335.0922, found = 335.0928.

**8-Chloro-11-methyl-4-phenyl-4,5-dihydro-1*H*,3*H*-[1,3,5]oxadiazepino[5,6-*a*]indole 3*c*'**

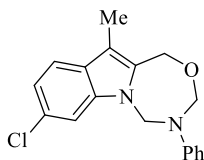

A white solid; 39.3 mg; isolated yield = 70%; m.p. 178.4 -179.2 °C; <sup>1</sup>H NMR (400 MHz, CDCl<sub>3</sub>) δ 7.35 – 7.28 (m, 1H), 7.26 – 7.23 (m, 1H), 7.16 – 7.09 (m, 2H), 7.04 – 6.95 (m, 3H), 6.87 – 6.78 (m, 1H), 5.65 (s, 2H), 5.21 (s, 2H), 4.90 (s, 2H), 2.19 (s, 3H). <sup>13</sup>C NMR (100 MHz, CDCl<sub>3</sub>) δ 145.5, 136.7, 134.9, 129.3, 128.3, 126.6, 121.9, 120.2, 119.6, 118.1, 109.9, 108.3, 86.7, 64.1, 61.5, 8.7. HRMS (ESI) m/z calcd for C<sub>18</sub>H<sub>17</sub>ClN<sub>2</sub>ONa<sup>+</sup> [M + Na]<sup>+</sup> = 335.0922, found = 335.0931.

7-Fluoro-11-methyl-4-phenyl-4,5-dihydro-1*H*,3*H*-[1,3,5]oxadiazepino[5,6-*a*]indole 3 d':

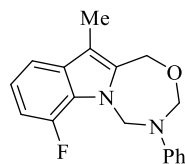

A white solid; 39.9 mg; isolated yield = 75%; m.p. 155.2 -156.0 °C; <sup>1</sup>H NMR (400 MHz, CDCl<sub>3</sub>) δ 7.20 – 7.08 (m, 5H), 6.96 – 6.73 (m, 3H), 6.14 – 5.94 (m, 2H), 5.22 (s, 2H), 4.92 (s, 2H), 2.21 (s, 3H). <sup>13</sup>C NMR (100 MHz, CDCl<sub>3</sub>) δ 150.4, 148.0 (*J* = 240 Hz), 145.3, 135.6, 131.9, 131.8, 129.2, 124.3, 124.2, 121.5, 119.0, 118.9, 117.6, 117.6, 115.2, 115.1, 111.0, 108.4, 108.2 (*J* = 19 Hz), 86.5, 63.8, 63.3, 63.2, 9.0. <sup>19</sup>F NMR (376 MHz, CDCl<sub>3</sub>) δ -134.97. HRMS (ESI) *m/z* calcd for C<sub>18</sub>H<sub>17</sub>FN<sub>2</sub>ONa<sup>+</sup> [*M* + Na]<sup>+</sup> = 319.1217, found = 319.1210.

7-Bromo-11-methyl-4-phenyl-4,5-dihydro-1*H*,3*H*-[1,3,5]oxadiazepino[5,6-*a*]indole 3 e':

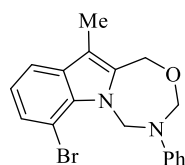

A white solid; 49.9 mg; isolated yield = 78%; m.p. 149.7 -150.3 °C; <sup>1</sup>H NMR (400 MHz, CDCl<sub>3</sub>) δ 7.49 – 7.40 (m, 1H), 7.34 – 7.25 (m, 1H), 7.23 – 7.16 (m, 1H), 7.14 – 7.07 (m, 2H), 7.06 – 7.00 (m, 2H), 6.84 – 6.75 (m, 1H), 5.74 (s, 2H), 5.24 (s, 2H), 4.95 (s, 2H), 2.23 (s, 3H). <sup>13</sup>C NMR (100 MHz, CDCl<sub>3</sub>) δ 145.7, 136.3, 134.1, 129.2, 128.0, 122.4, 121.7, 119.3, 118.9, 118.0, 109.7, 108.3, 86.7, 64.3, 61.3, 8.8. HRMS (ESI) *m/z* calcd for C<sub>18</sub>H<sub>17</sub>BrN<sub>2</sub>ONa<sup>+</sup> [*M* + Na]<sup>+</sup> = 379.0416, found = 379.0415.

4-Chloro-*N*-((4-(4-chlorophenyl)-4,5-dihydro-1*H*,3*H*-[1,3,5]oxadiazepino[5,6-*a*]indol-11-yl)methyl)aniline 3k'

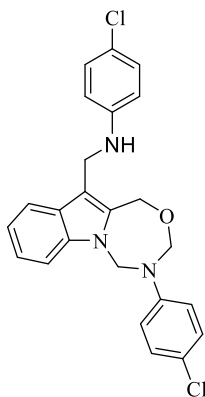

A white solid; 24.4 mg; isolated yield = 28%; m.p. 212.3. -213.1 °C; <sup>1</sup>H NMR (400 MHz, CDCl<sub>3</sub>) δ 7.59 – 7.50 (m, 1H), 7.36 – 7.28 (m, 1H), 7.26 – 7.21 (m, 1H), 7.19 – 7.06 (m, 5H), 7.01 – 6.96 (m, 2H), 6.62 – 6.53 (m, 2H), 5.78 (s, 2H), 5.22 (s, 2H), 5.01

(s, 2H), 4.32 (s, 2H), 3.67 (s, 1H).  $^{13}\text{C}$  NMR (101 MHz,  $\text{CDCl}_3$ )  $\delta$  146.8, 144.1, 136.5, 135.8, 129.2, 129.1, 129.1, 127.2, 126.6, 123.1, 122.1, 119.9, 119.6, 119.5, 116.2, 113.8, 111.1, 108.5, 86.9, 64.0, 61.6, 38.8. HRMS (ESI)  $m/z$  calcd for  $\text{C}_{24}\text{H}_{21}\text{Cl}_2\text{N}_3\text{Na}^+ [\text{M} + \text{Na}]^+ = 460.0954$ , found = 460.0959.

2,5,5-Triphenyl-2,3,5,6-tetrahydro-1H-[1,3]oxazepino[6,5-b]indole 4b:

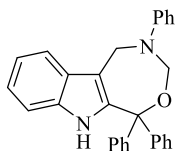

A white solid; 59.2 mg; isolated yield = 79%; m.p. 186.9 - 187.6 °C;  $^1\text{H}$  NMR (400 MHz, DMSO)  $\delta$  9.65 (s, 1H), 7.80 – 7.73 (m, 1H), 7.41 – 7.29 (m, 7H), 7.21 – 7.11 (m, 4H), 7.09 – 7.03 (m, 2H), 7.02 – 6.96 (m, 4H), 6.77 – 6.69 (m, 1H), 5.23 (s, 2H), 4.73 (s, 2H).  $^{13}\text{C}$  NMR (100 MHz, DMSO)  $\delta$  148.0, 144.1, 139.1, 135.4, 129.3, 128.7, 128.6, 128.4, 128.2, 128.1, 127.4, 121.6, 119.6, 119.0, 118.4, 115.9, 113.0, 112.5, 86.3, 79.0, 45.9. HRMS (ESI)  $m/z$  calcd for  $\text{C}_{29}\text{H}_{24}\text{N}_2\text{O}^+ [\text{M} + \text{K}]^+ = 455.1520$ , found = 455.1526.

2-Phenyl-5,5-di-*p*-tolyl-2,3,5,6-tetrahydro-1H-[1,3]oxazepino[6,5-b]indole 4c:

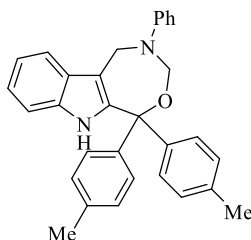

A colorless oil; 52.8 mg; isolated yield = 66%;  $^1\text{H}$  NMR (400 MHz,  $\text{CDCl}_3$ )  $\delta$  7.62 – 7.53 (m, 1H), 7.15 – 6.97 (m, 12H), 6.94 – 6.86 (m, 4H), 6.73 – 6.64 (m, 1H), 5.20 (s, 2H), 4.65 (s, 2H), 2.26 (s, 6H).  $^{13}\text{C}$  NMR (100 MHz,  $\text{CDCl}_3$ )  $\delta$  147.8, 140.8, 138.9, 137.9, 134.3, 129.1, 128.5, 127.6, 127.4, 121.9, 119.9, 119.1, 118.2, 116.1, 113.9, 111.2, 85.9, 79.4, 46.1, 21.2. HRMS (ESI)  $m/z$  calcd for  $\text{C}_{31}\text{H}_{29}\text{N}_2\text{O}^+ [\text{M} + \text{H}]^+ = 445.2274$ , found = 445.2270.

5,5-Bis(4-chlorophenyl)-2-phenyl-2,3,5,6-tetrahydro-1H-[1,3]oxazepino[6,5-b]indole 4d:

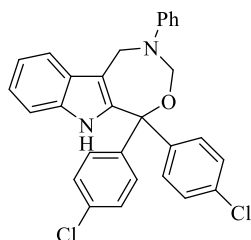

A colorless oil; 65.4 mg; isolated yield = 75%;  $^1\text{H}$  NMR (400 MHz,  $\text{CDCl}_3$ )  $\delta$  7.63 – 7.55 (m, 1H), 7.22 – 7.15 (m, 5H), 7.13 – 7.07 (m, 5H), 7.01 – 6.92 (m, 6H), 6.74 – 6.67 (m, 1H), 5.19 (s, 2H), 4.65 (s, 2H).  $^{13}\text{C}$  NMR (100 MHz,  $\text{CDCl}_3$ )  $\delta$  147.3, 141.9, 137.0, 134.6, 134.4, 129.8, 129.3, 129.1, 128.9, 128.7, 128.6, 127.3, 122.5, 120.3, 119.3,

118.3, 115.7, 114.5, 111.3, 84.9, 79.5, 45.9. HRMS (ESI)  $m/z$  calcd for  $C_{29}H_{23}Cl_2N_2O^+$   $[M + H]^+ = 485.1182$ , found = 485.1184.

2-(4-Methoxyphenyl)-5,5-diphenyl-2,3,5,6-tetrahydro-1H-[1,3]oxazepino[6,5-b]indole 4e:

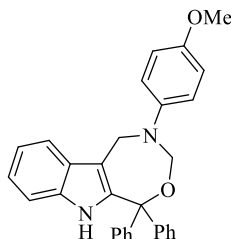

A white solid; 66.7 mg; isolated yield = 83%; m.p. 173.6 -174.0°C;  $^1H$  NMR (400 MHz, DMSO)  $\delta$  9.60 (s, 1H), 7.79 – 7.65 (m, 1H), 7.39 – 7.29 (m, 7H), 7.15 – 7.09 (m, 2H), 7.07 – 7.02 (m, 2H), 7.01 – 6.95 (m, 4H), 6.86 – 6.73 (m, 2H), 5.17 (s, 2H), 4.65 (s, 2H), 3.65 (s, 3H).  $^{13}C$  NMR (100 MHz, DMSO)  $\delta$  152.9, 144.2, 142.0, 139.3, 135.4, 128.7, 128.6, 128.4, 127.4, 121.6, 119.5, 118.4, 117.7, 114.7, 113.1, 112.4, 86.3, 79.8, 55.6, 46.7. HRMS (ESI)  $m/z$  calcd for  $C_{30}H_{27}N_2O_2^+$   $[M + H]^+ = 447.2067$ , found = 447.2061.

5,5-Diphenyl-2-(*p*-tolyl)-2,3,5,6-tetrahydro-1H-[1,3]oxazepino[6,5-b]indole 4f:

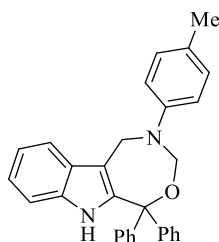

A white solid; 57.3 mg; isolated yield = 74%; m.p. 218.2 -218.8 °C;  $^1H$  NMR (400 MHz,  $CDCl_3$ )  $\delta$  7.69 – 7.60 (m, 1H), 7.35 – 7.26 (m, 6H), 7.19 – 7.05 (m, 10H), 7.03 – 6.95 (m, 2H), 5.27 (s, 2H), 4.71 (s, 2H), 2.22 (s, 3H).  $^{13}C$  NMR (100 MHz,  $CDCl_3$ )  $\delta$  145.4, 143.8, 138.4, 134.4, 129.7, 129.6, 128.6, 128.5, 128.5, 128.4, 128.3, 128.2, 127.8, 127.6, 127.5, 122.0, 119.9, 118.2, 116.3, 114.3, 111.2, 86.1, 79.9, 46.4, 20.4. HRMS (ESI)  $m/z$  calcd for  $C_{30}H_{27}N_2O^+$   $[M + H]^+ = 431.2118$ , found = 431.2131.

2-Benzyl-5,5-diphenyl-2,3,5,6-tetrahydro-1H-[1,3]oxazepino[6,5-b]indole 4g:

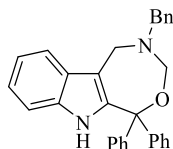

A white solid; 52.7 mg; isolated yield = 68%; m.p. 195.7 -196.3 °C;  $^1H$  NMR (400 MHz,  $CDCl_3$ )  $\delta$  7.32 – 6.96 (m, 20H), 4.72 (s, 2H), 4.01 (s, 2H), 3.97 (s, 2H).  $^{13}C$  NMR (100 MHz,  $CDCl_3$ )  $\delta$  143.8, 139.2, 138.9, 134.6, 129.5, 128.7, 128.5, 128.5, 128.3, 128.2, 127.6, 127.1, 121.9, 119.7, 118.6, 112.8, 111.1, 86.2, 83.8, 53.9, 47.3. HRMS (ESI)  $m/z$  calcd for  $C_{30}H_{27}N_2O^+$   $[M + H]^+ = 431.2118$ , found = 431.2115.

2-Cyclopropyl-5,5-diphenyl-2,3,5,6-tetrahydro-1H-[1,3]oxazepino[6,5-b]indole 4h:

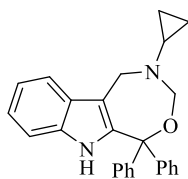

A white solid; 38.3 mg; isolated yield = 56%; m.p. 221.0 -221.7 °C; <sup>1</sup>H NMR (400 MHz, CDCl<sub>3</sub>) δ 7.64 – 7.54 (m, 1H), 7.39 – 7.28 (m, 6H), 7.22 – 7.09 (m, 8H), 4.74 (s, 2H), 4.18 (s, 2H), 2.78 – 2.59 (m, 1H), 0.65 – 0.42 (m, 4H). <sup>13</sup>C NMR (100 MHz, CDCl<sub>3</sub>) δ 143.9, 138.5, 134.6, 128.5, 128.4, 128.4, 128.2, 121.9, 119.7, 118.6, 113.7, 111.1, 86.2, 83.3, 48.9, 30.8, 7.3. HRMS (ESI) m/z calcd for C<sub>26</sub>H<sub>25</sub>N<sub>2</sub>O<sup>+</sup> [M + H]<sup>+</sup> = 381.1961, found = 381.1974.

9-Chloro-2-cyclopropyl-5,5-diphenyl-2,3,5,6-tetrahydro-1H-[1,3]oxazepino[6,5-b]indole 4i:

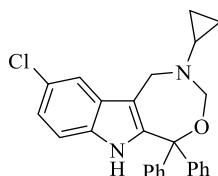

A white solid; 27.6 mg; isolated yield = 37%; m.p. 194.3 -195.1 °C; <sup>1</sup>H NMR (400 MHz, CDCl<sub>3</sub>) δ 7.46 – 7.37 (m, 1H), 7.31 – 7.23 (m, 6H), 7.18 – 7.07 (m, 5H), 7.05 – 6.97 (m, 2H), 4.65 (s, 2H), 4.05 (s, 2H), 2.88 – 2.34 (m, 1H), 0.60 – 0.23 (m, 4H). <sup>13</sup>C NMR (100 MHz, CDCl<sub>3</sub>) δ 143.6, 139.2, 134.8, 128.5, 128.4, 128.3, 127.8, 126.9, 120.4, 119.5, 113.8, 111.0, 86.0, 83.2, 48.8, 30.7, 7.3. HRMS (ESI) m/z calcd for C<sub>26</sub>H<sub>24</sub>ClN<sub>2</sub>O<sup>+</sup> [M + H]<sup>+</sup> = 415.1572, found = 415.1576.

8-Chloro-2-cyclopropyl-5,5-diphenyl-2,3,5,6-tetrahydro-1H-[1,3]oxazepino[6,5-b]indole 4j:

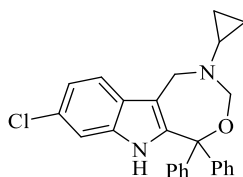

A white solid; 39.5 mg; isolated yield = 53%; m.p. 211.3 -211.9 °C; <sup>1</sup>H NMR (400 MHz, CDCl<sub>3</sub>) δ 7.45 – 7.37 (m, 1H), 7.30 – 7.21 (m, 6H), 7.19 – 7.06 (m, 5H), 7.05 – 6.97 (m, 2H), 4.65 (s, 2H), 4.05 (s, 2H), 2.70 – 2.44 (m, 1H), 0.55 – 0.32 (m, 4H). <sup>13</sup>C NMR (100 MHz, CDCl<sub>3</sub>) δ 143.6, 139.2, 134.8, 128.5, 128.4, 128.3, 127.8, 126.9, 120.4, 119.5, 113.8, 111.0, 86.0, 83.2, 48.8, 30.7, 7.3. HRMS (ESI) m/z calcd for C<sub>26</sub>H<sub>24</sub>ClN<sub>2</sub>O<sup>+</sup> [M + H]<sup>+</sup> = 415.1572, found = 415.1570.

8-Bromo-2-cyclopropyl-5,5-diphenyl-2,3,5,6-tetrahydro-1H-[1,3]oxazepino[6,5-b]indole 4k:

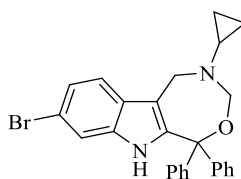

A white solid; 33.8 mg; isolated yield = 41%; m.p. 196.1 -196.9 °C;  $^1\text{H}$  NMR (400 MHz,  $\text{CDCl}_3$ )  $\delta$  7.40 – 7.33 (m, 1H), 7.28 – 7.21 (m, 7H), 7.18 – 7.04 (m, 6H), 4.65 (s, 2H), 4.05 (s, 2H), 2.69 – 2.43 (m, 1H), 0.70 – 0.18 (m, 4H).  $^{13}\text{C}$  NMR (100 MHz,  $\text{CDCl}_3$ )  $\delta$  143.6, 139.2, 135.2, 128.5, 128.4, 128.3, 127.2, 123.0, 119.9, 115.3, 114.0, 113.8, 86.0, 83.2, 48.7, 30.7, 7.3. HRMS (ESI)  $m/z$  calcd for  $\text{C}_{26}\text{H}_{24}\text{BrN}_2\text{O}^+ [\text{M} + \text{H}]^+ = 459.1067$ , found = 459.1075.

7-Bromo-2-cyclopropyl-5,5-diphenyl-2,3,5,6-tetrahydro-1H-[1,3]oxazepino[6,5-b]indole 4l:

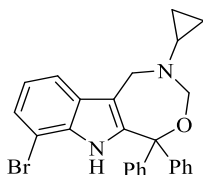

A white solid; 47.0 mg; isolated yield = 57%; m.p. 180.9 -181.6 °C;  $^1\text{H}$  NMR (400 MHz,  $\text{CDCl}_3$ )  $\delta$  7.50 – 7.41 (m, 1H), 7.32 – 7.24 (m, 6H), 7.23 – 7.19 (m, 1H), 7.18 – 7.10 (m, 5H), 6.98 – 6.89 (m, 1H), 4.67 (s, 2H), 4.07 (s, 2H), 2.71 – 2.29 (m, 1H), 0.73 – 0.15 (m, 4H).  $^{13}\text{C}$  NMR (100 MHz,  $\text{CDCl}_3$ )  $\delta$  143.5, 139.2, 133.2, 129.4, 128.5, 128.4, 128.3, 124.2, 120.9, 117.8, 114.9, 104.6, 86.0, 83.2, 49.0, 30.7, 7.3. HRMS (ESI)  $m/z$  calcd for  $\text{C}_{26}\text{H}_{24}\text{BrN}_2\text{O}^+ [\text{M} + \text{H}]^+ = 459.1067$ , found = 459.1074.

2-(4-Methoxyphenyl)-5-methyl-5-phenyl-2,3,5,6-tetrahydro-1H-[1,3]oxazepino[6,5-b]indole 4m:

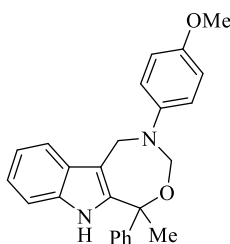

A white solid; 49.1 mg; isolated yield = 71%; m.p. 186.4 -187.2 °C;  $^1\text{H}$  NMR (400 MHz, DMSO)  $\delta$  10.99 (s, 1H), 7.77 – 7.67 (m, 1H), 7.44 – 7.24 (m, 4H), 7.16 – 6.94 (m, 6H), 6.74 – 6.68 (m, 2H), 5.39 (d,  $J = 12.5$  Hz, 1H), 4.94 (d,  $J = 16.2$  Hz, 1H), 4.72 (d,  $J = 12.5$  Hz, 1H), 4.18 (d,  $J = 16.2$  Hz, 1H), 3.61 (s, 3H), 1.87 (s, 3H).  $^{13}\text{C}$  NMR (101 MHz, DMSO)  $\delta$  152.8, 144.7, 142.1, 140.1, 135.2, 128.9, 128.1, 127.4, 126.8, 121.5, 119.5, 118.3, 117.4, 114.6, 111.9, 81.0, 79.6, 55.6, 46.2, 30.5. HRMS (ESI)  $m/z$  calcd for  $\text{C}_{25}\text{H}_{25}\text{N}_2\text{O}_2^+ [\text{M} + \text{H}]^+ = 385.1911$ , found = 385.1908.

6-Methyl-5,5-diphenyl-2-(p-tolyl)-2,3,5,6-tetrahydro-1H-[1,3]oxazepino[6,5-b]indole 4n:



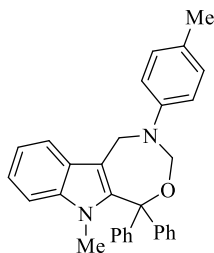

A colorless oil; 60.8 mg; isolated yield = 76%;  $^1\text{H NMR}$  (400 MHz,  $\text{CDCl}_3$ )  $\delta$  7.89 – 7.67 (m, 1H), 7.31 – 6.99 (m, 13H), 6.77 – 6.68 (m, 2H), 6.42 – 6.26 (m, 2H), 5.03 (s, 2H), 4.80 (s, 2H), 2.80 (s, 3H), 2.14 (s, 3H).  $^{13}\text{C NMR}$  (101 MHz,  $\text{CDCl}_3$ )  $\delta$  145.3, 141.0, 140.8, 137.5, 129.4, 129.2, 128.2, 128.1, 128.0, 127.2, 126.1, 121.7, 119.5, 118.1, 114.8, 114.6, 109.2, 86.5, 79.2, 43.7, 31.9, 20.3. HRMS (ESI)  $m/z$  calcd for  $\text{C}_{31}\text{H}_{29}\text{N}_2\text{O}^+$   $[\text{M} + \text{H}]^+ = 445.2274$ , found = 445.2276.

**Diphenyl(3-((phenylamino)methyl)-1H-indol-2-yl)methanol Int-4b:**

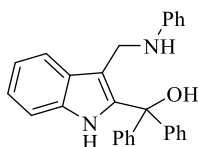

A colorless oil; 97.0 mg; isolated yield = 48%;  $^1\text{H NMR}$  (400 MHz,  $\text{CDCl}_3$ )  $\delta$  7.79 – 7.59 (m, 1H), 7.42 – 7.00 (m, 16H), 6.90 – 6.71 (m, 2H), 6.17 (d,  $J = 7.4$  Hz, 1H), 4.23 (s, 2H), 3.99 (s, 1H).  $^{13}\text{C NMR}$  (100 MHz,  $\text{CDCl}_3$ )  $\delta$  145.4, 144.6, 136.8, 135.7, 135.3, 128.3, 128.2, 127.5, 126.5, 124.1, 123.1, 121.8, 119.3, 118.4, 110.8, 110.6, 69.5, 29.0. HRMS (ESI)  $m/z$  calcd for  $\text{C}_{28}\text{H}_{24}\text{N}_2\text{ONa}^+$   $[\text{M} + \text{Na}]^+ = 427.1781$ , found = 427.1781.

**4-Methyl-2,3,3-triphenyl-1,2,3,4-tetrahydropyrrolo[3,4-b]indole 5b':**

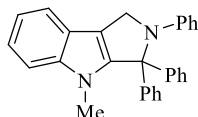

A white solid; 41.6 mg; isolated yield = 52%; m.p. 231.2 -231.9 °C;  $^1\text{H NMR}$  (400 MHz,  $\text{CDCl}_3$ )  $\delta$  7.65 – 7.59 (m, 1H), 7.56 – 7.50 (m, 4H), 7.34 – 7.14 (m, 9H), 7.10 – 7.00 (m, 2H), 6.67 (d,  $J = 8.1$  Hz, 2H), 6.60 (t,  $J = 7.2$  Hz, 1H), 4.96 (s, 2H), 3.29 (s, 3H).  $^{13}\text{C NMR}$  (100 MHz,  $\text{CDCl}_3$ )  $\delta$  147.6, 145.2, 141.4, 139.4, 129.0, 128.4, 128.3, 127.4, 121.9, 121.3, 119.9, 119.2, 116.4, 114.3, 111.2, 109.9, 74.3, 49.4, 30.8. HRMS (ESI)  $m/z$  calcd for  $\text{C}_{29}\text{H}_{25}\text{N}_2^+$   $[\text{M} + \text{H}]^+ = 401.2012$ , found = 401.2020.

**2-(3-Chlorophenyl)-4-methyl-3,3-diphenyl-1,2,3,4-tetrahydropyrrolo[3,4-b]indole 5c':**

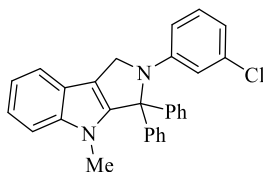

A colorless oil; 51.2 mg; isolated yield = 59%;  $^1\text{H}$  NMR (400 MHz,  $\text{CDCl}_3$ )  $\delta$  7.61 (d,  $J = 6.9$  Hz, 1H), 7.55 – 7.45 (m, 4H), 7.36 – 7.13 (m, 9H), 6.95 – 6.84 (m, 1H), 6.76 – 6.65 (m, 1H), 6.63 – 6.44 (m, 2H), 4.94 (s, 2H), 3.29 (s, 3H).  $^{13}\text{C}$  NMR (100 MHz,  $\text{CDCl}_3$ )  $\delta$  147.2, 146.2, 141.5, 138.8, 134.4, 129.1, 128.9, 128.4, 127.7, 121.8, 121.5, 120.0, 119.2, 116.3, 113.8, 112.6, 110.7, 109.9, 74.5, 49.7, 30.9. HRMS (ESI)  $m/z$  calcd for  $\text{C}_{29}\text{H}_{24}\text{ClN}_2^+$   $[\text{M} + \text{H}]^+ = 435.1623$ , found = 435.1621.

**2-(4-Chlorophenyl)-4-methyl-3,3-diphenyl-1,2,3,4-tetrahydropyrrolo[3,4-*b*]indole 5 d':**

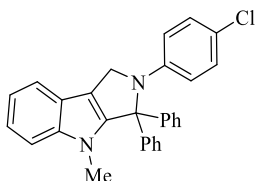

A white solid; 46.0 mg; isolated yield = 53%; m.p. 228.1 -228.7 °C;  $^1\text{H}$  NMR (400 MHz,  $\text{CDCl}_3$ )  $\delta$  7.65 – 7.57 (m, 1H), 7.54 – 7.45 (m, 4H), 7.37 – 7.14 (m, 9H), 6.98 (d,  $J = 9.1$  Hz, 2H), 6.57 (d,  $J = 9.1$  Hz, 2H), 4.93 (s, 2H), 3.29 (s, 3H).  $^{13}\text{C}$  NMR (100 MHz,  $\text{CDCl}_3$ )  $\delta$  147.4, 143.7, 141.5, 139.0, 128.9, 128.4, 128.3, 127.6, 121.8, 121.4, 121.4, 120.0, 119.2, 115.3, 110.9, 109.9, 74.4, 49.6, 30.8. HRMS (ESI)  $m/z$  calcd for  $\text{C}_{29}\text{H}_{24}\text{ClN}_2^+$   $[\text{M} + \text{H}]^+ = 435.1623$ , found = 435.1631.

**2-(4-Bromophenyl)-4-methyl-3,3-diphenyl-1,2,3,4-tetrahydropyrrolo[3,4-*b*]indole 5 e':**

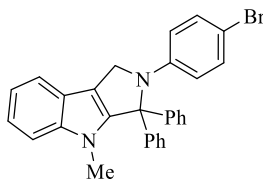

A colorless oil; 45.9 mg; isolated yield = 48%;  $^1\text{H}$  NMR (400 MHz,  $\text{CDCl}_3$ )  $\delta$  7.60 (d,  $J = 7.2$  Hz, 1H), 7.50 (d,  $J = 7.5$  Hz, 4H), 7.33 – 7.08 (m, 11H), 6.53 (d,  $J = 9.0$  Hz, 2H), 4.92 (s, 2H), 3.28 (s, 3H).  $^{13}\text{C}$  NMR (100 MHz,  $\text{CDCl}_3$ )  $\delta$  147.4, 144.1, 141.5, 139.0, 131.1, 128.9, 128.4, 127.7, 121.8, 121.5, 120.0, 119.2, 115.8, 110.9, 109.9, 108.7, 74.4, 49.6, 30.9. HRMS (ESI)  $m/z$  calcd for  $\text{C}_{29}\text{H}_{24}\text{BrN}_2^+$   $[\text{M} + \text{H}]^+ = 479.1118$ , found = 479.1125.

**2-(4-Chlorophenyl)-4-methyl-3,3-di-*p*-tolyl-1,2,3,4-tetrahydropyrrolo[3,4-*b*]indole 5 f':**

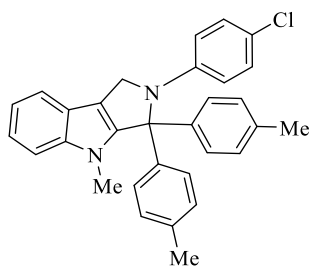

A white solid; 47.1 mg; isolated yield = 51%; m.p. 183.7 -184.5 °C; <sup>1</sup>H NMR (400 MHz, CDCl<sub>3</sub>) δ 7.59 (d, *J* = 6.9 Hz, 1H), 7.37 (d, *J* = 8.2 Hz, 4H), 7.25 – 7.06 (m, 7H), 6.97 (d, *J* = 9.0 Hz, 2H), 6.57 (d, *J* = 9.0 Hz, 2H), 4.90 (s, 2H), 3.28 (s, 3H), 2.29 (s, 6H). <sup>13</sup>C NMR (100 MHz, CDCl<sub>3</sub>) δ 147.7, 143.8, 141.5, 137.3, 136.1, 129.1, 128.9, 128.2, 121.9, 121.3, 121.2, 119.9, 119.2, 115.2, 110.7, 109.9, 74.1, 49.6, 30.8, 21.1. HRMS (ESI) *m/z* calcd for C<sub>31</sub>H<sub>28</sub>ClN<sub>2</sub><sup>+</sup> [M + H]<sup>+</sup> = 463.1936, found = 463.1930.

2,3,3-Tris(4-chlorophenyl)-4-methyl-1,2,3,4-tetrahydropyrrolo[3,4-*b*]indole **5g'**:

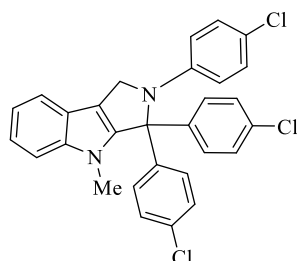

A colorless oil; 54.2 mg; isolated yield = 54%; <sup>1</sup>H NMR (400 MHz, CDCl<sub>3</sub>) δ 7.61 (d, *J* = 7.6 Hz, 1H), 7.39 (d, *J* = 8.7 Hz, 4H), 7.31 – 7.15 (m, 7H), 7.00 (d, *J* = 9.0 Hz, 2H), 6.52 (d, *J* = 9.1 Hz, 2H), 4.90 (s, 2H), 3.29 (s, 3H). <sup>13</sup>C NMR (100 MHz, CDCl<sub>3</sub>) δ 146.2, 143.2, 141.5, 137.3, 133.8, 130.1, 128.7, 128.5, 122.2, 121.9, 121.7, 120.2, 119.3, 115.5, 111.4, 110.0, 73.6, 49.6, 30.9. HRMS (ESI) *m/z* calcd for C<sub>29</sub>H<sub>22</sub>Cl<sub>3</sub>N<sub>2</sub><sup>+</sup> [M + H]<sup>+</sup> = 503.0843, found = 503.0846.

2-(4-Chlorophenyl)-4,7-dimethyl-3,3-diphenyl-1,2,3,4-tetrahydropyrrolo[3,4-*b*]indole **5h'**:

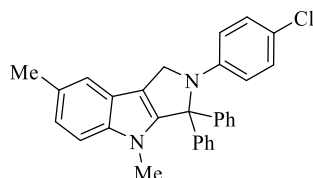

A white solid; 50.2 mg; isolated yield = 56%; m.p. 219.7 -220.3 °C; <sup>1</sup>H NMR (400 MHz, CDCl<sub>3</sub>) δ 7.53 – 7.44 (m, 4H), 7.42 – 7.20 (m, 7H), 7.16 – 7.08 (m, 1H), 7.06 – 6.94 (m, 3H), 6.69 – 6.44 (m, 2H), 4.89 (s, 2H), 3.26 (s, 3H), 2.47 (s, 3H). <sup>13</sup>C NMR (101 MHz, CDCl<sub>3</sub>) δ 147.4, 143.7, 139.9, 139.1, 129.3, 128.9, 128.4, 128.2, 127.6, 122.9, 121.9, 121.3, 118.9, 115.2, 110.4, 109.6, 74.4, 49.6, 30.8, 21.4. HRMS (ESI) *m/z* calcd for C<sub>30</sub>H<sub>26</sub>ClN<sub>2</sub><sup>+</sup> [M + H]<sup>+</sup> = 449.1779, found = 449.1773.

## 4. X-ray single crystal data for compounds

### Compound 3a:

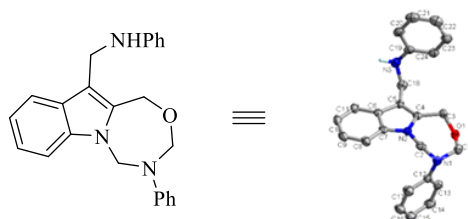

CCDC: 2312830 for 3a

**Table S1 Crystal data and structure refinement for 202305104\_auto.**

|                                             |                                                               |
|---------------------------------------------|---------------------------------------------------------------|
| Identification code                         | 202305104_auto                                                |
| Empirical formula                           | C <sub>24</sub> H <sub>23</sub> N <sub>3</sub> O              |
| Formula weight                              | 369.45                                                        |
| Temperature/K                               | 293(2)                                                        |
| Crystal system                              | monoclinic                                                    |
| Space group                                 | P2 <sub>1</sub> /c                                            |
| a/Å                                         | 8.5178(5)                                                     |
| b/Å                                         | 24.0991(12)                                                   |
| c/Å                                         | 9.5851(5)                                                     |
| α/°                                         | 90                                                            |
| β/°                                         | 103.099(5)                                                    |
| γ/°                                         | 90                                                            |
| Volume/Å <sup>3</sup>                       | 1916.34(18)                                                   |
| Z                                           | 4                                                             |
| ρ <sub>calc</sub> /cm <sup>3</sup>          | 1.281                                                         |
| μ/mm <sup>-1</sup>                          | 0.625                                                         |
| F(000)                                      | 784.0                                                         |
| Crystal size/mm <sup>3</sup>                | 0.16 × 0.11 × 0.1                                             |
| Radiation                                   | CuKα (λ = 1.54184)                                            |
| 2θ range for data collection/°              | 7.336 to 134.16                                               |
| Index ranges                                | -10 ≤ h ≤ 6, -28 ≤ k ≤ 28, -10 ≤ l ≤ 11                       |
| Reflections collected                       | 6618                                                          |
| Independent reflections                     | 3401 [R <sub>int</sub> = 0.0339, R <sub>sigma</sub> = 0.0490] |
| Data/restraints/parameters                  | 3401/0/257                                                    |
| Goodness-of-fit on F <sup>2</sup>           | 1.034                                                         |
| Final R indexes [I ≥ 2σ (I)]                | R <sub>1</sub> = 0.0488, wR <sub>2</sub> = 0.1210             |
| Final R indexes [all data]                  | R <sub>1</sub> = 0.0739, wR <sub>2</sub> = 0.1385             |
| Largest diff. peak/hole / e Å <sup>-3</sup> | 0.14/-0.16                                                    |

### Compound 3b:

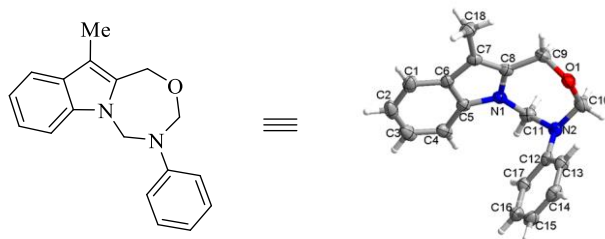

CCDC: 2312831 for **3b**

**Table S2 Crystal data and structure refinement for 202305125\_auto.**

|                                             |                                                               |
|---------------------------------------------|---------------------------------------------------------------|
| Identification code                         | 202305125_auto                                                |
| Empirical formula                           | C <sub>18</sub> H <sub>18</sub> N <sub>2</sub> O              |
| Formula weight                              | 278.34                                                        |
| Temperature/K                               | 293(2)                                                        |
| Crystal system                              | monoclinic                                                    |
| Space group                                 | C2/c                                                          |
| a/Å                                         | 15.8575(6)                                                    |
| b/Å                                         | 12.2410(4)                                                    |
| c/Å                                         | 14.9618(6)                                                    |
| α/°                                         | 90                                                            |
| β/°                                         | 90.113(4)                                                     |
| γ/°                                         | 90                                                            |
| Volume/Å <sup>3</sup>                       | 2904.24(18)                                                   |
| Z                                           | 8                                                             |
| ρ <sub>calc</sub> /cm <sup>3</sup>          | 1.273                                                         |
| μ/mm <sup>-1</sup>                          | 0.628                                                         |
| F(000)                                      | 1184.0                                                        |
| Crystal size/mm <sup>3</sup>                | 0.18 × 0.12 × 0.1                                             |
| Radiation                                   | CuKα (λ = 1.54184)                                            |
| 2θ range for data collection/°              | 9.126 to 134.13                                               |
| Index ranges                                | -16 ≤ h ≤ 18, -8 ≤ k ≤ 14, -17 ≤ l ≤ 17                       |
| Reflections collected                       | 5200                                                          |
| Independent reflections                     | 2520 [R <sub>int</sub> = 0.0219, R <sub>sigma</sub> = 0.0288] |
| Data/restraints/parameters                  | 2520/0/191                                                    |
| Goodness-of-fit on F <sup>2</sup>           | 1.051                                                         |
| Final R indexes [I >= 2σ (I)]               | R <sub>1</sub> = 0.0477, wR <sub>2</sub> = 0.1242             |
| Final R indexes [all data]                  | R <sub>1</sub> = 0.0615, wR <sub>2</sub> = 0.1377             |
| Largest diff. peak/hole / e Å <sup>-3</sup> | 0.12/-0.17                                                    |

## Compound 4b:

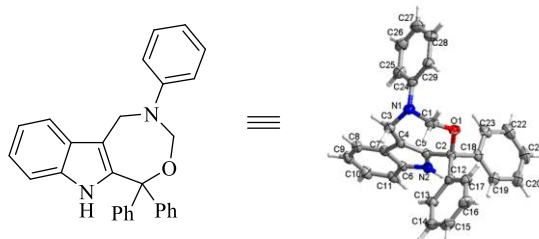

CCDC: 2312832 for 4b

**Table S3 Crystal data and structure refinement for 202308209\_auto.**

|                                             |                                                               |
|---------------------------------------------|---------------------------------------------------------------|
| Identification code                         | 202308209_auto                                                |
| Empirical formula                           | C <sub>61</sub> H <sub>55</sub> N <sub>4</sub> O <sub>2</sub> |
| Formula weight                              | 876.09                                                        |
| Temperature/K                               | 293(2)                                                        |
| Crystal system                              | triclinic                                                     |
| Space group                                 | P-1                                                           |
| a/Å                                         | 10.5803(4)                                                    |
| b/Å                                         | 12.2092(5)                                                    |
| c/Å                                         | 19.4505(8)                                                    |
| α/°                                         | 81.720(4)                                                     |
| β/°                                         | 79.349(4)                                                     |
| γ/°                                         | 73.665(4)                                                     |
| Volume/Å <sup>3</sup>                       | 2358.29(18)                                                   |
| Z                                           | 2                                                             |
| ρ <sub>calc</sub> /cm <sup>3</sup>          | 1.234                                                         |
| μ/mm <sup>-1</sup>                          | 0.578                                                         |
| F(000)                                      | 930.0                                                         |
| Crystal size/mm <sup>3</sup>                | 0.18 × 0.13 × 0.1                                             |
| Radiation                                   | CuKα (λ = 1.54184)                                            |
| 2θ range for data collection/°              | 7.582 to 134.156                                              |
| Index ranges                                | -9 ≤ h ≤ 12, -12 ≤ k ≤ 14, -20 ≤ l ≤ 23                       |
| Reflections collected                       | 16507                                                         |
| Independent reflections                     | 8342 [R <sub>int</sub> = 0.0289, R <sub>sigma</sub> = 0.0433] |
| Data/restraints/parameters                  | 8342/19/605                                                   |
| Goodness-of-fit on F <sup>2</sup>           | 1.021                                                         |
| Final R indexes [I >= 2σ (I)]               | R <sub>1</sub> = 0.0531, wR <sub>2</sub> = 0.1386             |
| Final R indexes [all data]                  | R <sub>1</sub> = 0.0705, wR <sub>2</sub> = 0.1532             |
| Largest diff. peak/hole / e Å <sup>-3</sup> | 0.31/-0.26                                                    |

## Compound 5d:

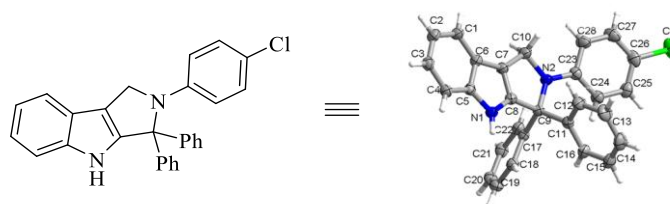

CCDC: 2312833 for **5d**

**Table S4 Crystal data and structure refinement for 202309232.**

|                                             |                                                               |
|---------------------------------------------|---------------------------------------------------------------|
| Identification code                         | 202309232                                                     |
| Empirical formula                           | C <sub>32</sub> H <sub>31</sub> ClN <sub>2</sub> O            |
| Formula weight                              | 495.04                                                        |
| Temperature/K                               | 293(2)                                                        |
| Crystal system                              | triclinic                                                     |
| Space group                                 | P-1                                                           |
| a/Å                                         | 9.9507(5)                                                     |
| b/Å                                         | 10.9932(4)                                                    |
| c/Å                                         | 13.1900(8)                                                    |
| α/°                                         | 87.051(4)                                                     |
| β/°                                         | 68.775(5)                                                     |
| γ/°                                         | 84.170(4)                                                     |
| Volume/Å <sup>3</sup>                       | 1337.86(12)                                                   |
| Z                                           | 2                                                             |
| ρ <sub>calc</sub> /cm <sup>3</sup>          | 1.229                                                         |
| μ/mm <sup>-1</sup>                          | 1.463                                                         |
| F(000)                                      | 524.0                                                         |
| Crystal size/mm <sup>3</sup>                | 0.15 × 0.11 × 0.08                                            |
| Radiation                                   | CuKα (λ = 1.54184)                                            |
| 2θ range for data collection/°              | 7.19 to 134.158                                               |
| Index ranges                                | -11 ≤ h ≤ 11, -13 ≤ k ≤ 11, -15 ≤ l ≤ 15                      |
| Reflections collected                       | 9187                                                          |
| Independent reflections                     | 4752 [R <sub>int</sub> = 0.0255, R <sub>sigma</sub> = 0.0399] |
| Data/restraints/parameters                  | 4752/3/335                                                    |
| Goodness-of-fit on F <sup>2</sup>           | 1.035                                                         |
| Final R indexes [I ≥ 2σ (I)]                | R <sub>1</sub> = 0.0513, wR <sub>2</sub> = 0.1351             |
| Final R indexes [all data]                  | R <sub>1</sub> = 0.0665, wR <sub>2</sub> = 0.1512             |
| Largest diff. peak/hole / e Å <sup>-3</sup> | 0.23/-0.23                                                    |

## 5. NMR Spectra

**3a**  $^1\text{H}$  NMR (400 MHz,  $\text{CDCl}_3$ )

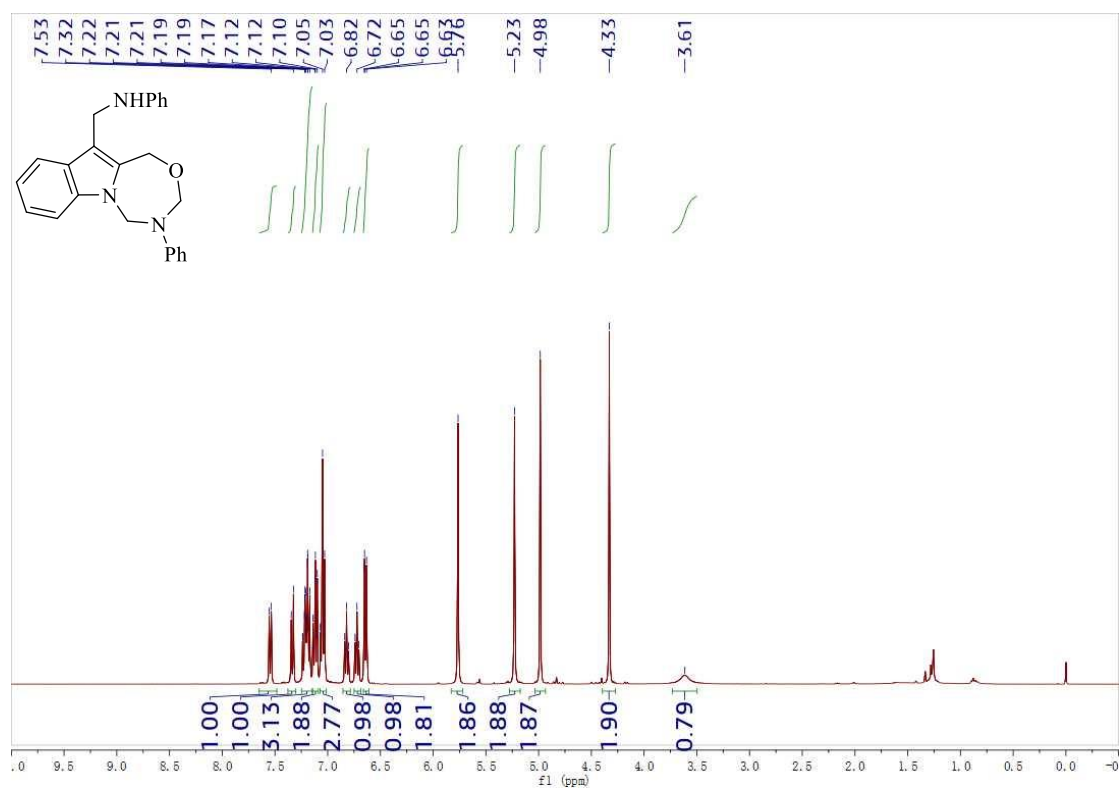

**3a**  $^{13}\text{C}$  NMR (100 MHz,  $\text{CDCl}_3$ )

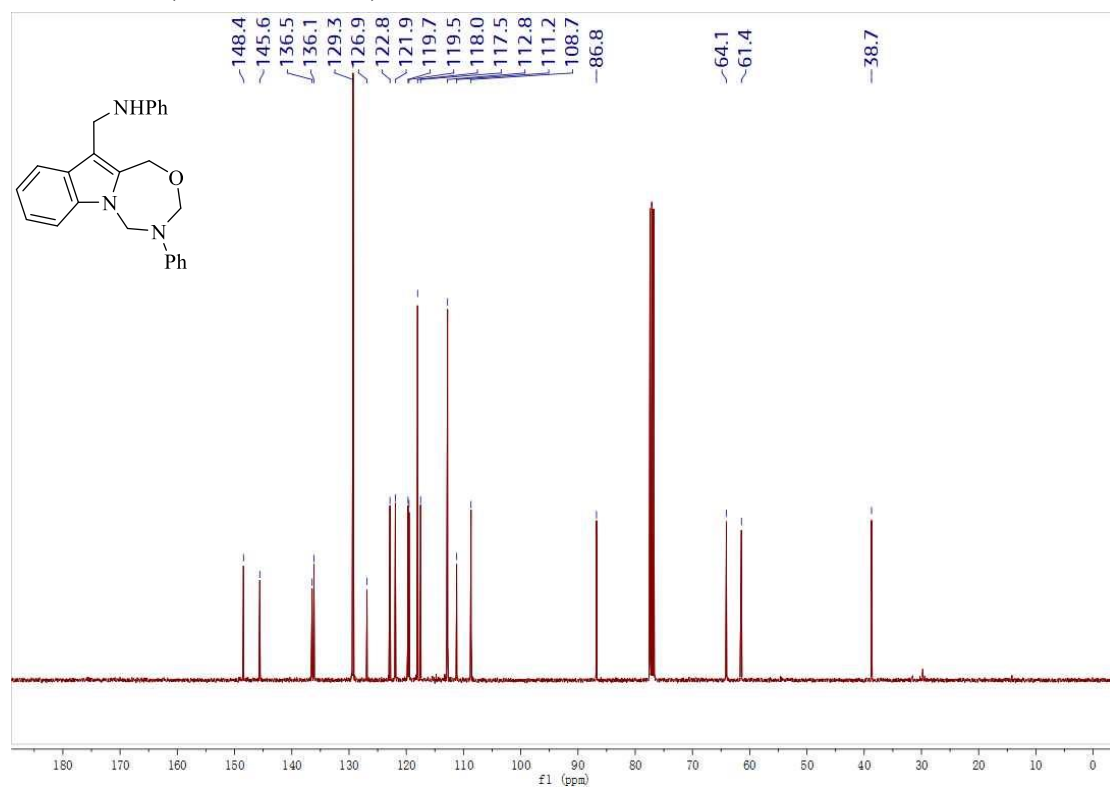



**3b**  $^1\text{H}$  NMR (400 MHz,  $\text{CDCl}_3$ )

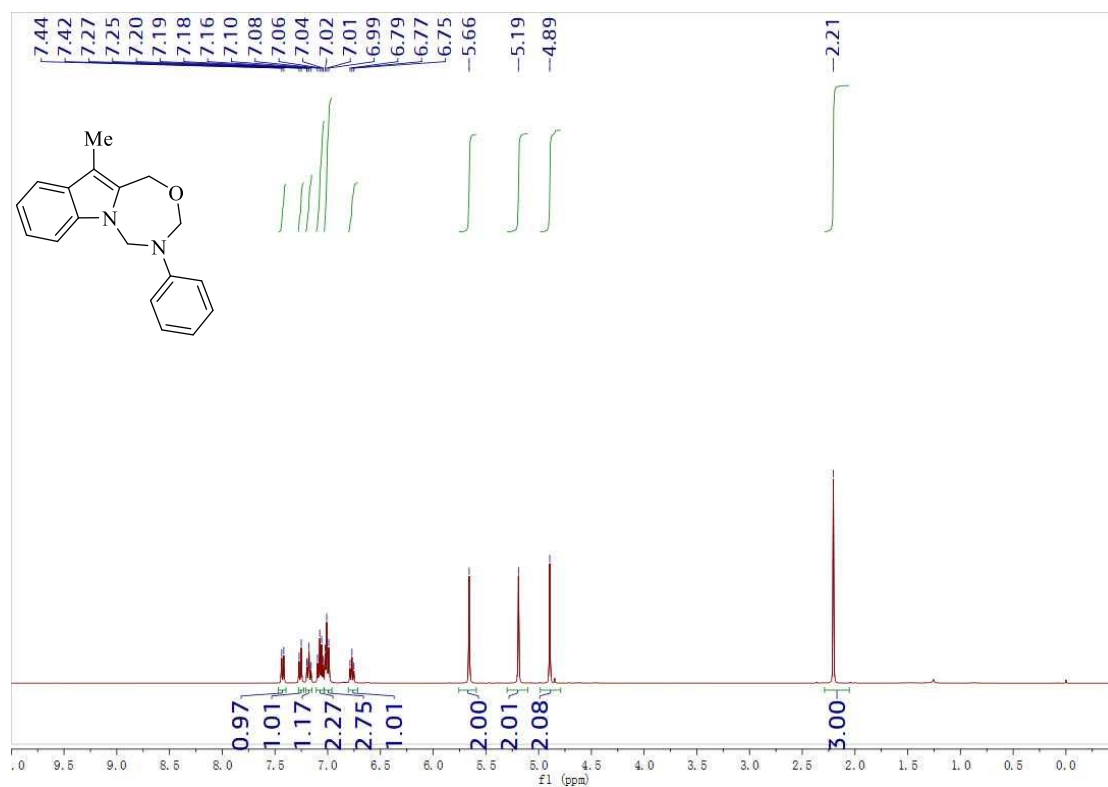

**3b**  $^{13}\text{C}$  NMR (100 MHz,  $\text{CDCl}_3$ )

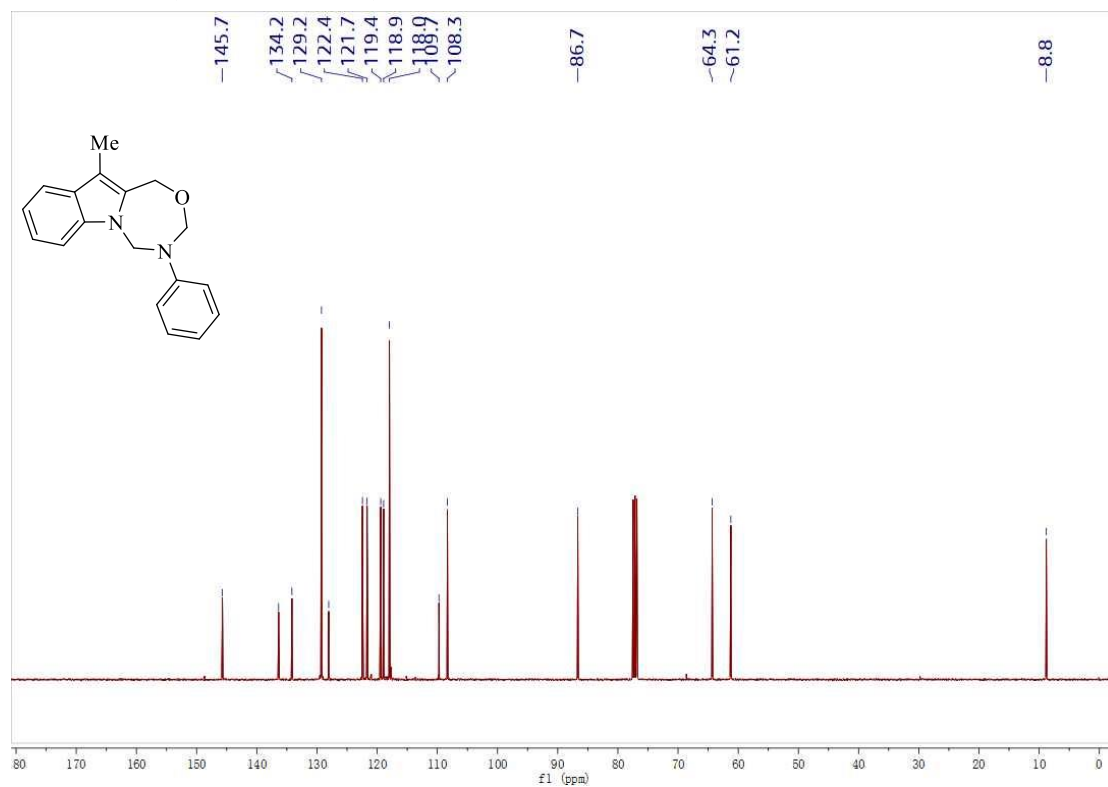

**3c** <sup>1</sup>H NMR (400 MHz, CDCl<sub>3</sub>)

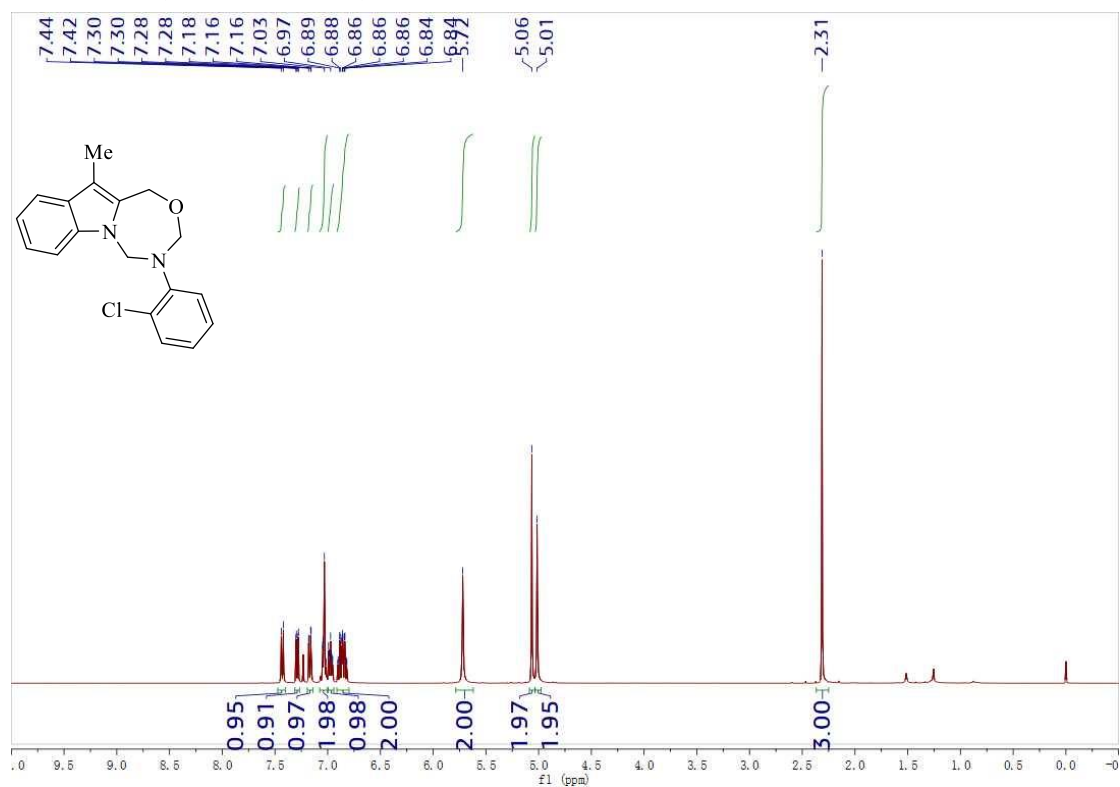

**3c** <sup>13</sup>C NMR (100 MHz, CDCl<sub>3</sub>)

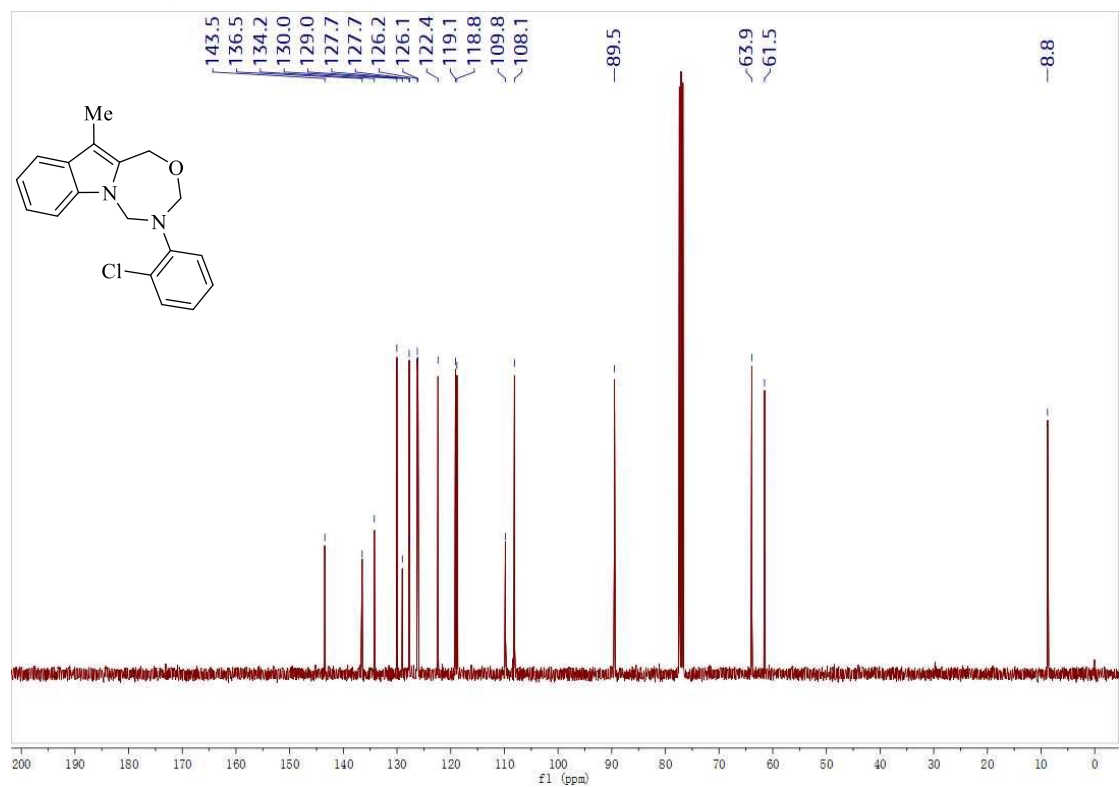

**3d**  $^1\text{H}$  NMR (400 MHz,  $\text{CDCl}_3$ )

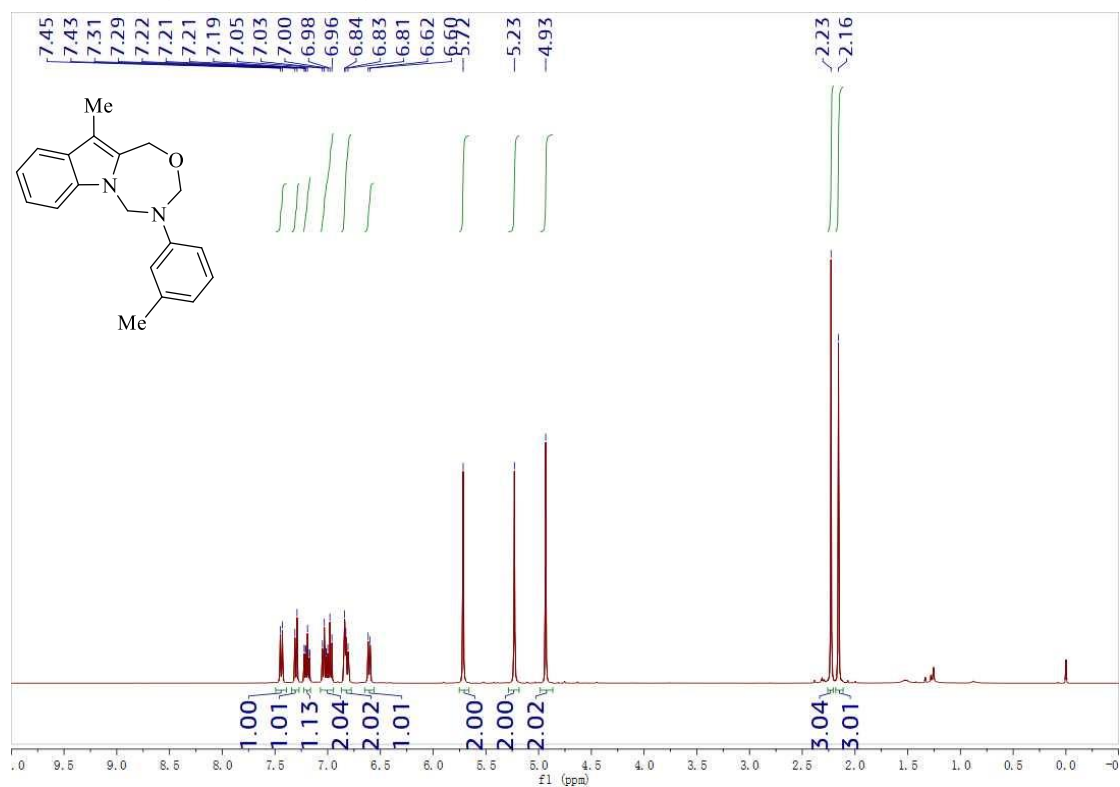

**3d**  $^{13}\text{C}$  NMR (100 MHz,  $\text{CDCl}_3$ )

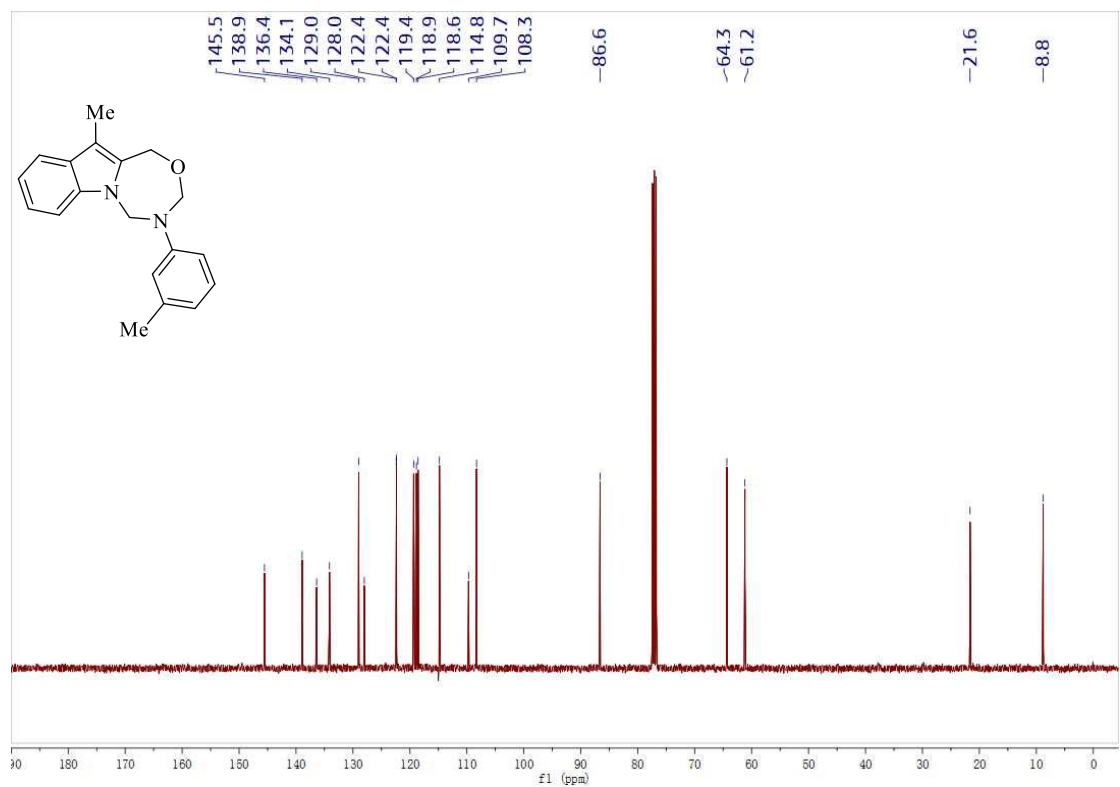

**3e** <sup>1</sup>H NMR (400 MHz, CDCl<sub>3</sub>)

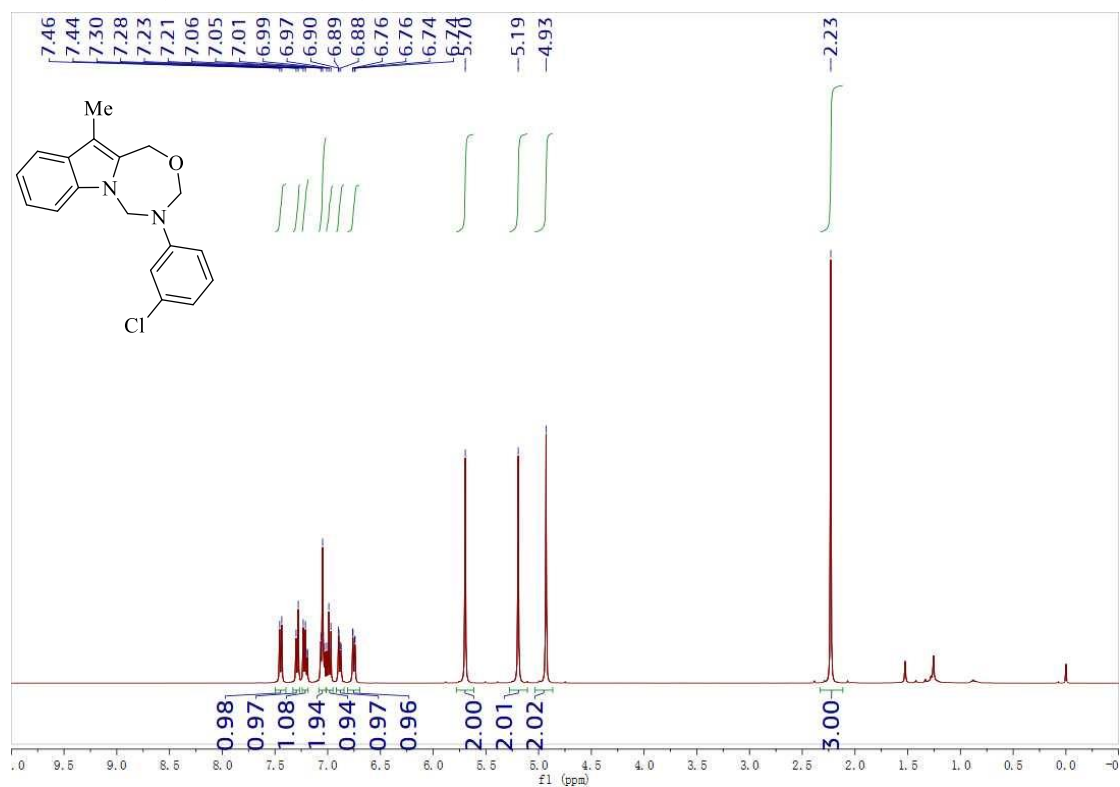

**3e** <sup>13</sup>C NMR (100 MHz, CDCl<sub>3</sub>)

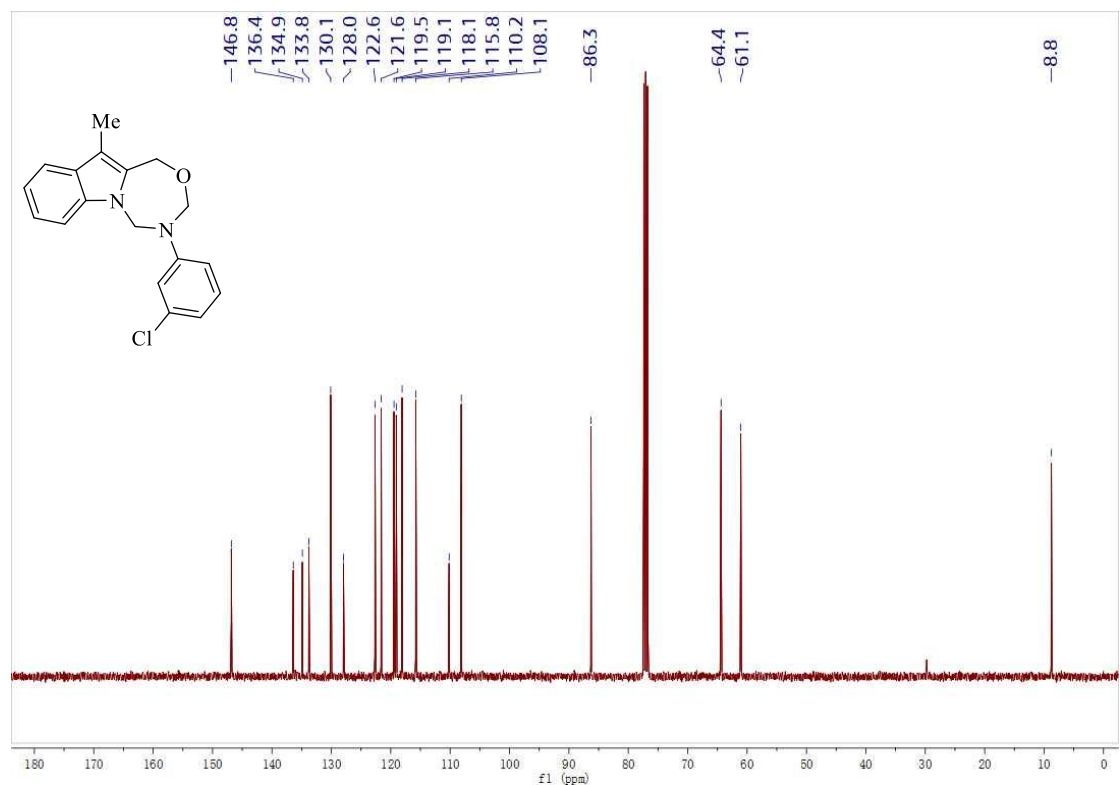

**3f** <sup>1</sup>H NMR (400 MHz, CDCl<sub>3</sub>)

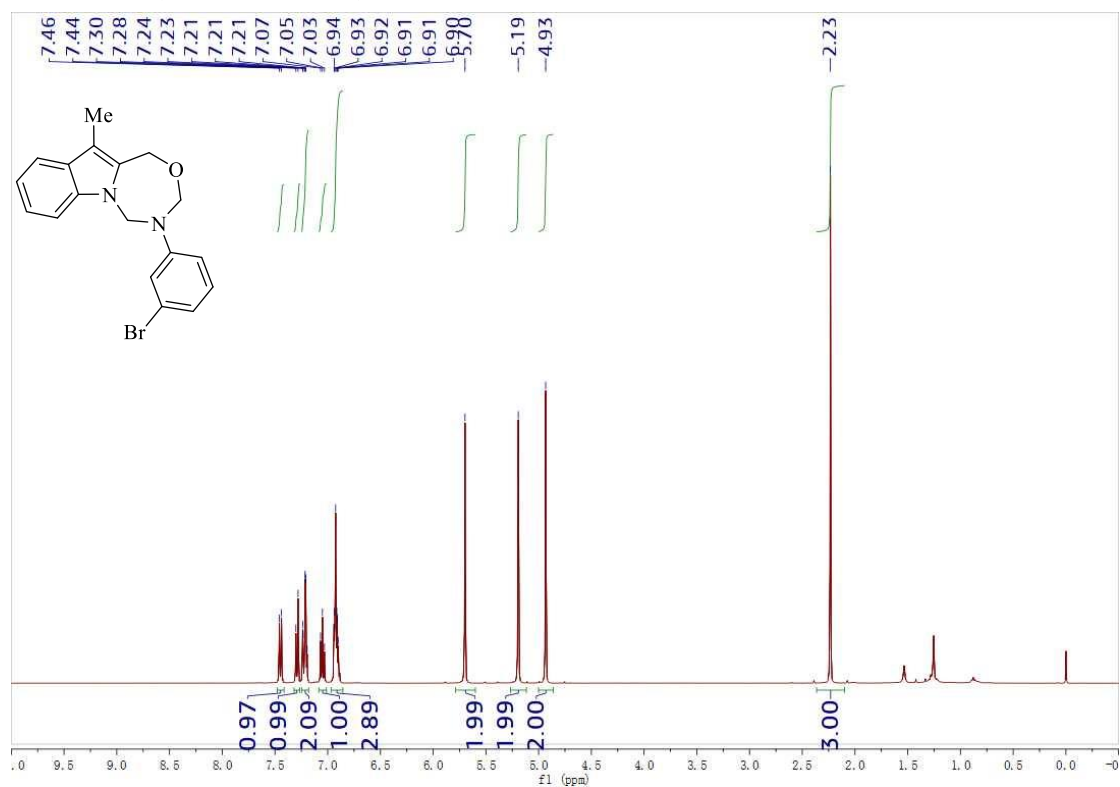

**3f** <sup>13</sup>C NMR (100 MHz, CDCl<sub>3</sub>)

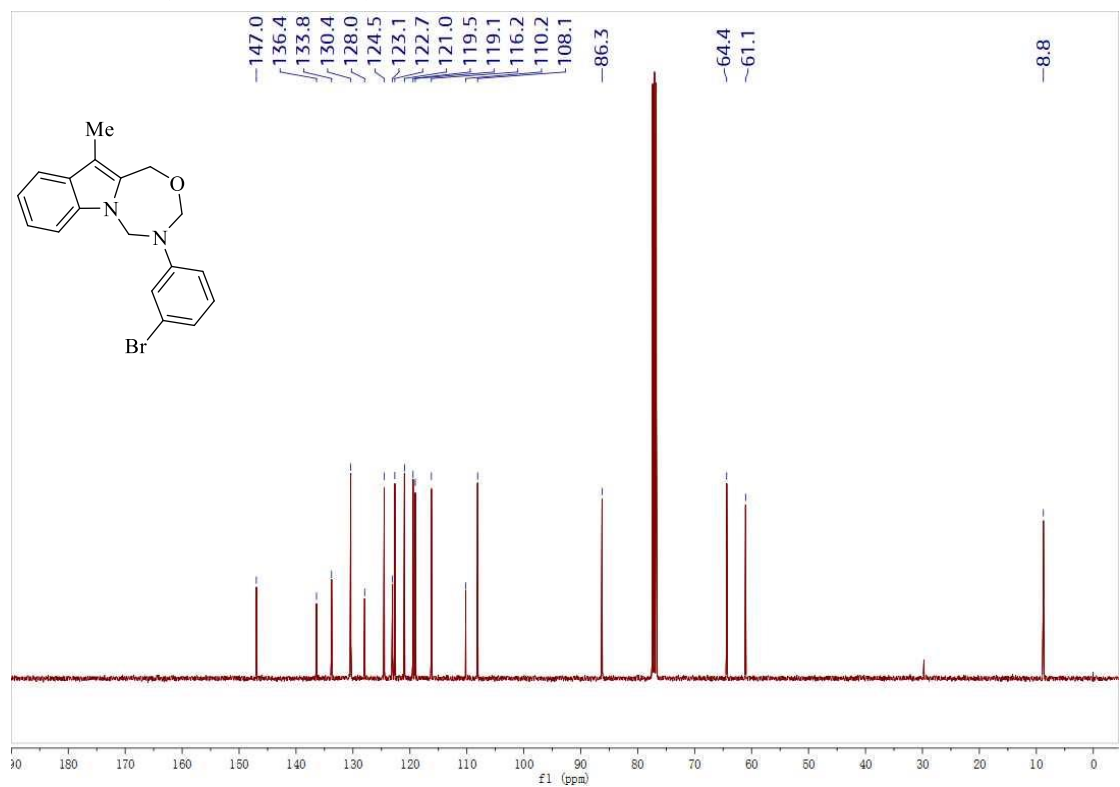

**3g**  $^1\text{H}$  NMR (400 MHz,  $\text{CDCl}_3$ )

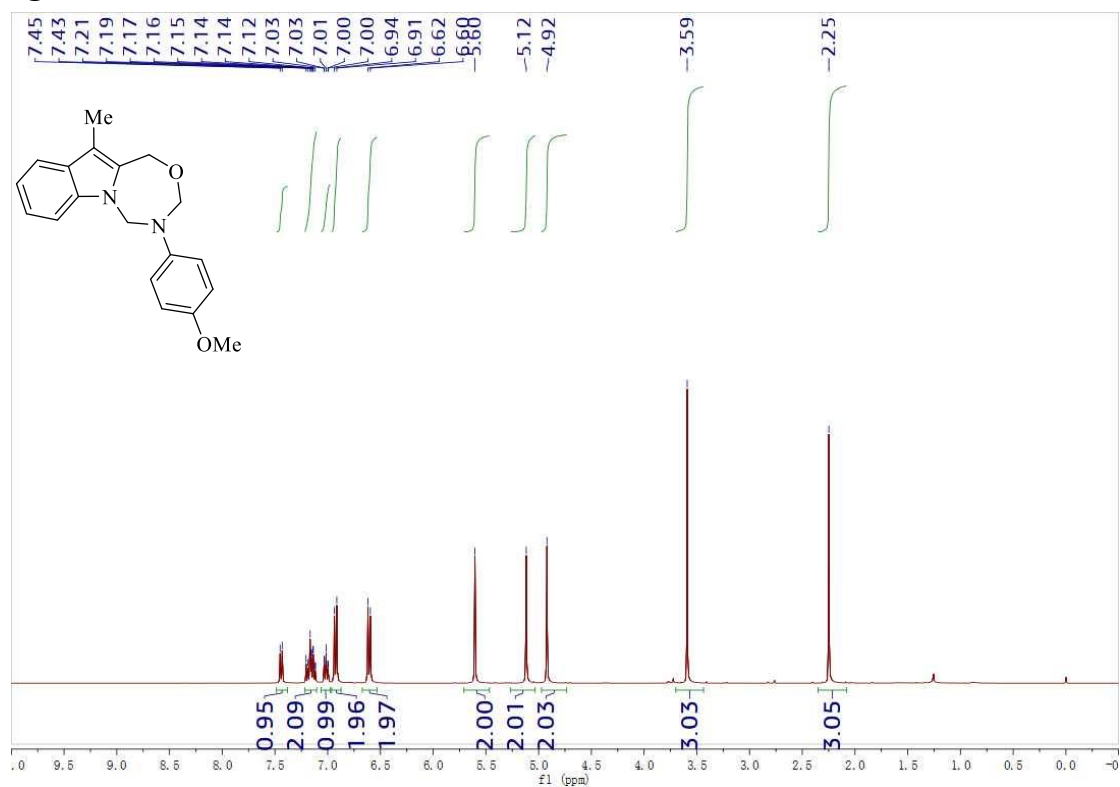

**3g**  $^{13}\text{C}$  NMR (100 MHz,  $\text{CDCl}_3$ )

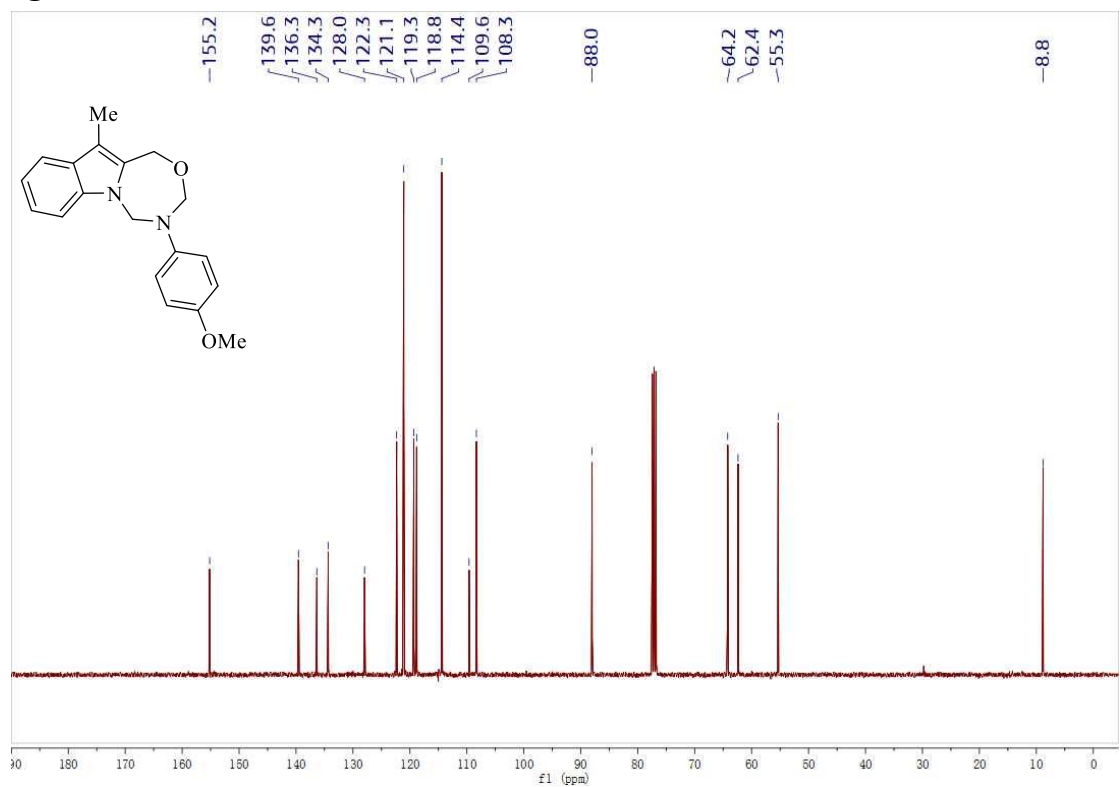

**3h**  $^1\text{H}$  NMR (400 MHz,  $\text{CDCl}_3$ )

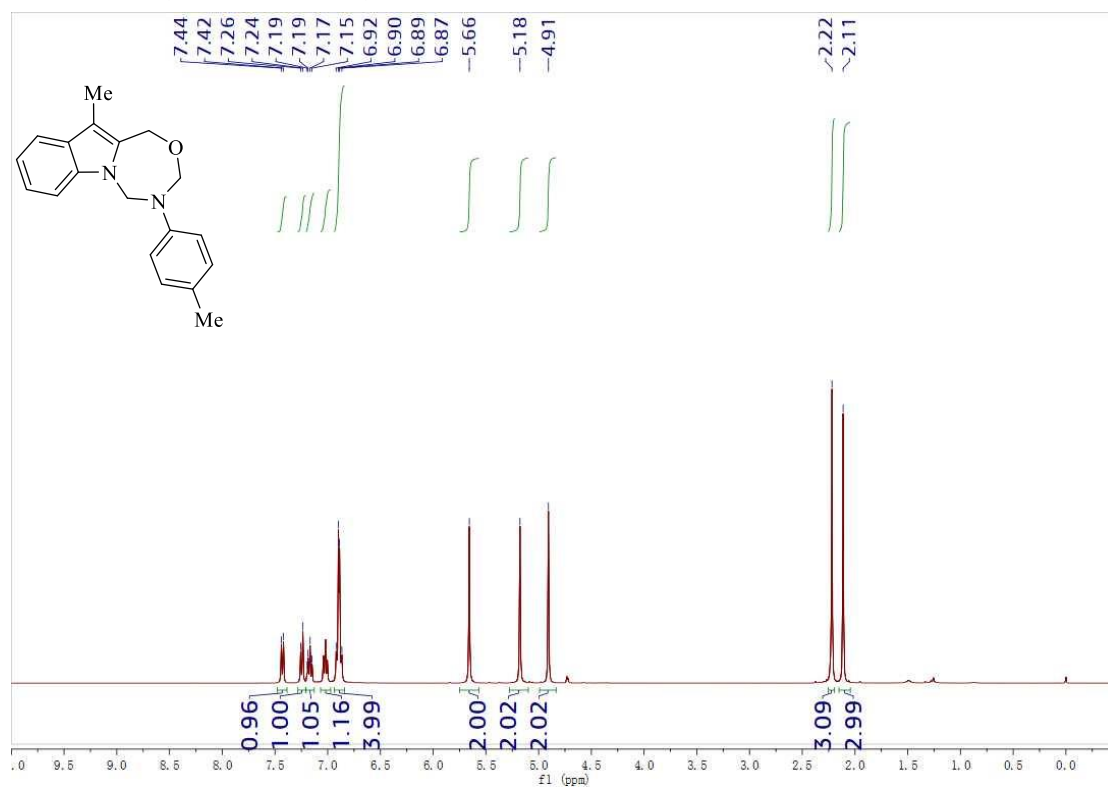

**3h**  $^{13}\text{C}$  NMR (100 MHz,  $\text{CDCl}_3$ )

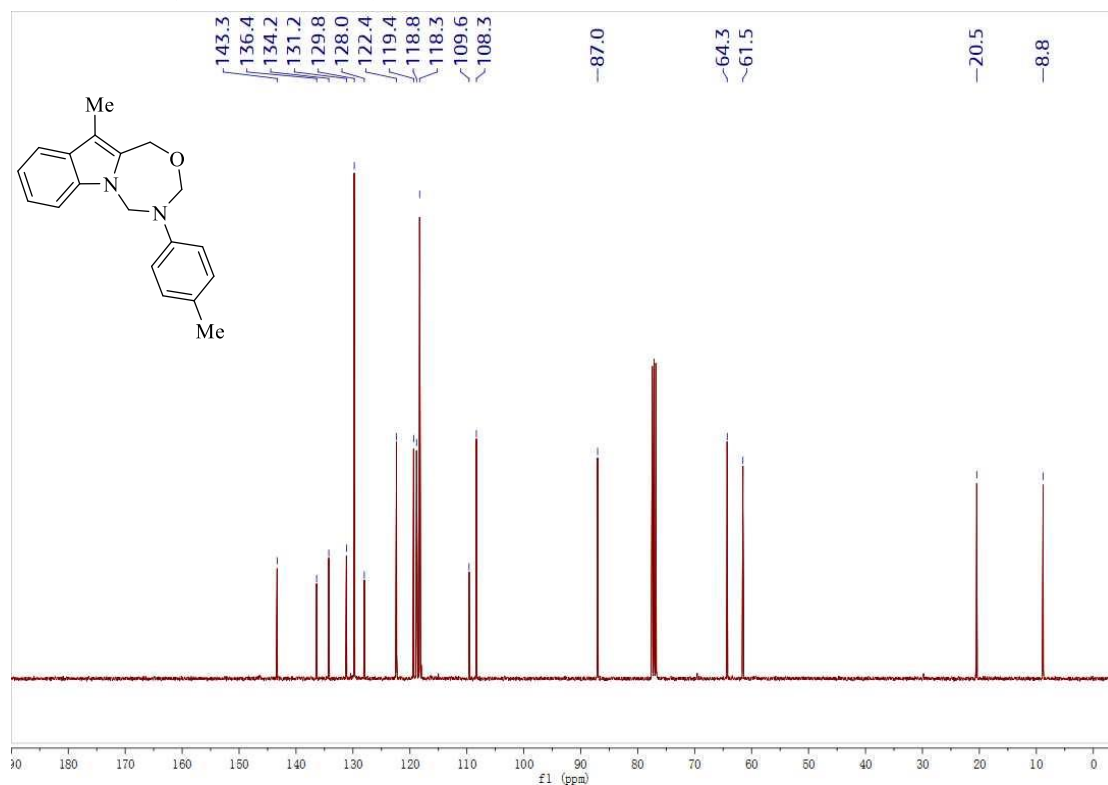

**3i** <sup>1</sup>H NMR (400 MHz, CDCl<sub>3</sub>)

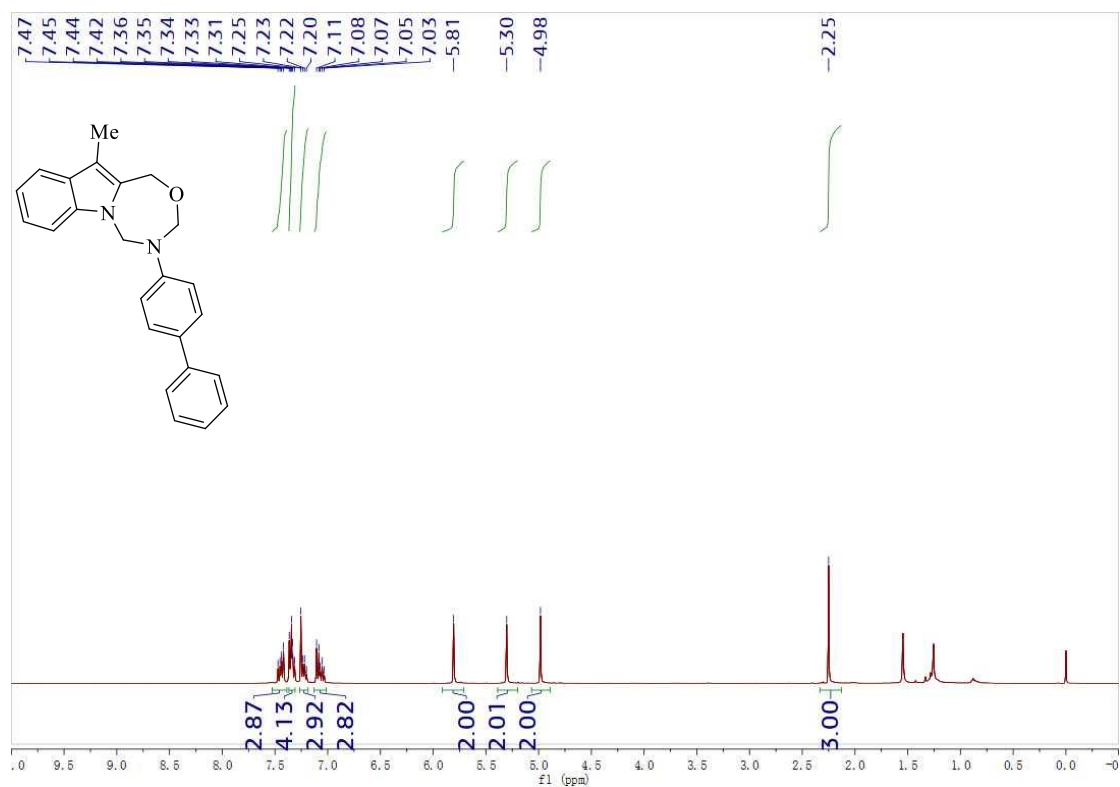

**3i** <sup>13</sup>C NMR (100 MHz, CDCl<sub>3</sub>)

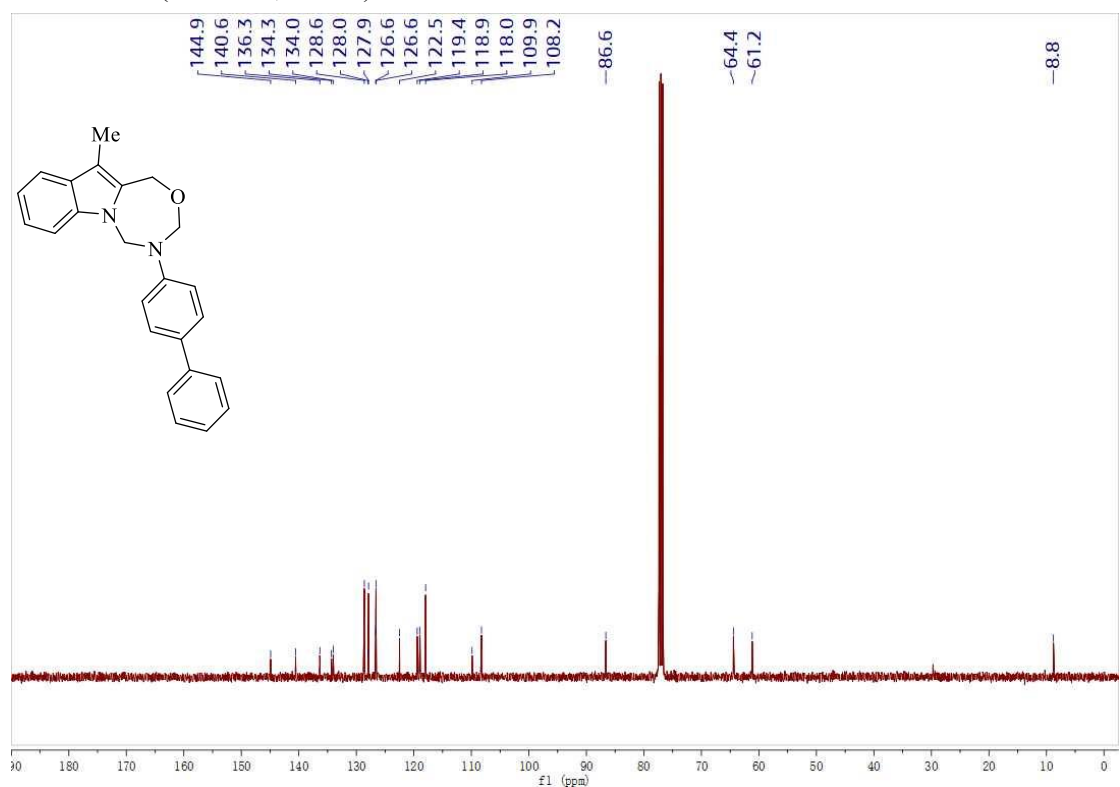



**3j**  $^1\text{H}$  NMR (400 MHz,  $\text{CDCl}_3$ )

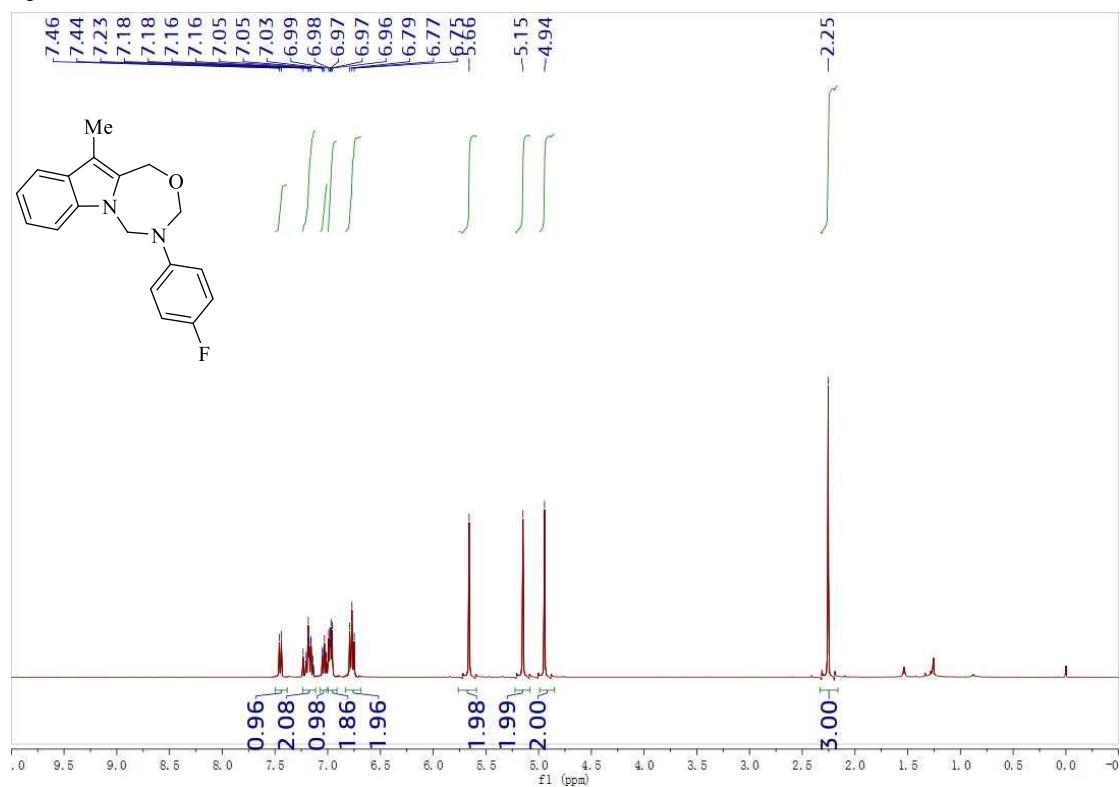

**3j**  $^{13}\text{C}$  NMR (100 MHz,  $\text{CDCl}_3$ )

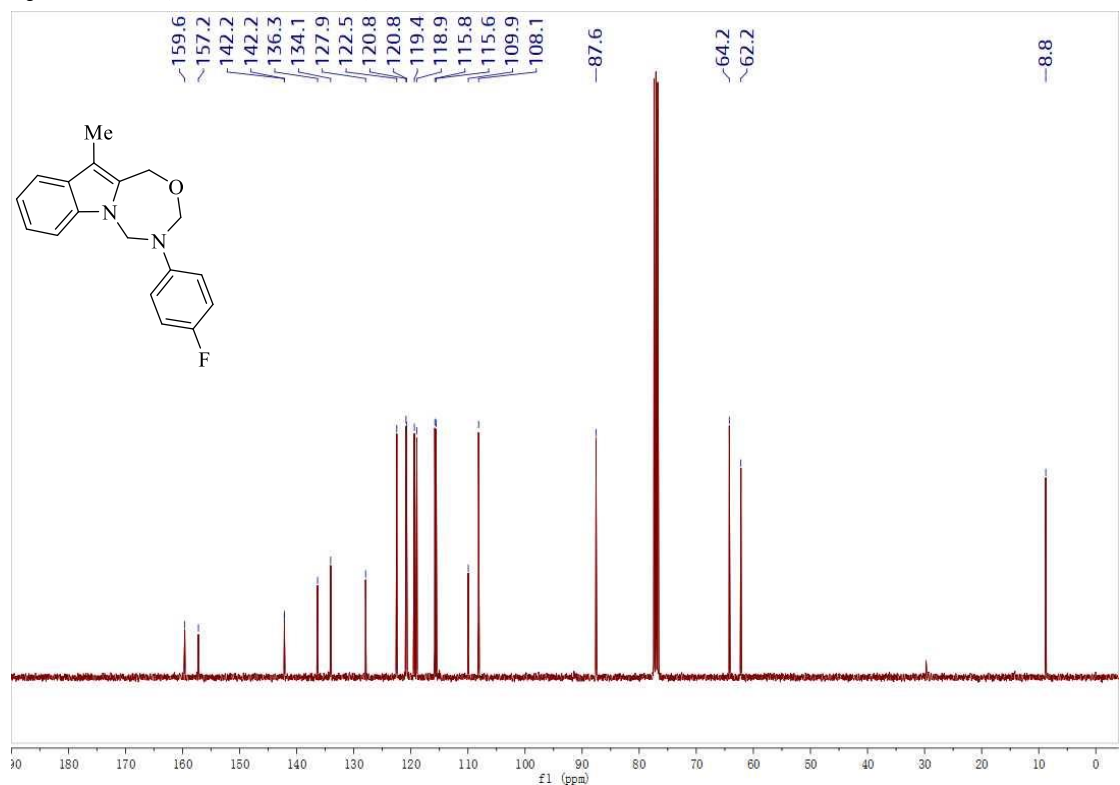

**3j**  $^{19}\text{F}$  NMR (376 MHz,  $\text{CDCl}_3$ )

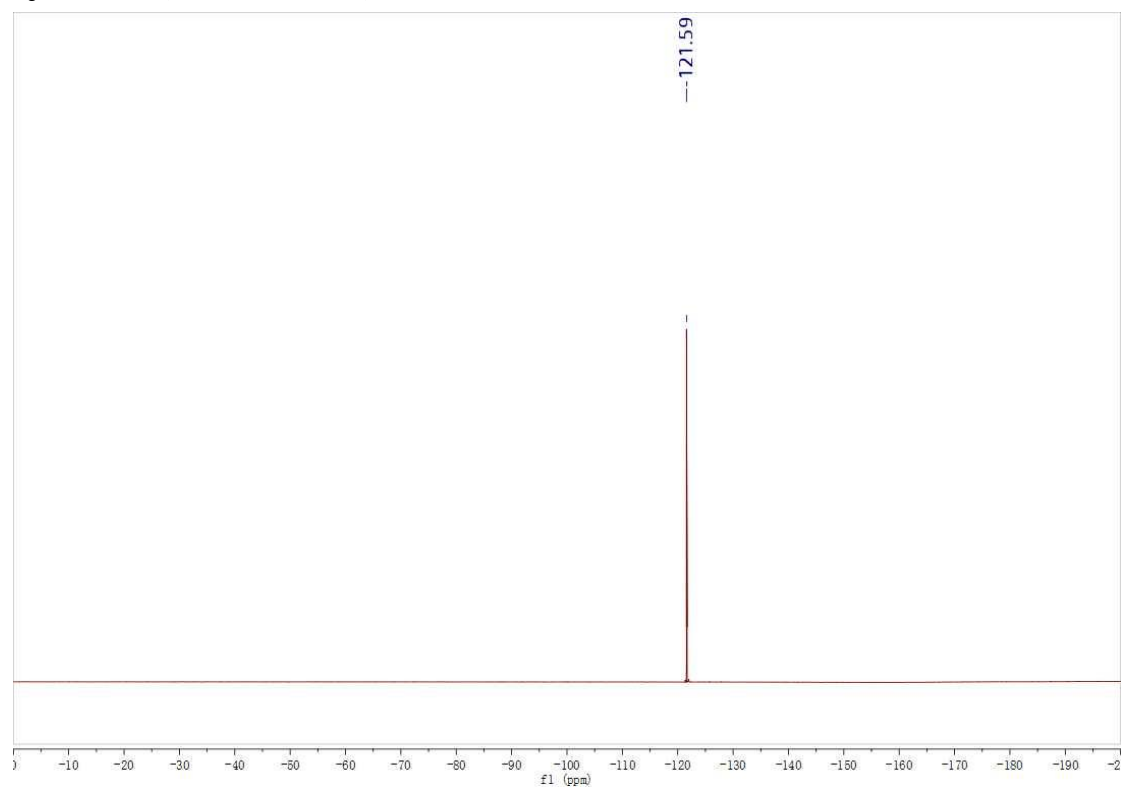

**3k**  $^1\text{H}$  NMR (400 MHz,  $\text{CDCl}_3$ )

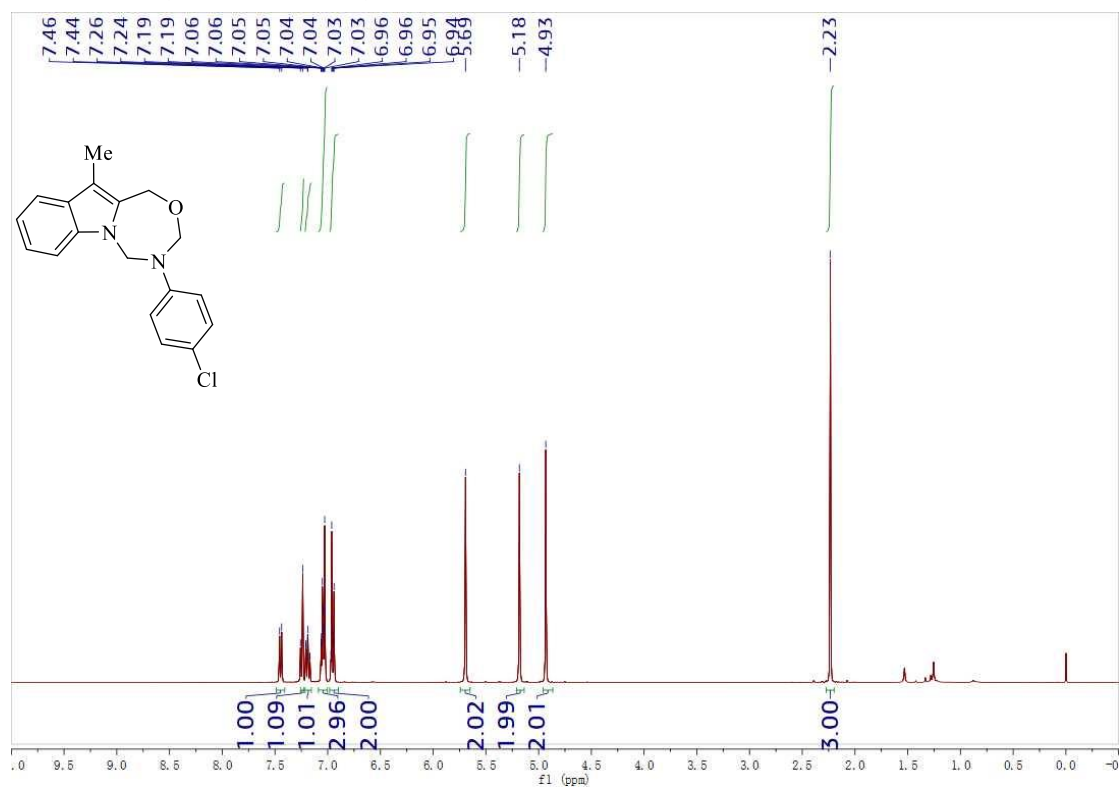

**3k**  $^{13}\text{C}$  NMR (100 MHz,  $\text{CDCl}_3$ )

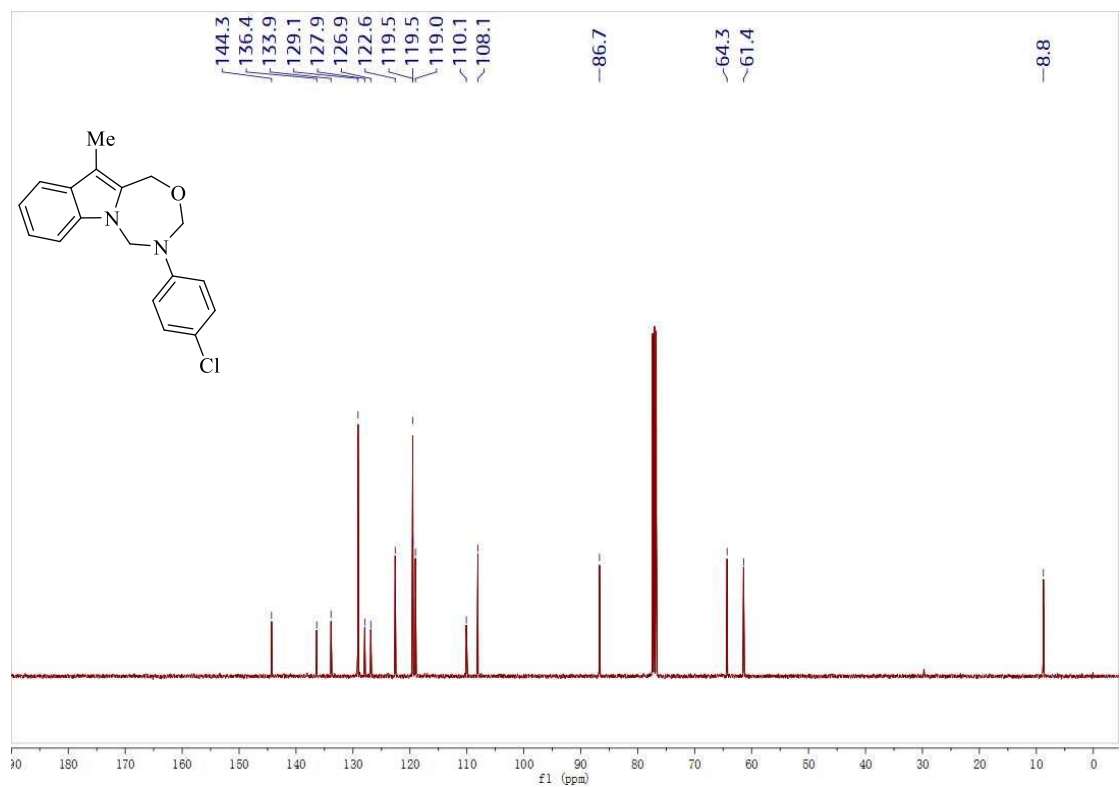

**31**  $^1\text{H}$  NMR (400 MHz,  $\text{CDCl}_3$ )

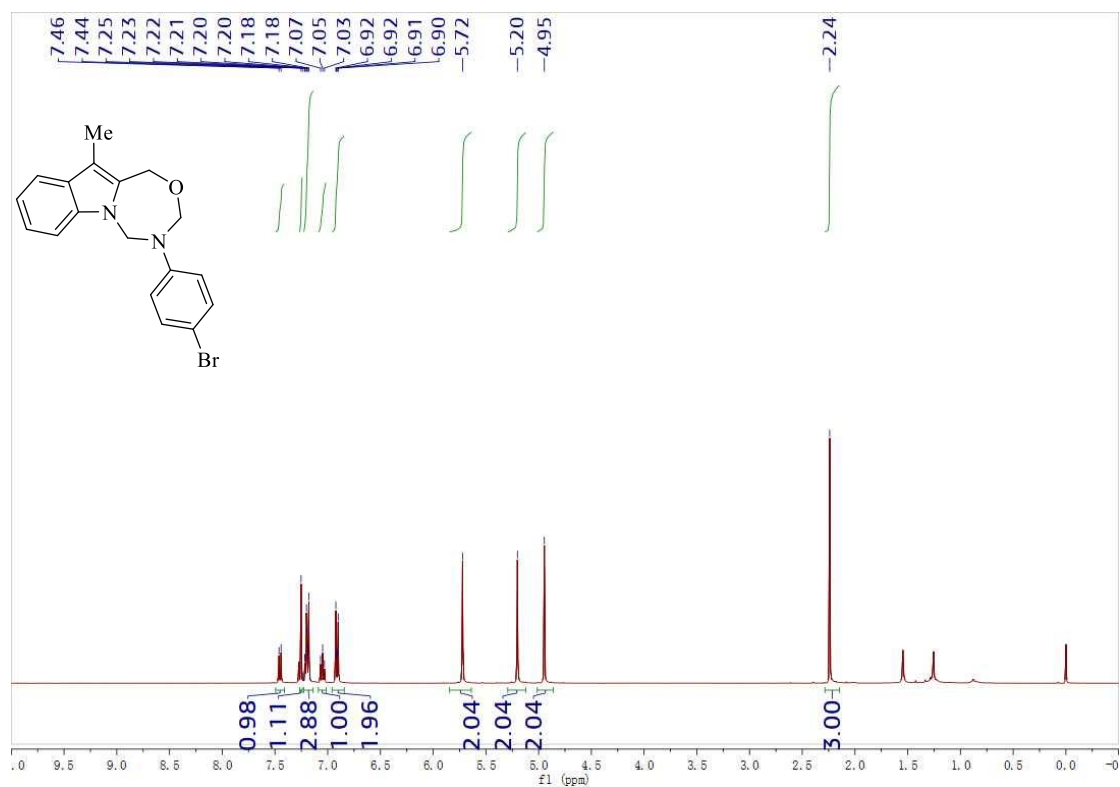

**31**  $^{13}\text{C}$  NMR (100 MHz,  $\text{CDCl}_3$ )

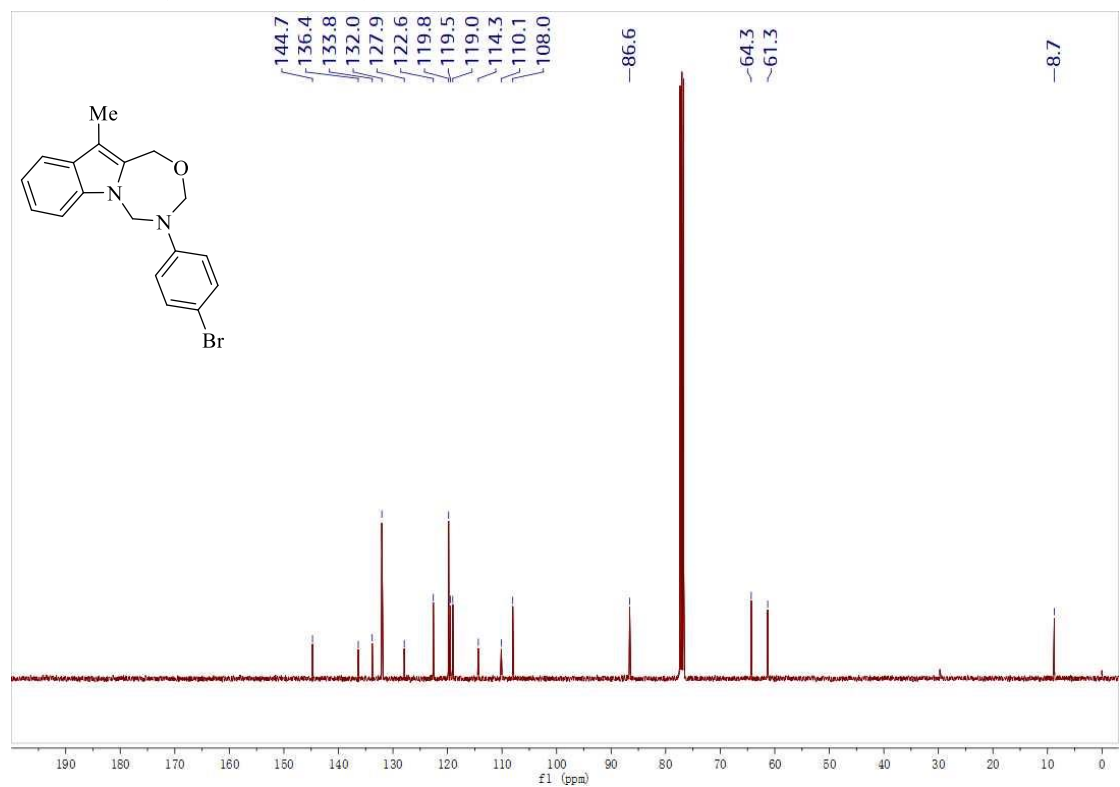

**3m**  $^1\text{H}$  NMR (400 MHz,  $\text{CDCl}_3$ )

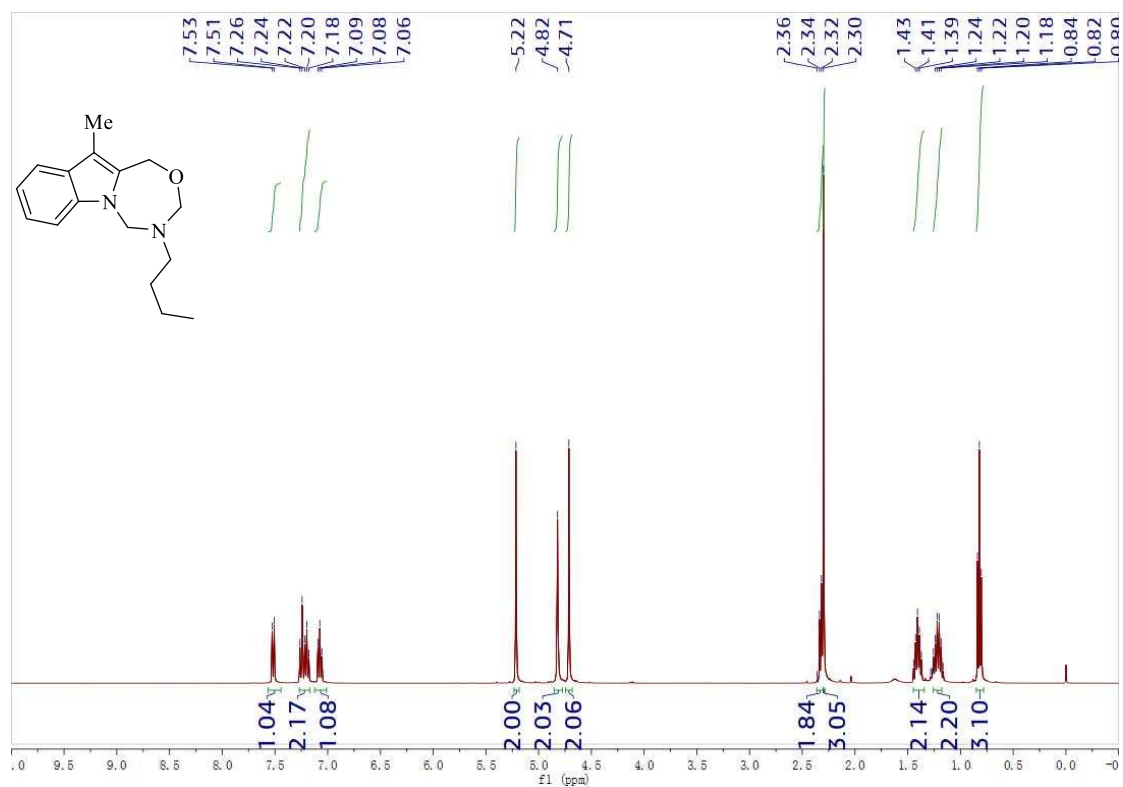

**3m**  $^{13}\text{C}$  NMR (100 MHz,  $\text{CDCl}_3$ )

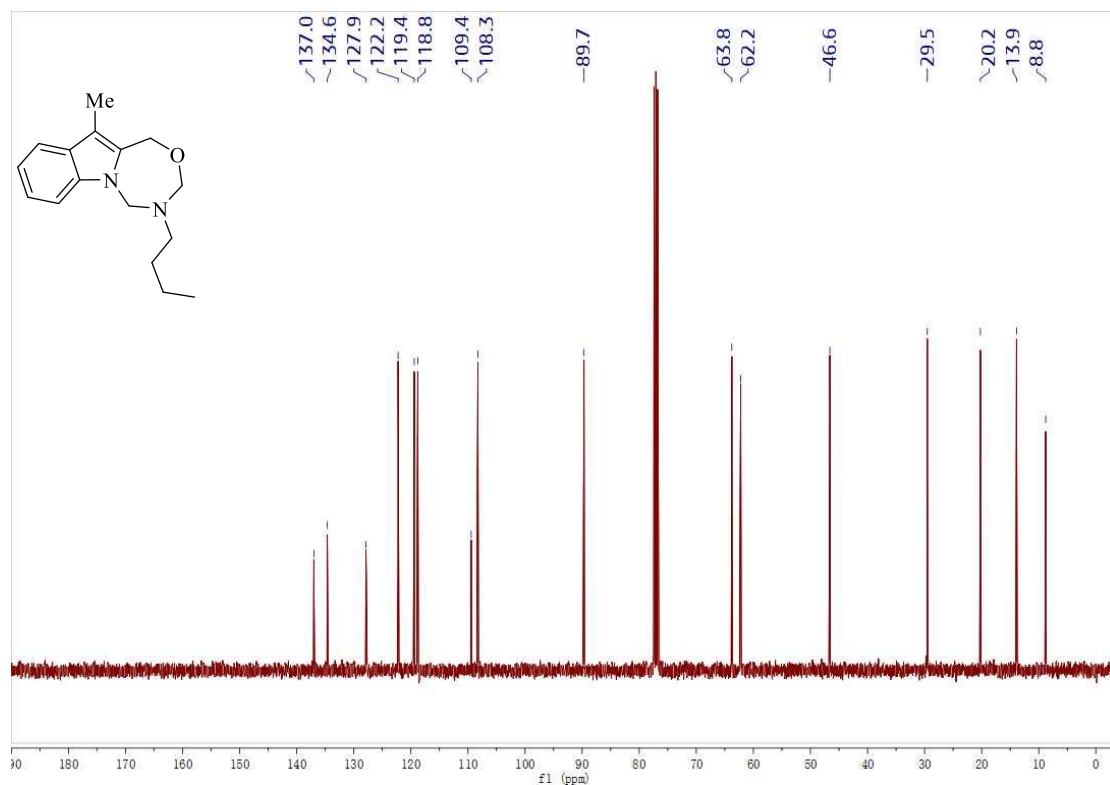

**3n**  $^1\text{H}$  NMR (400 MHz,  $\text{CDCl}_3$ )

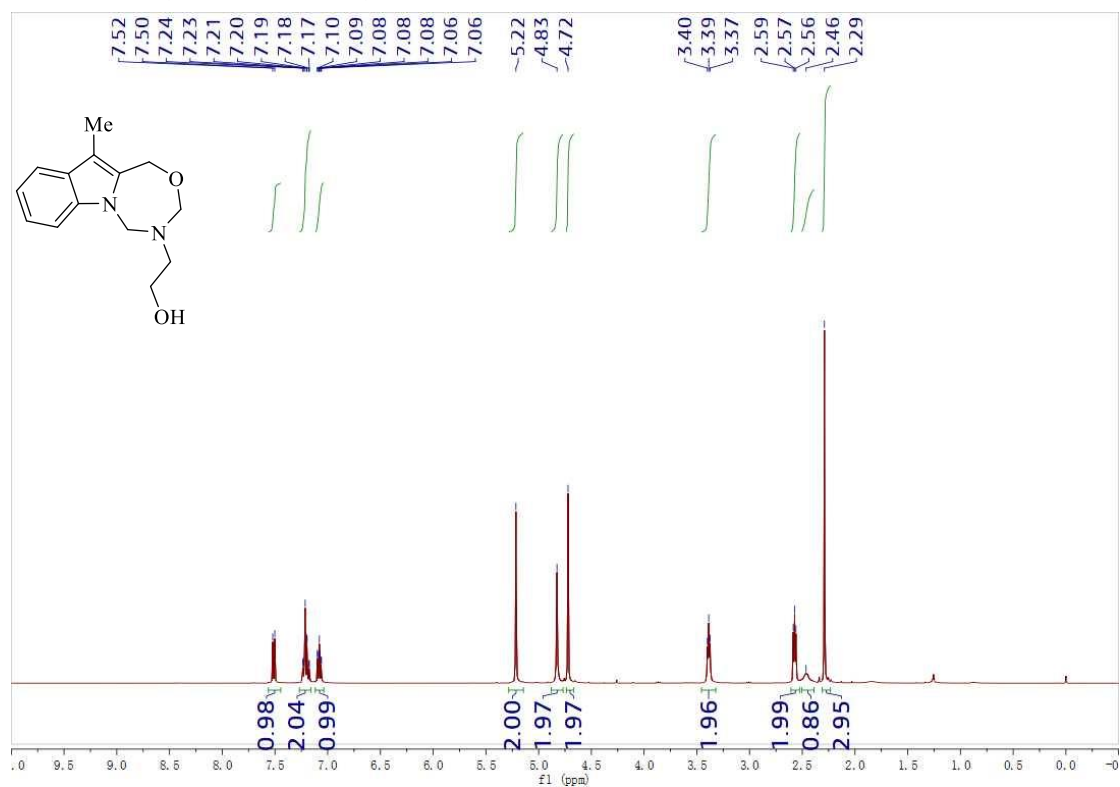

**3n**  $^{13}\text{C}$  NMR (100 MHz,  $\text{CDCl}_3$ )

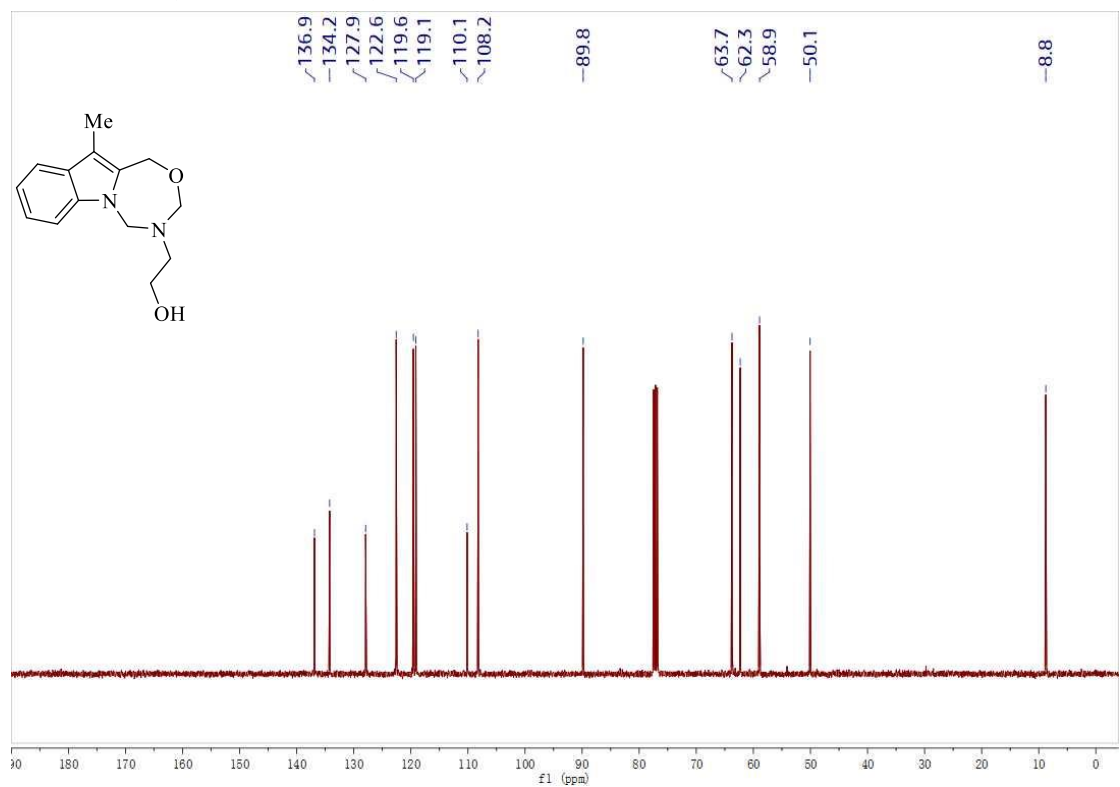

**3o**  $^1\text{H}$  NMR (400 MHz,  $\text{CDCl}_3$ )

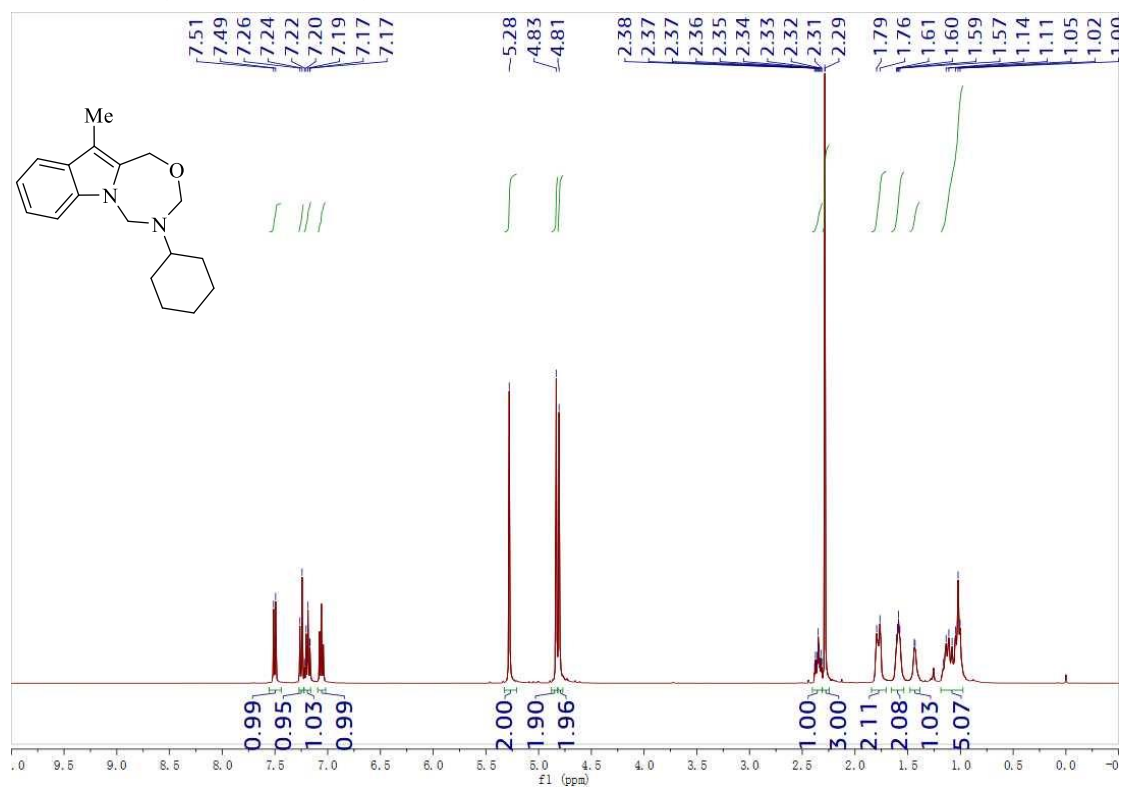

**3o**  $^{13}\text{C}$  NMR (100 MHz,  $\text{CDCl}_3$ )

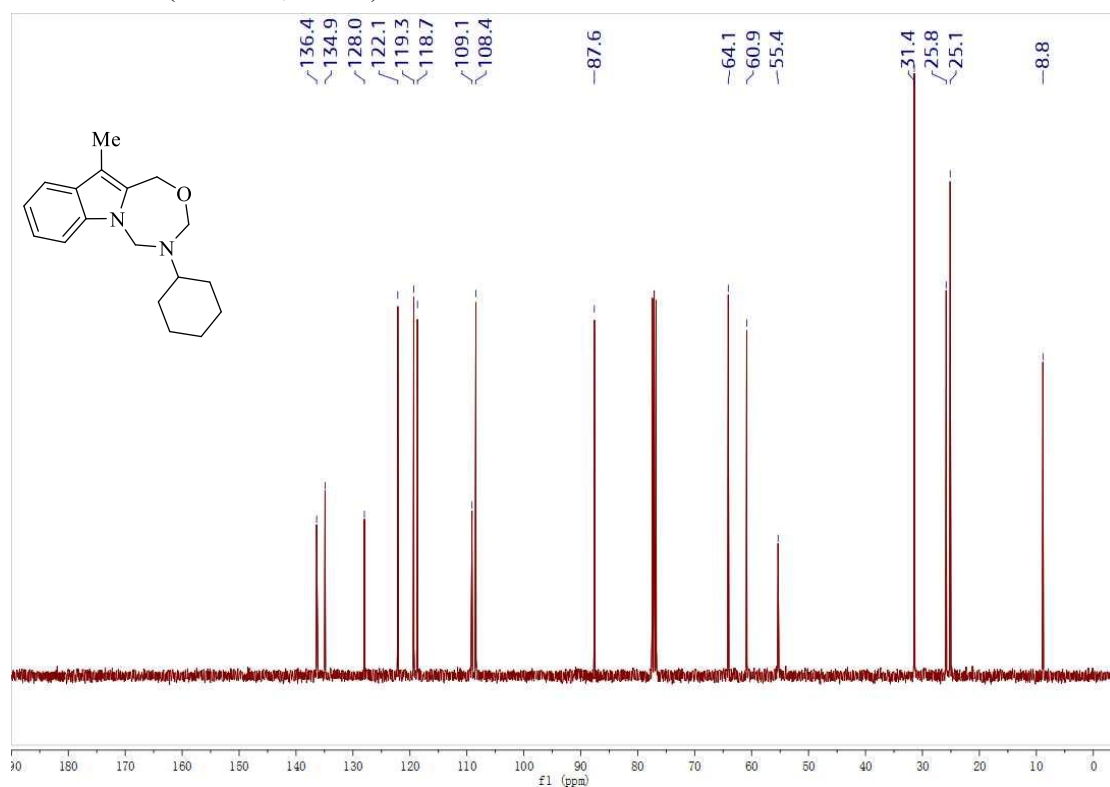

**3p**  $^1\text{H}$  NMR (400 MHz,  $\text{CDCl}_3$ )

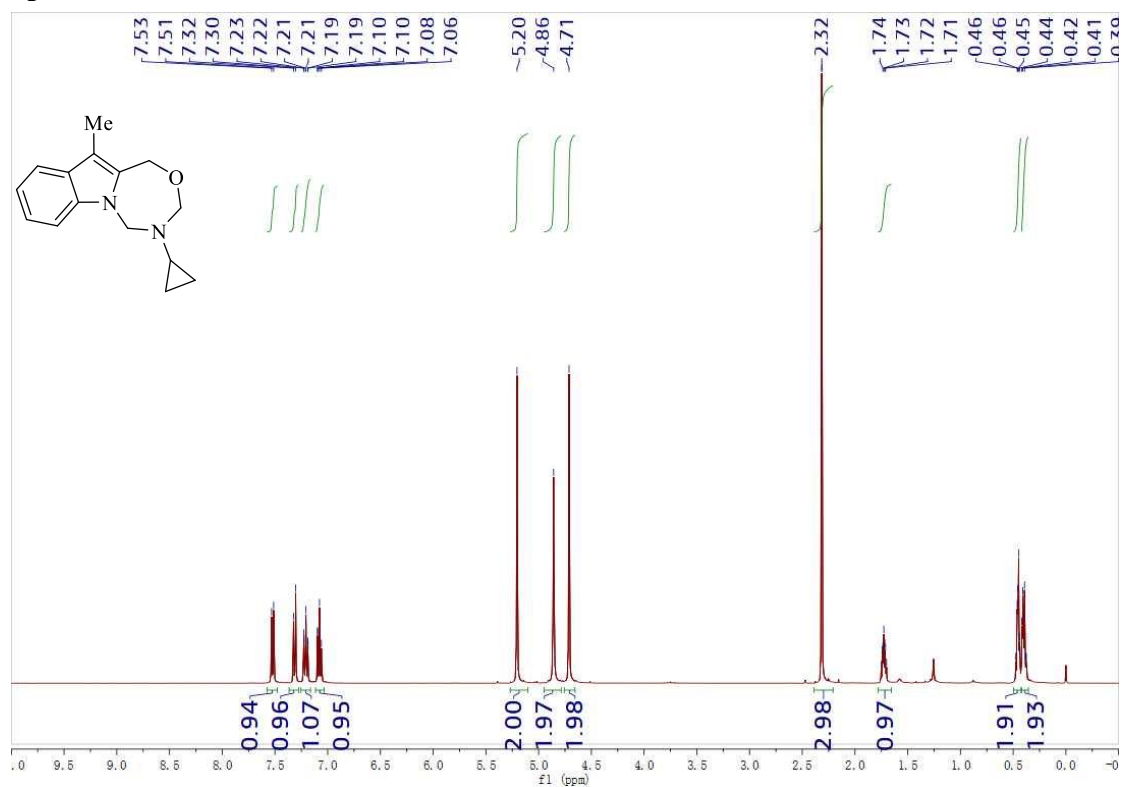

**3p**  $^{13}\text{C}$  NMR (100 MHz,  $\text{CDCl}_3$ )

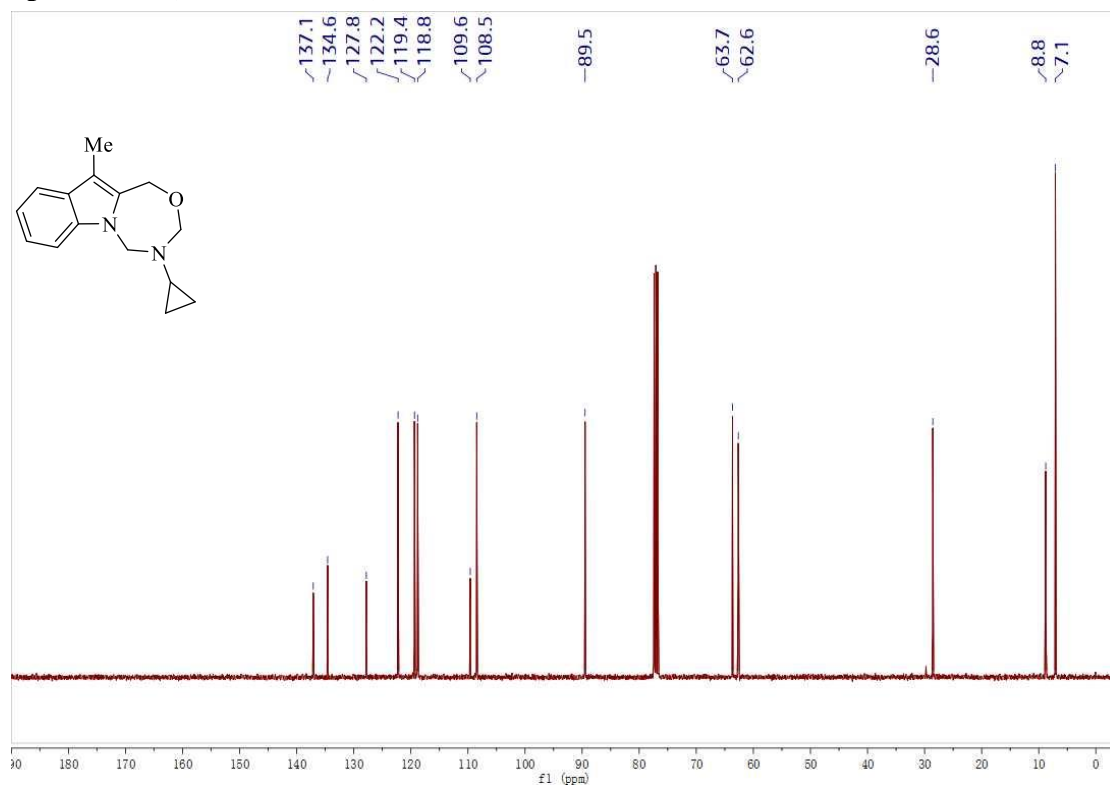



**3q**  $^1\text{H}$  NMR (400 MHz,  $\text{CDCl}_3$ )

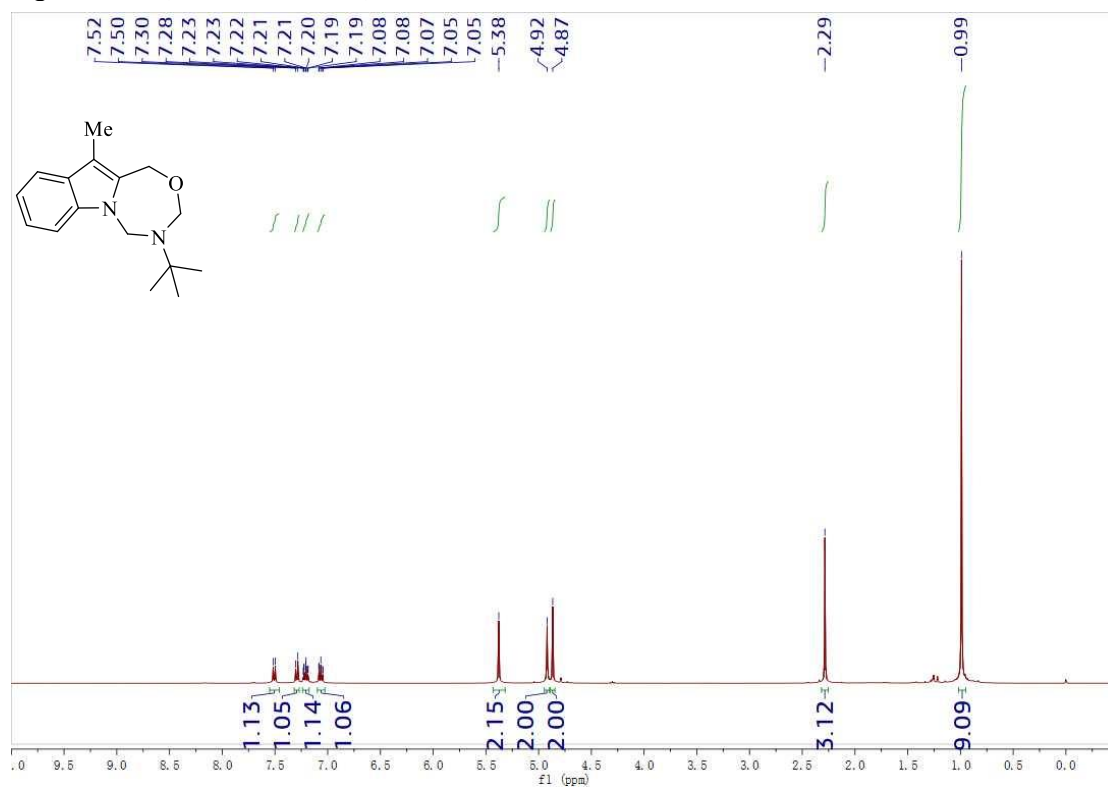

**3q**  $^{13}\text{C}$  NMR (100 MHz,  $\text{CDCl}_3$ )

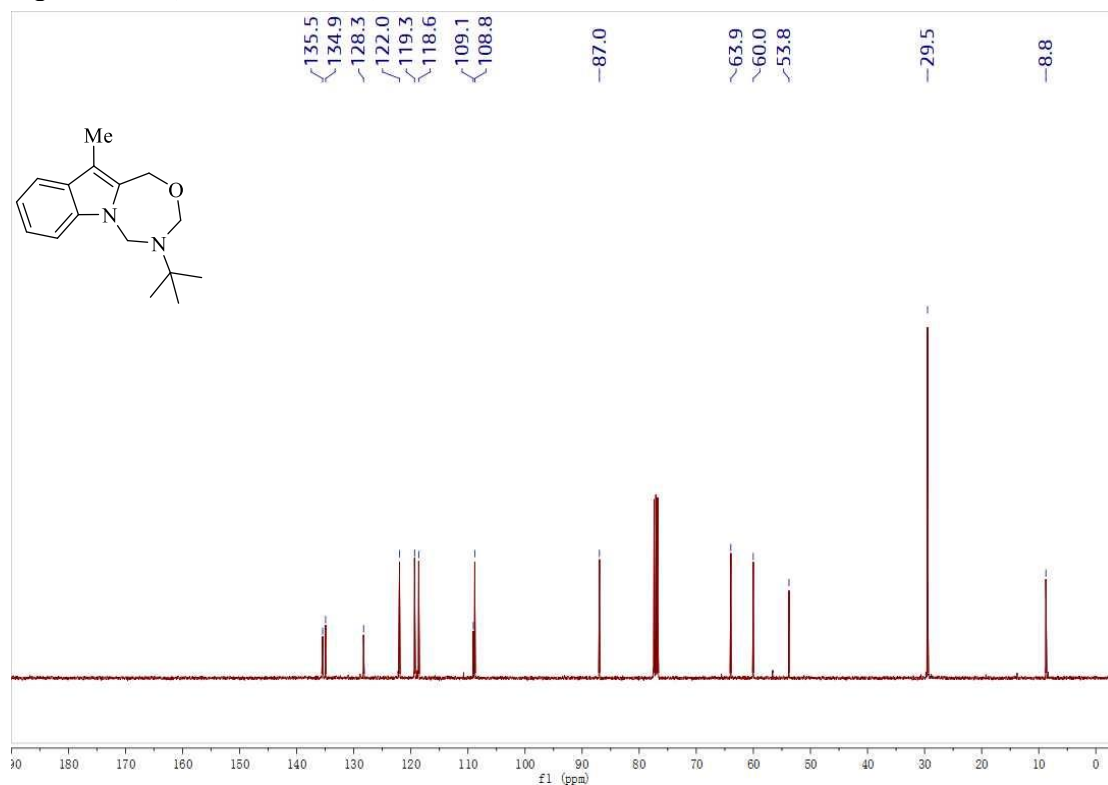

**3r** <sup>1</sup>H NMR (400 MHz, CDCl<sub>3</sub>)

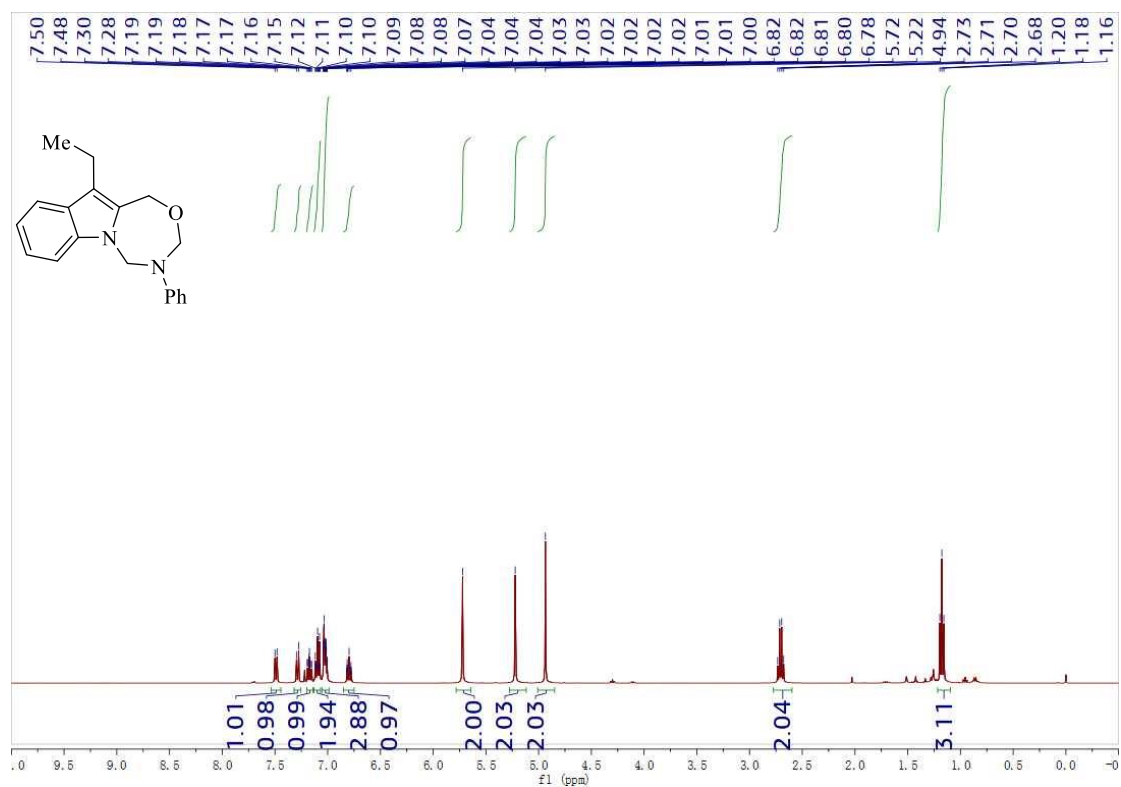

**3r** <sup>13</sup>C NMR (100 MHz, CDCl<sub>3</sub>)

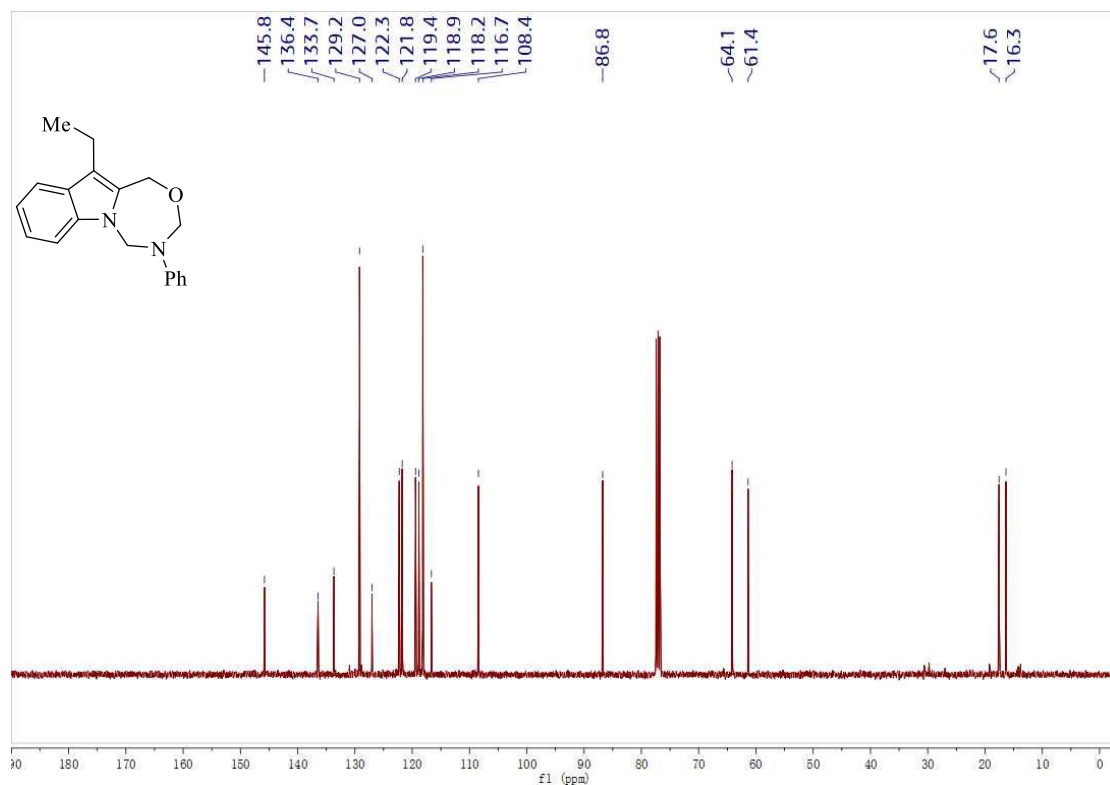

**3s**  $^1\text{H}$  NMR (400 MHz,  $\text{CDCl}_3$ )

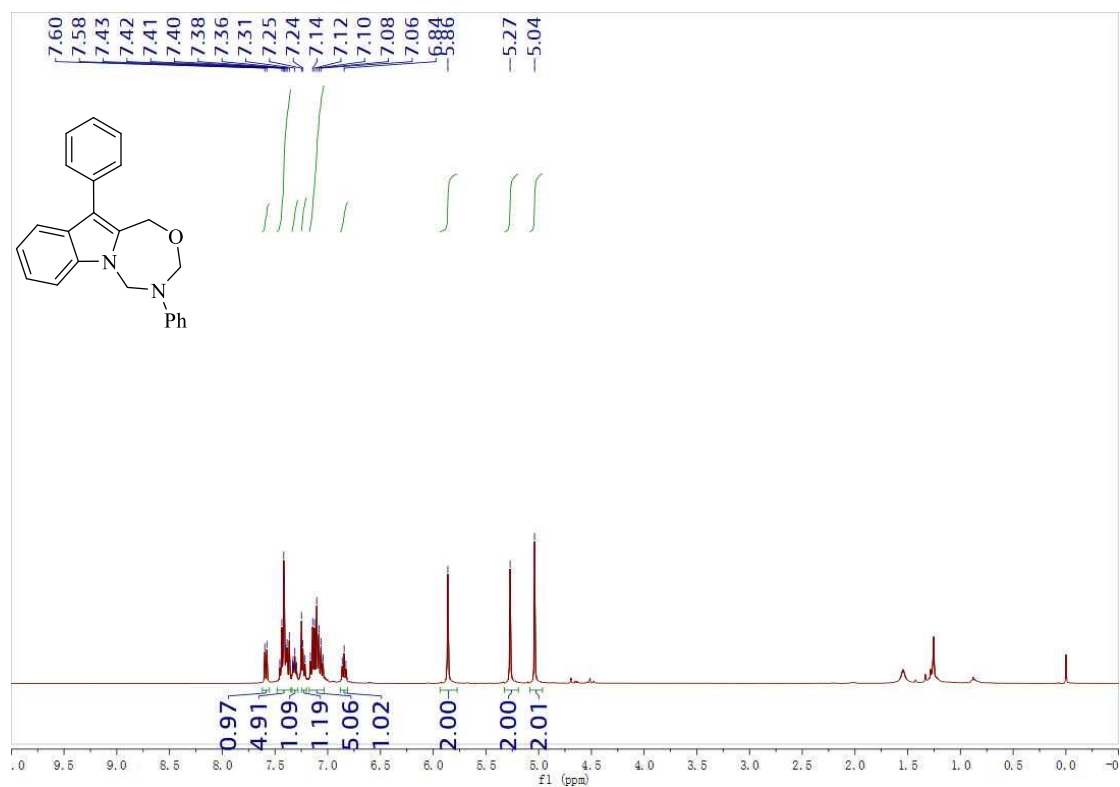

**3s**  $^{13}\text{C}$  NMR (100 MHz,  $\text{CDCl}_3$ )

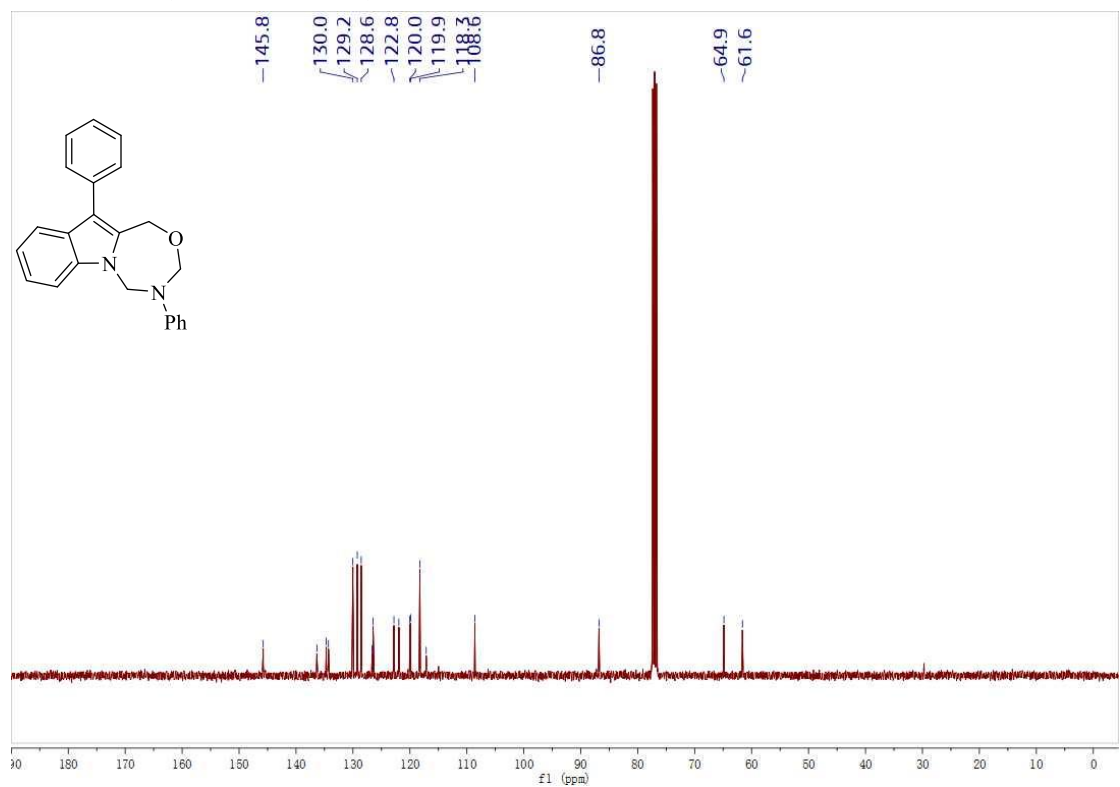

**3t** <sup>1</sup>H NMR (400 MHz, CDCl<sub>3</sub>)

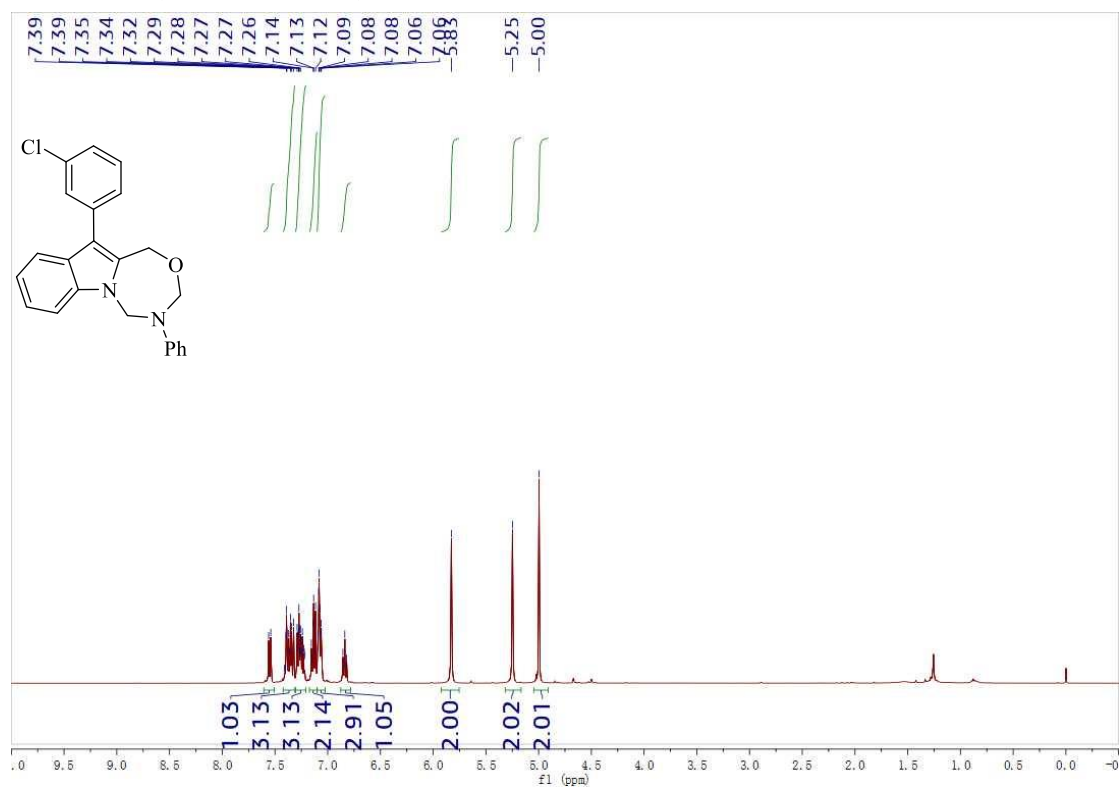

**3t** <sup>13</sup>C NMR (100 MHz, CDCl<sub>3</sub>)

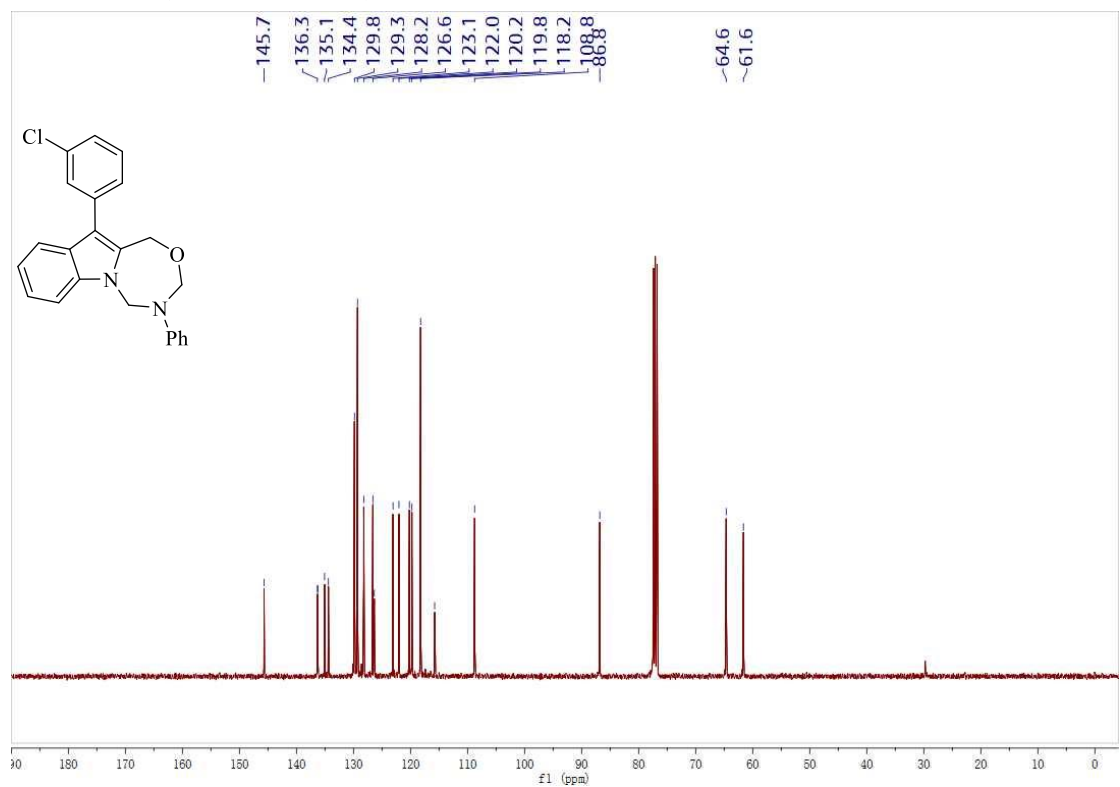

**3u**  $^1\text{H}$  NMR (400 MHz,  $\text{CDCl}_3$ )

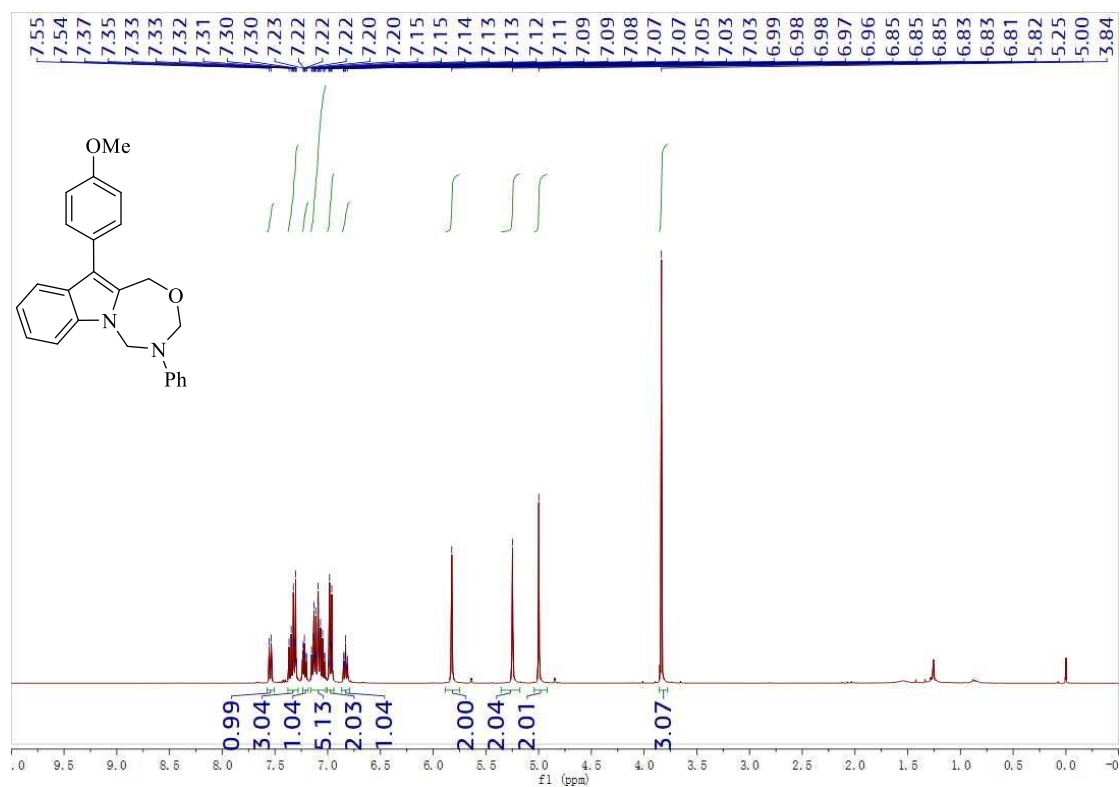

**3u**  $^{13}\text{C}$  NMR (100 MHz,  $\text{CDCl}_3$ )

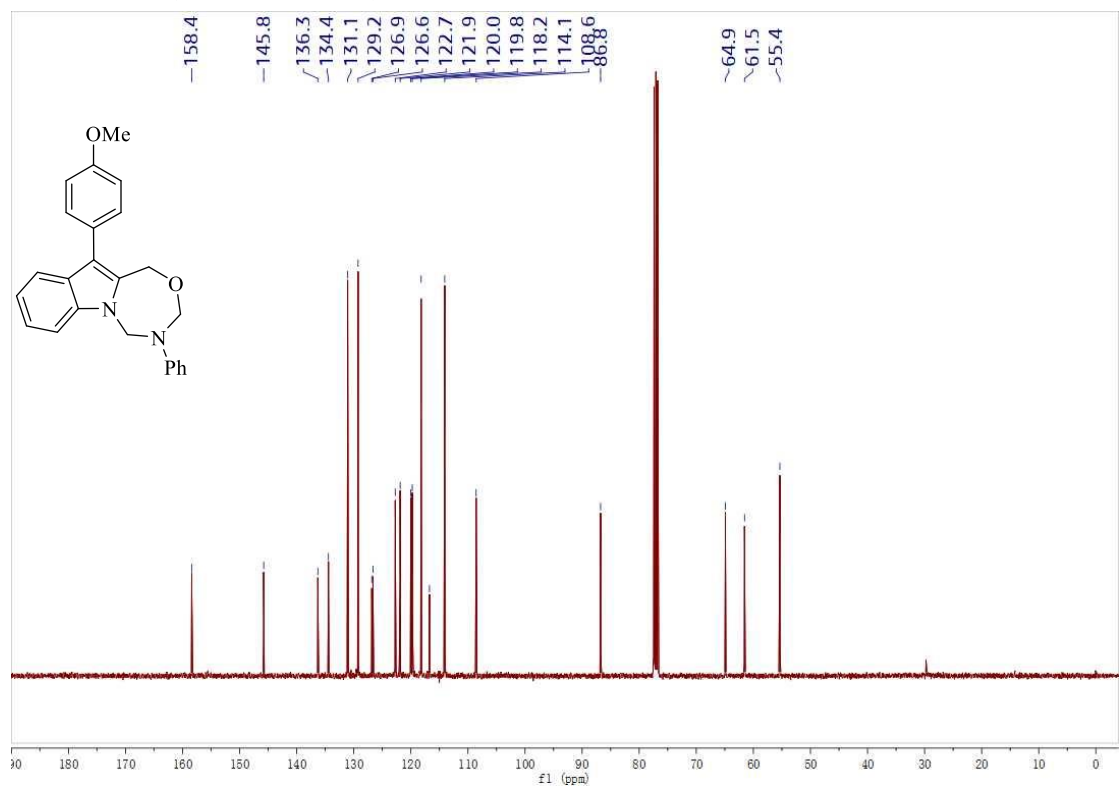

**3v**  $^1\text{H}$  NMR (400 MHz,  $\text{CDCl}_3$ )

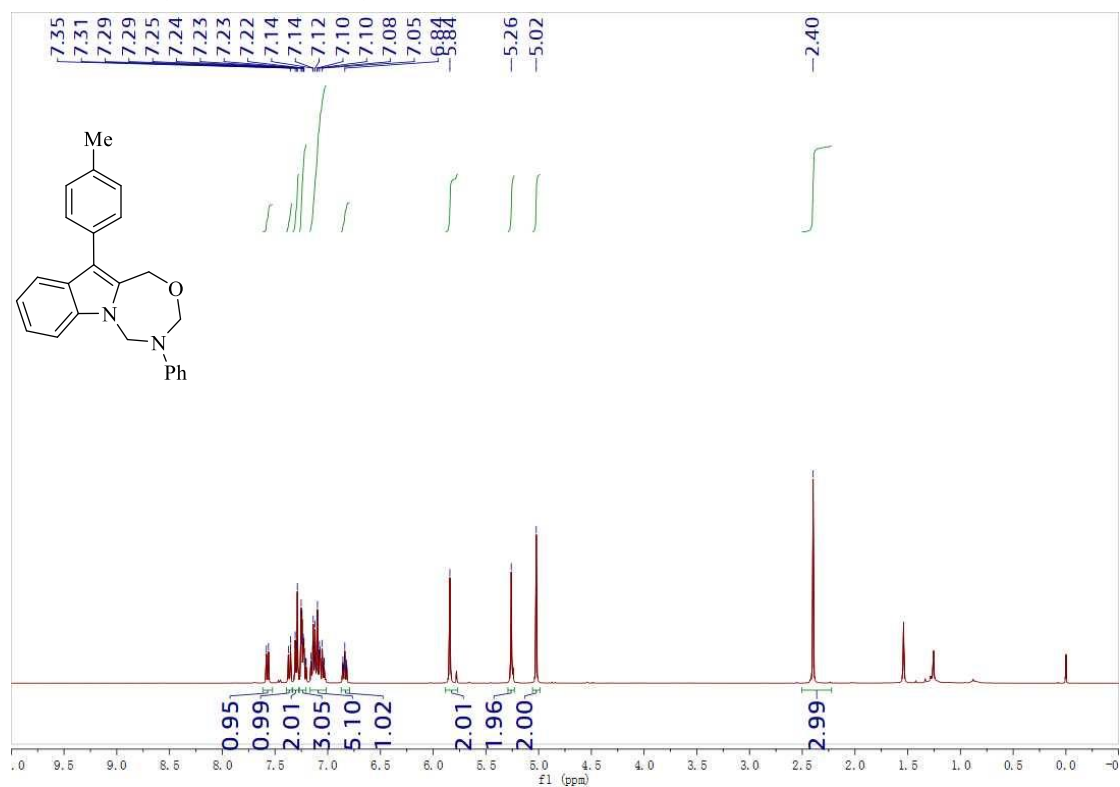

**3v**  $^{13}\text{C}$  NMR (100 MHz,  $\text{CDCl}_3$ )

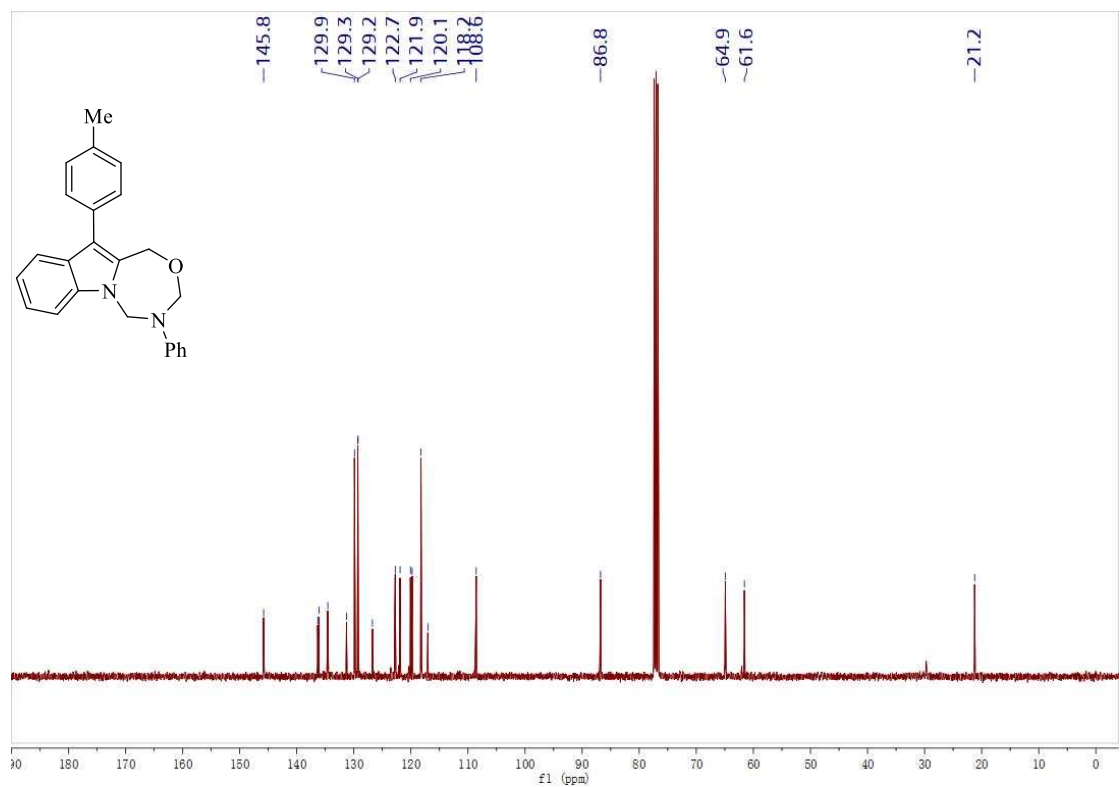

**3w**  $^1\text{H}$  NMR (400 MHz,  $\text{CDCl}_3$ )

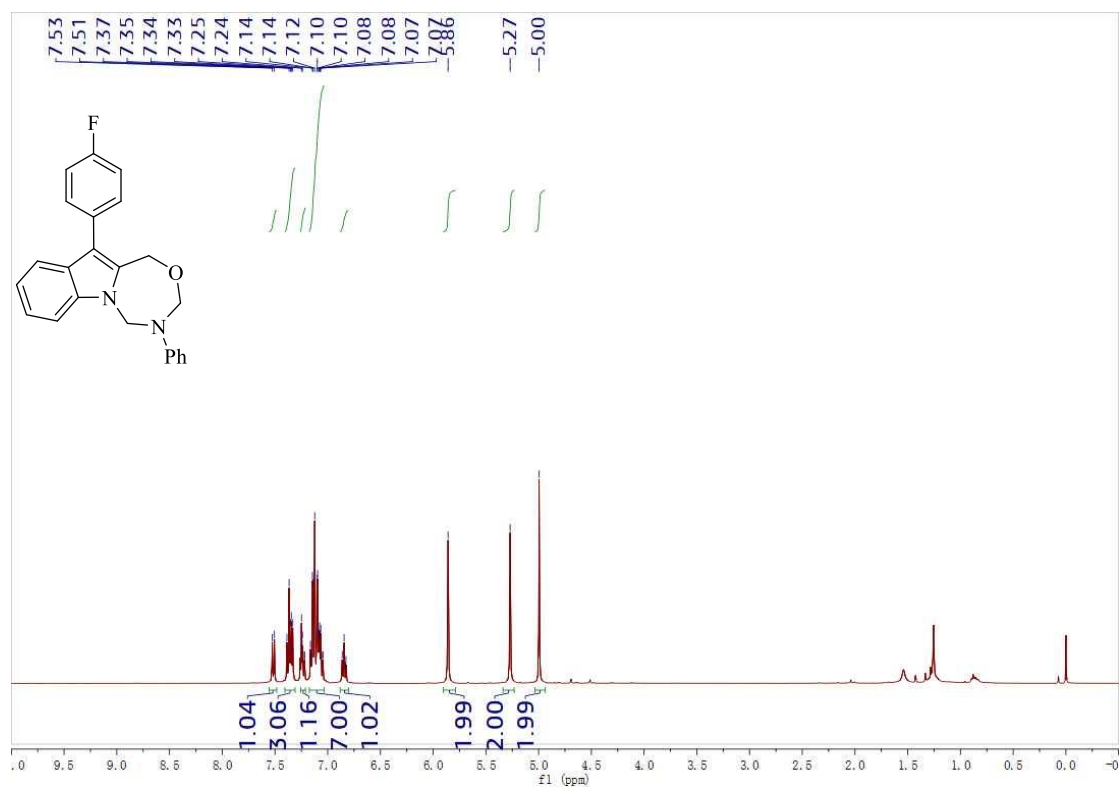

**3w**  $^{13}\text{C}$  NMR (100 MHz,  $\text{CDCl}_3$ )

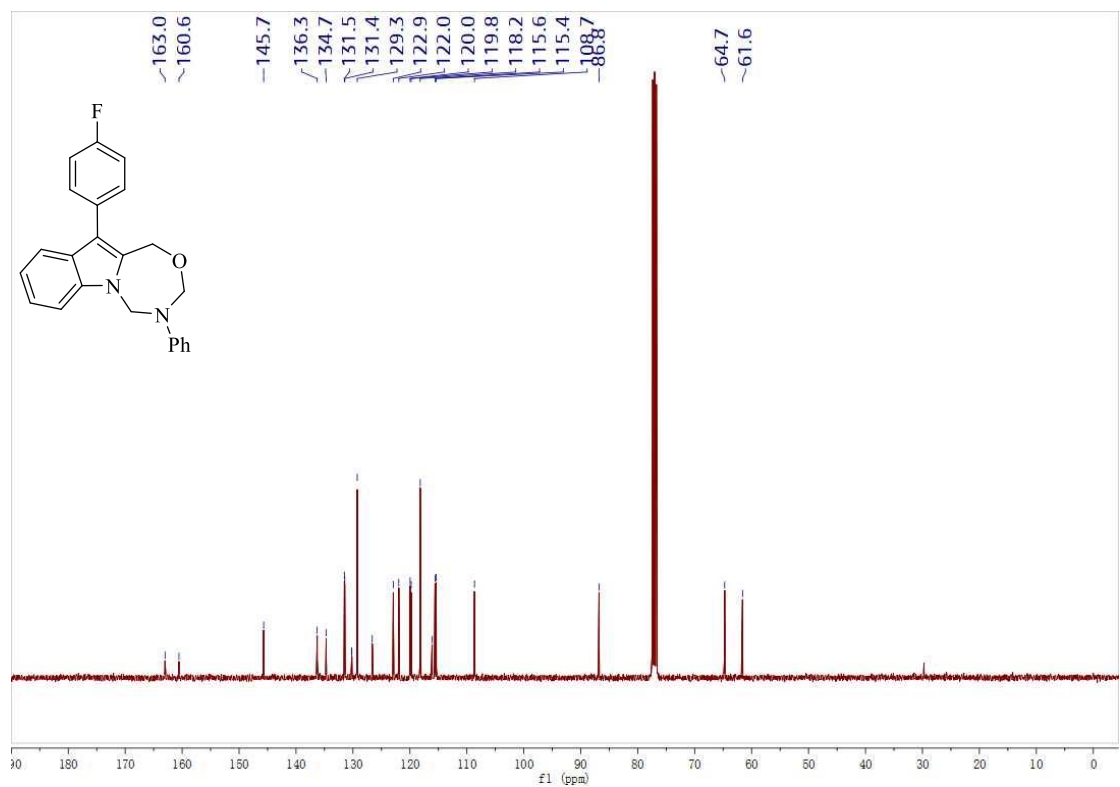

**3w**  $^{19}\text{F}$  NMR (376 MHz,  $\text{CDCl}_3$ )

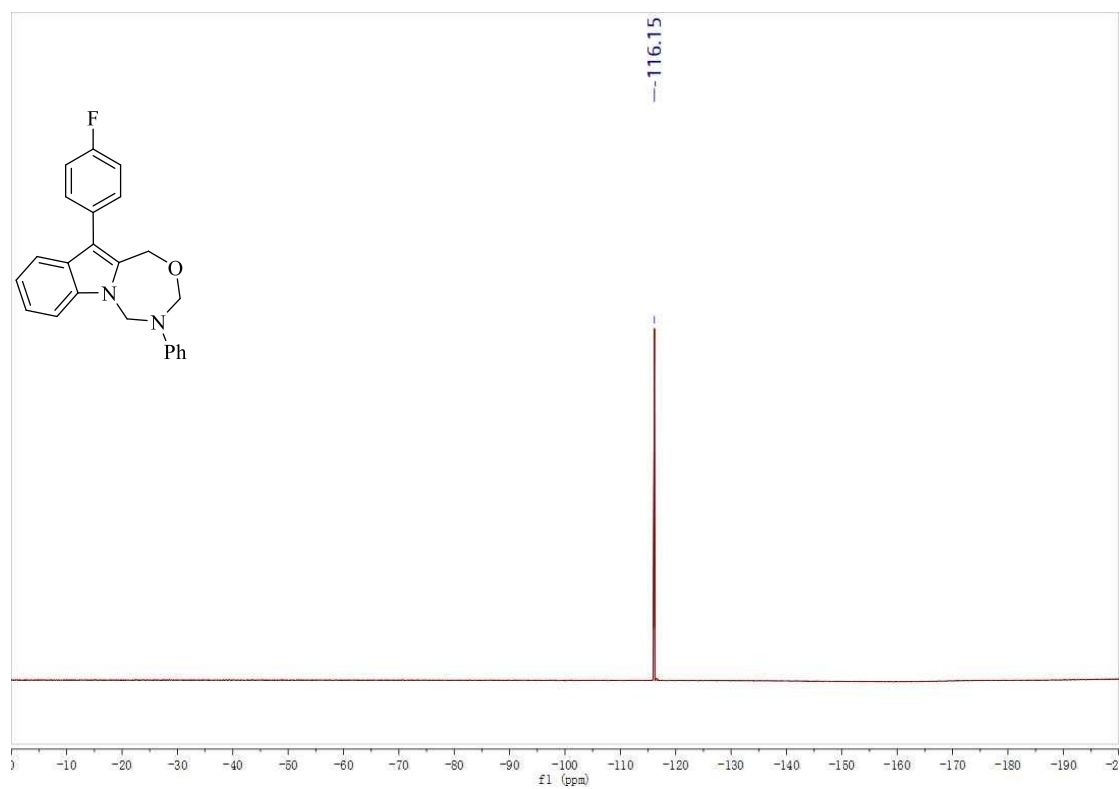



**3x** <sup>1</sup>H NMR (400 MHz, CDCl<sub>3</sub>)

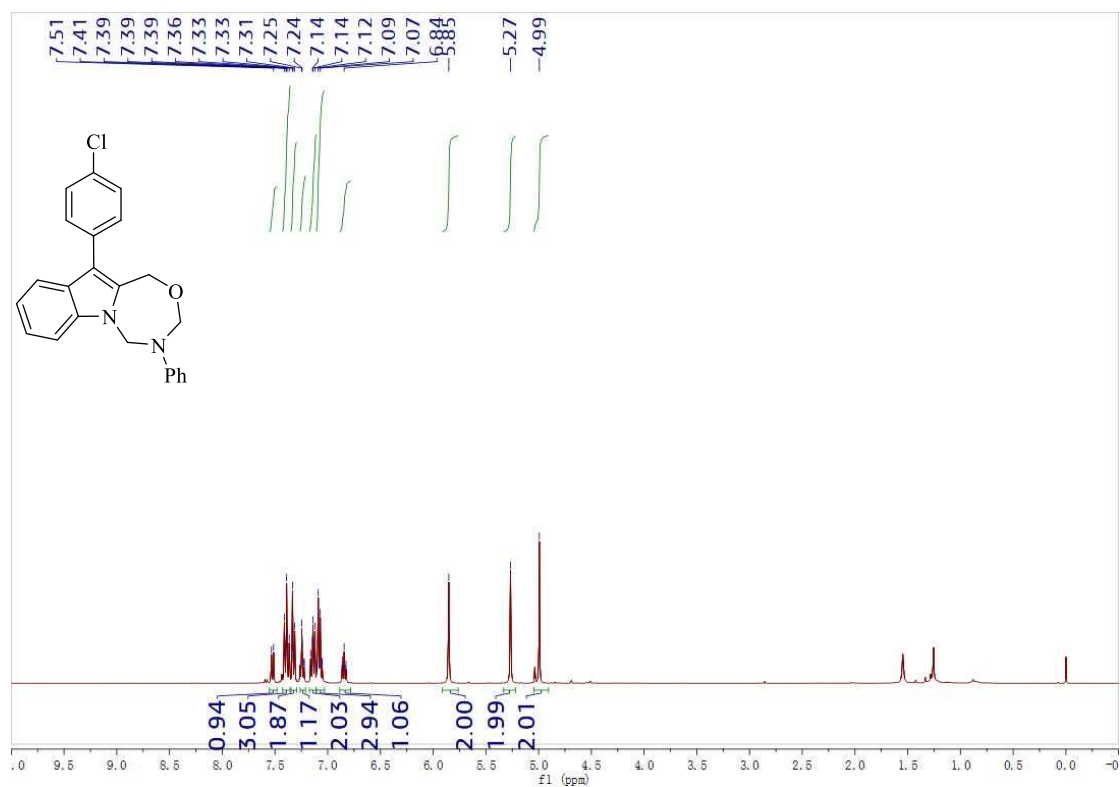

**3x** <sup>13</sup>C NMR (100 MHz, CDCl<sub>3</sub>)

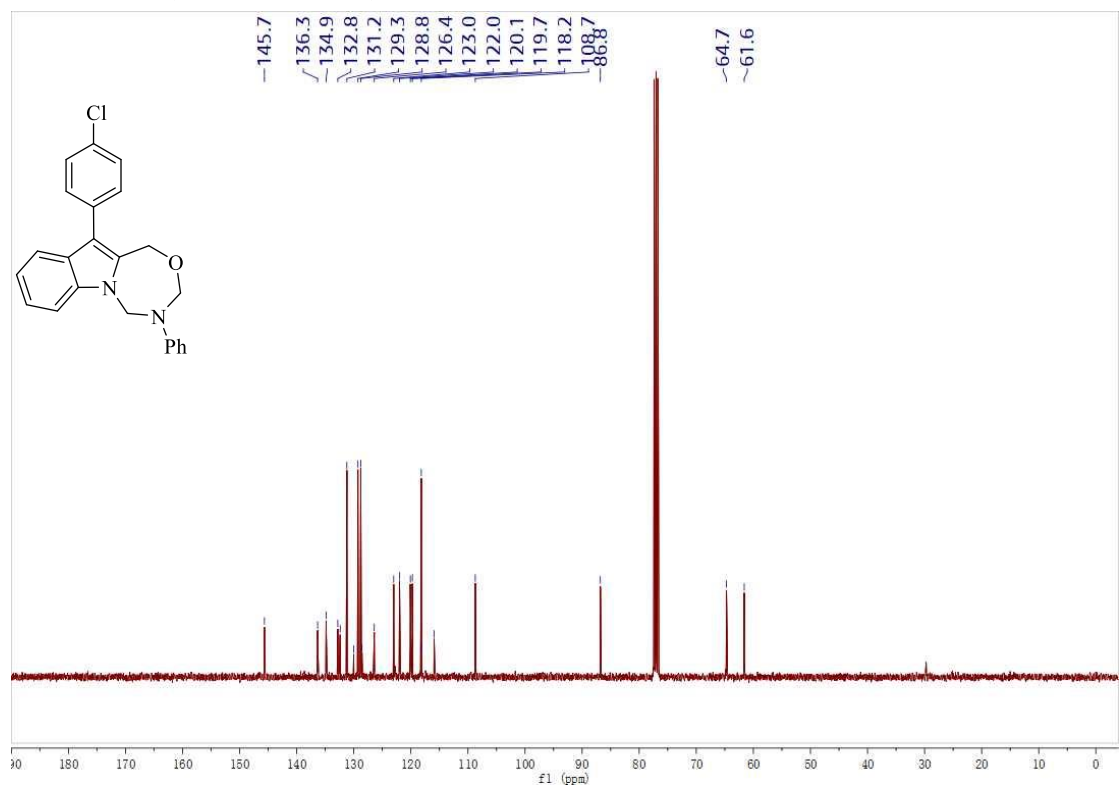

**3y**  $^1\text{H}$  NMR (400 MHz,  $\text{CDCl}_3$ )

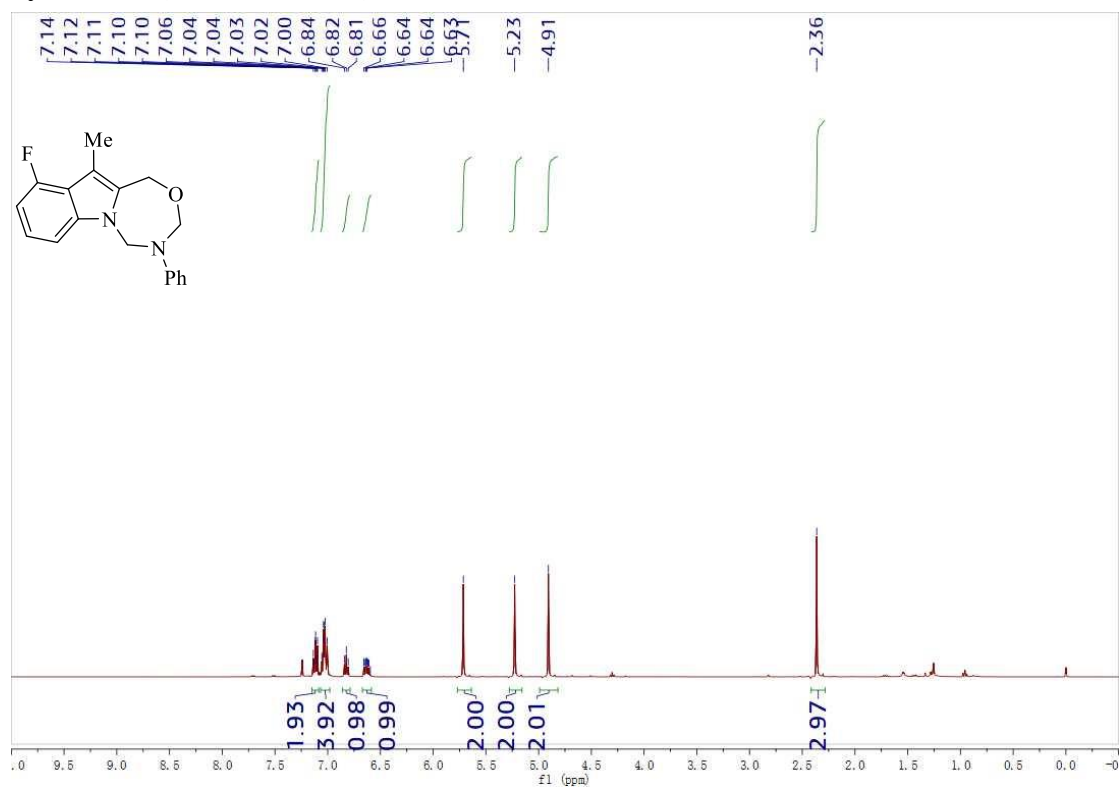

**3y**  $^{13}\text{C}$  NMR (100 MHz,  $\text{CDCl}_3$ )

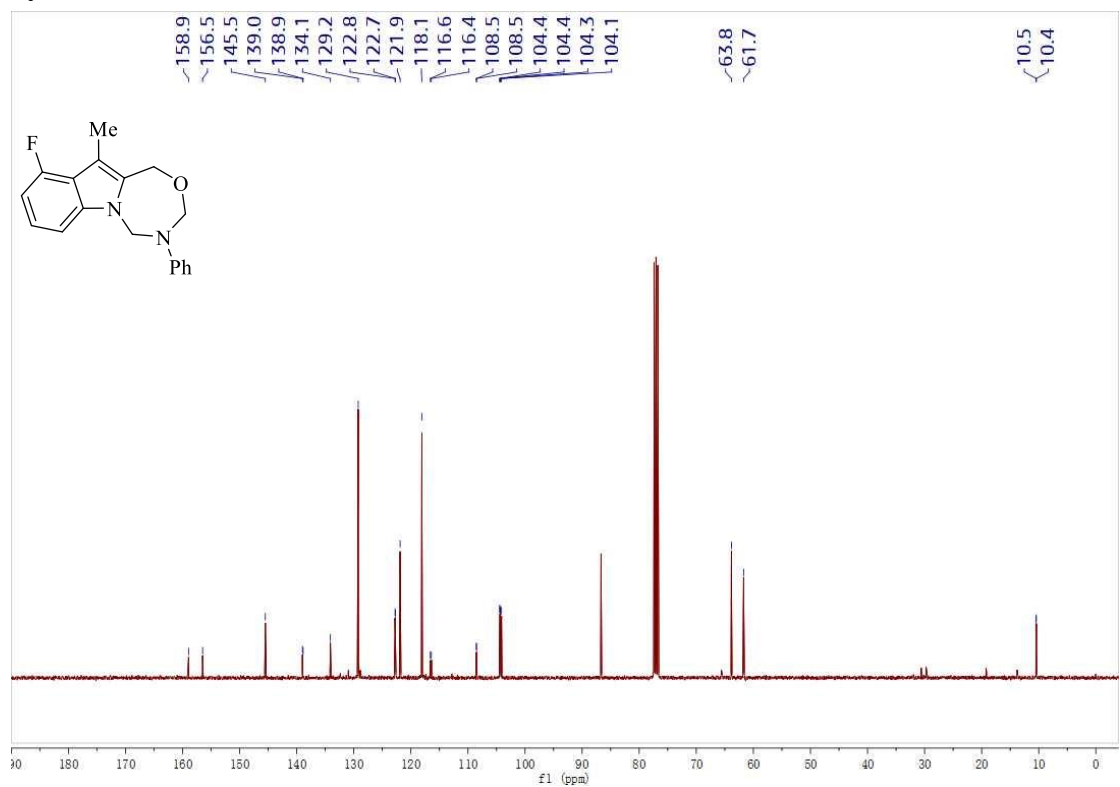

**3y**  $^{19}\text{F}$  NMR (376 MHz,  $\text{CDCl}_3$ )

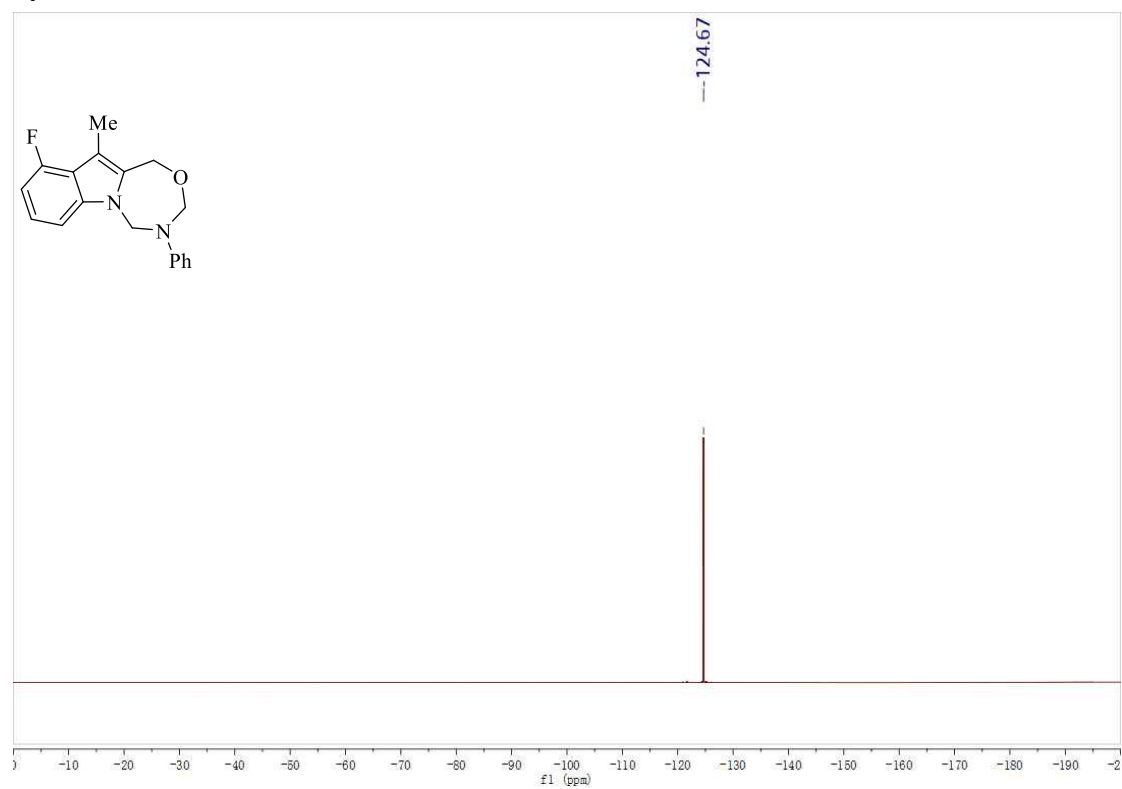

**3z** <sup>1</sup>H NMR (400 MHz, CDCl<sub>3</sub>)

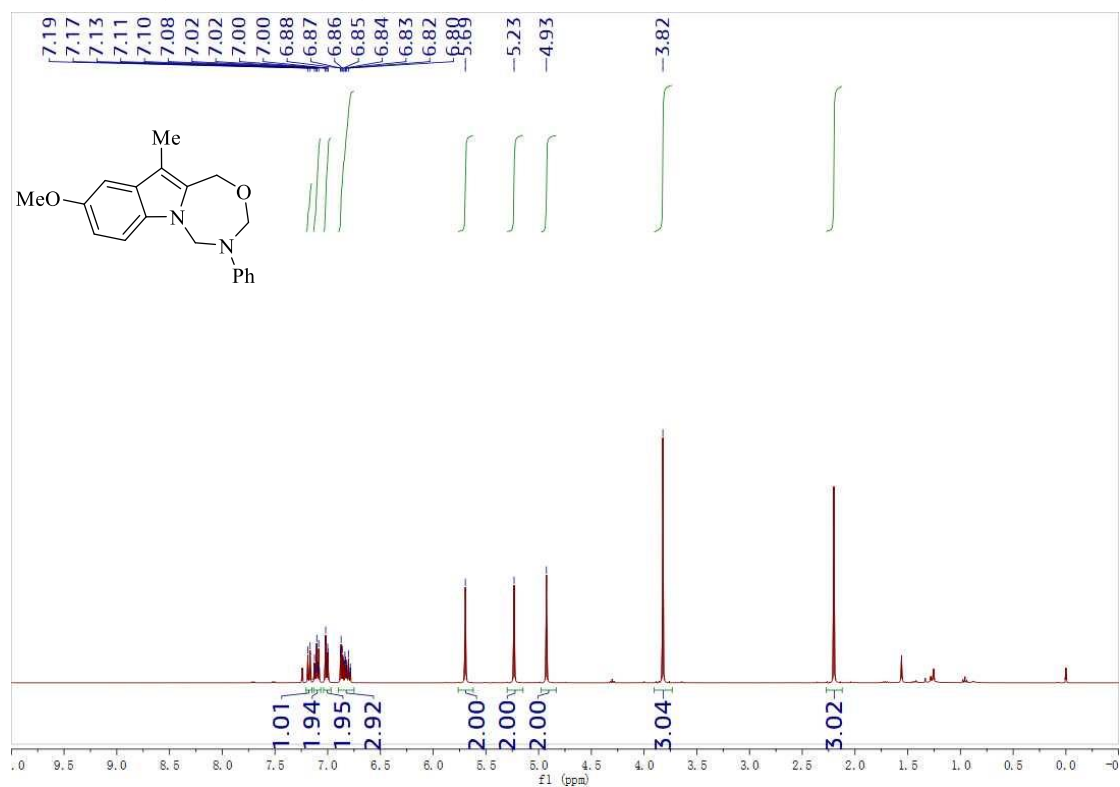

**3z** <sup>13</sup>C NMR (100 MHz, CDCl<sub>3</sub>)

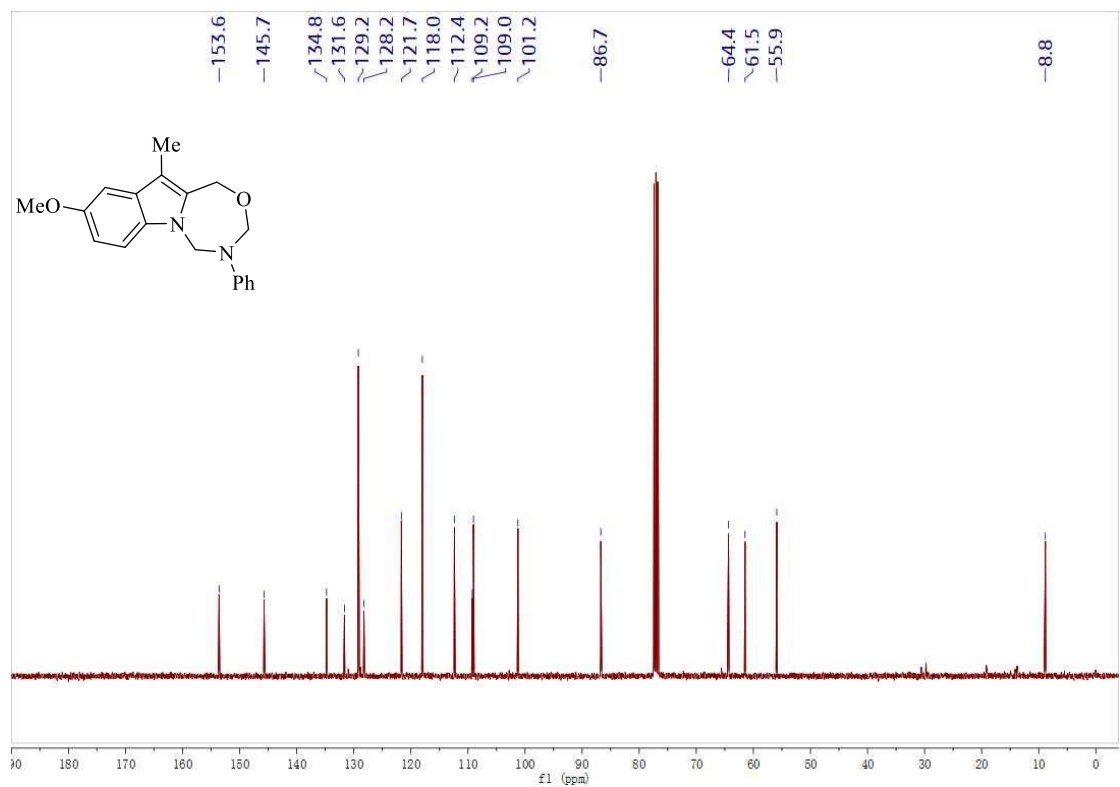

**3a'** <sup>1</sup>H NMR (400 MHz, CDCl<sub>3</sub>)

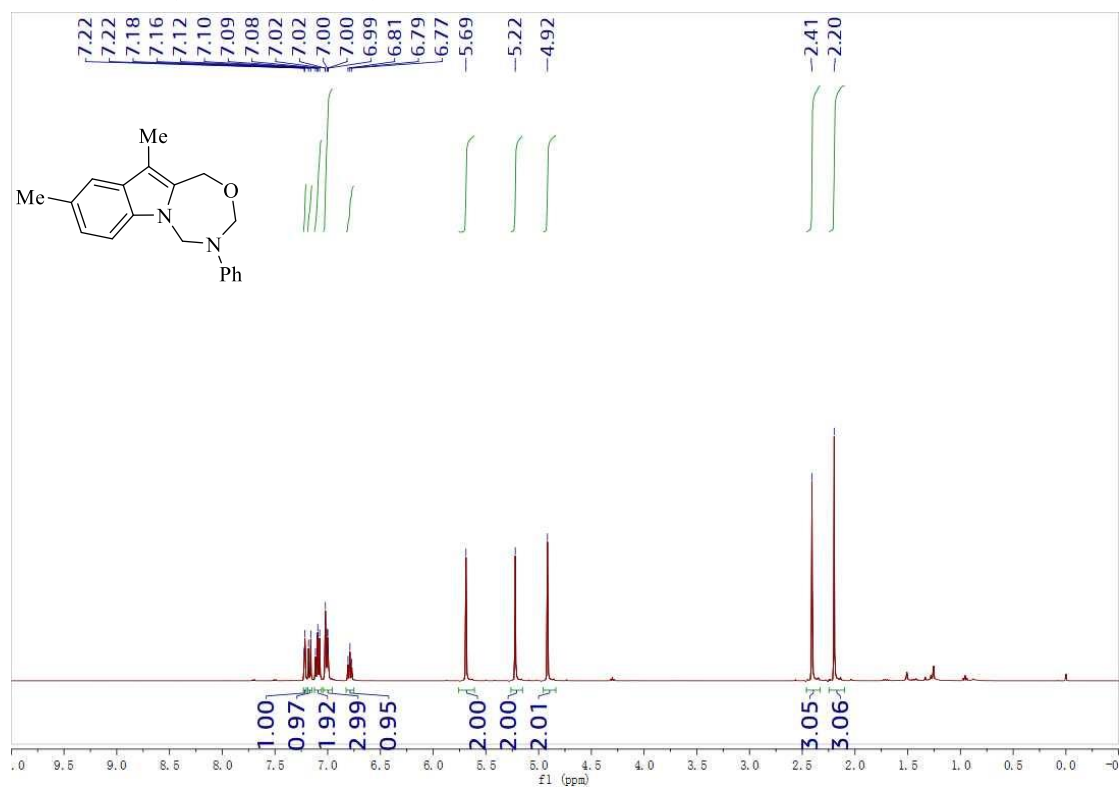

**3a'** <sup>13</sup>C NMR (100 MHz, CDCl<sub>3</sub>)

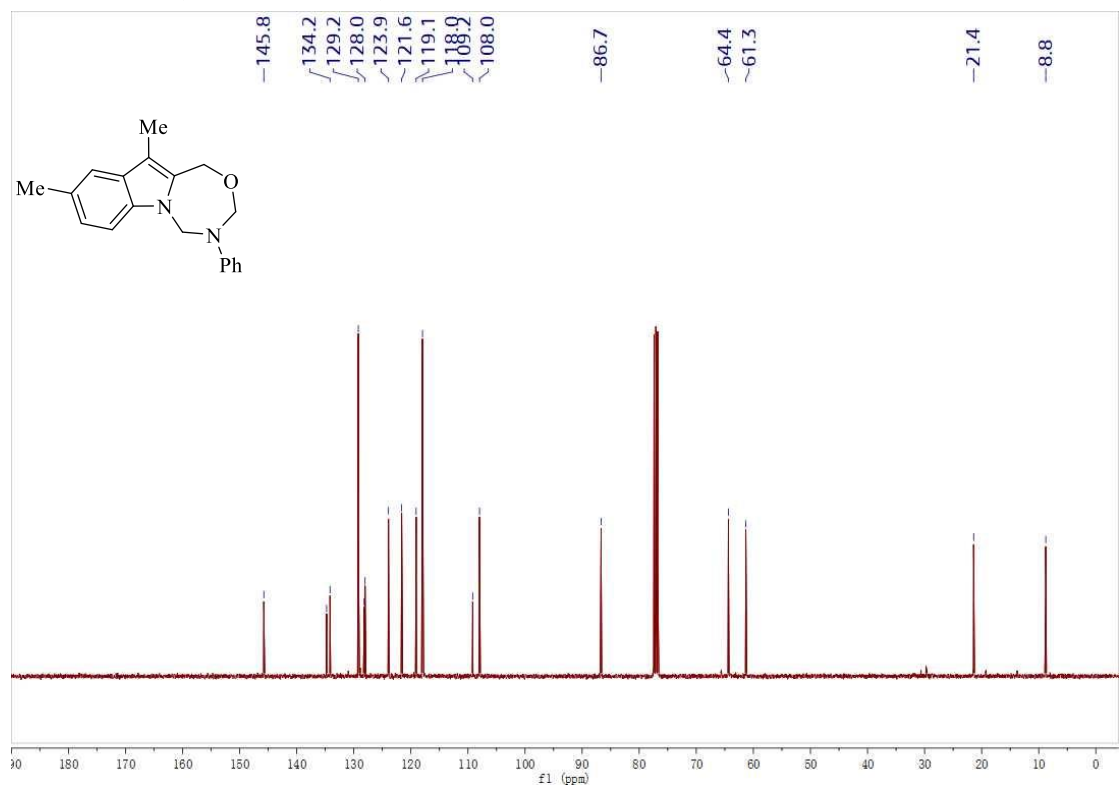

**3b'** <sup>1</sup>H NMR (400 MHz, CDCl<sub>3</sub>)

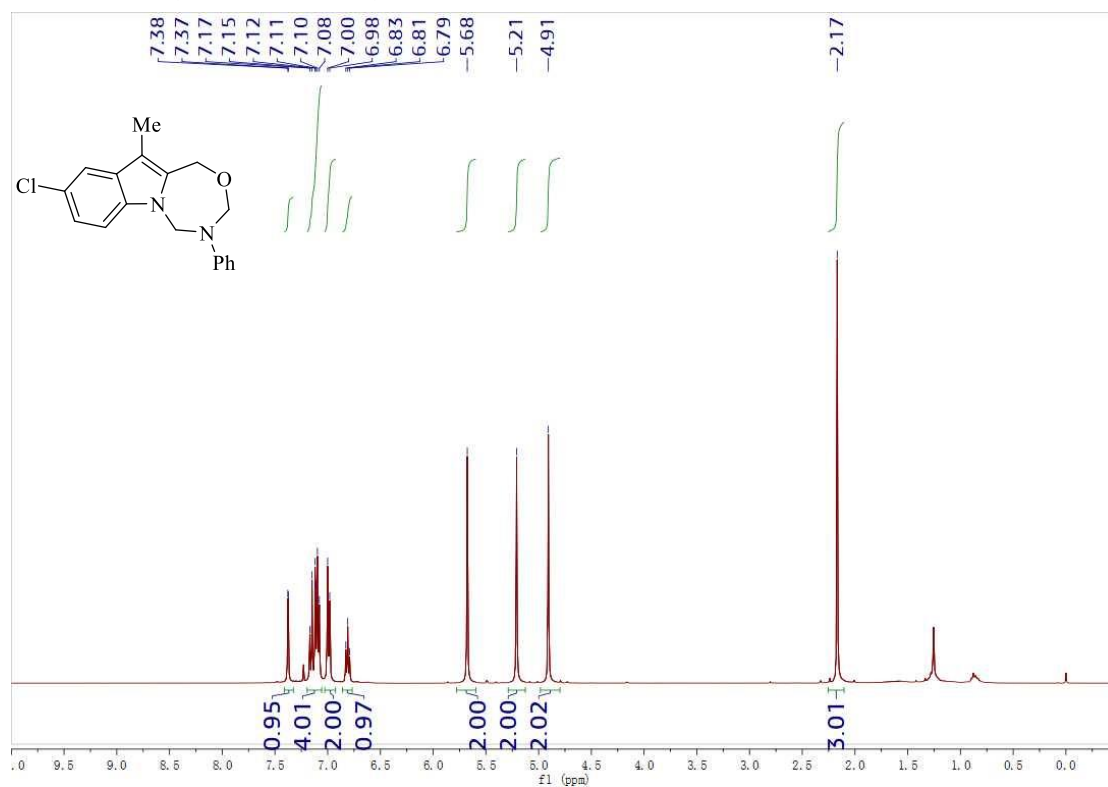

**3b'** <sup>13</sup>C NMR (100 MHz, CDCl<sub>3</sub>)

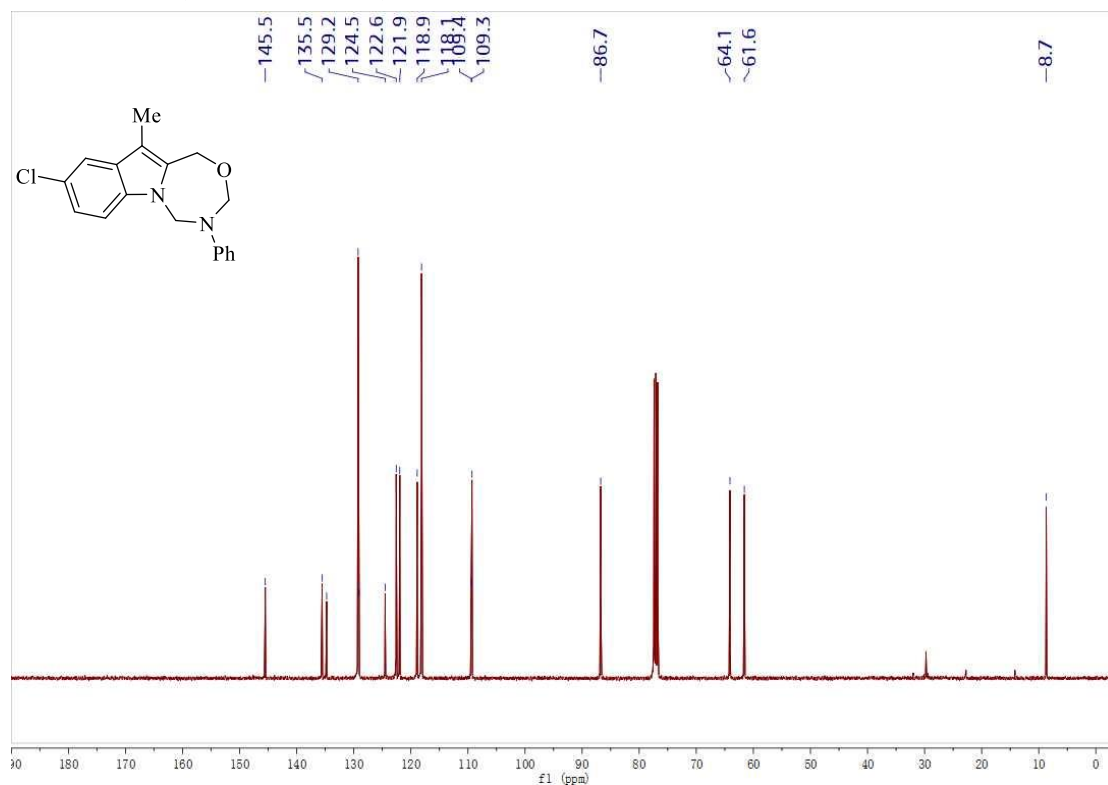

**3c'**  $^1\text{H}$  NMR (400 MHz,  $\text{CDCl}_3$ )

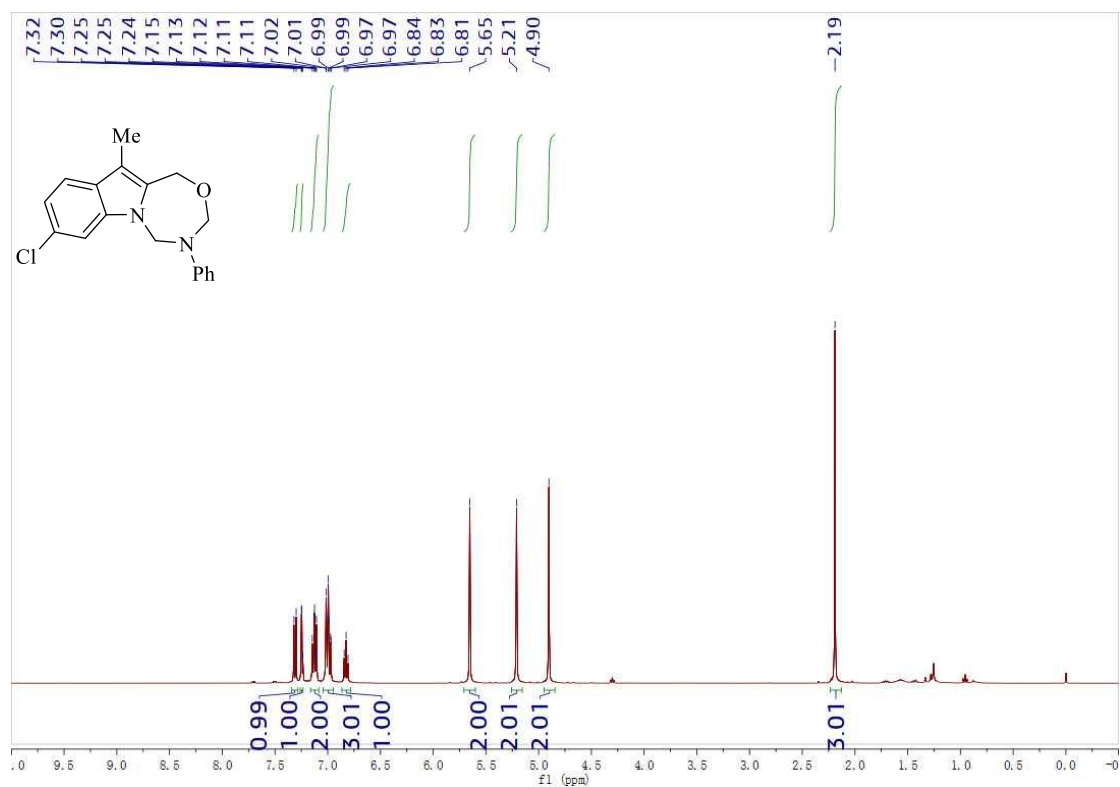

**3c'**  $^{13}\text{C}$  NMR (100 MHz,  $\text{CDCl}_3$ )

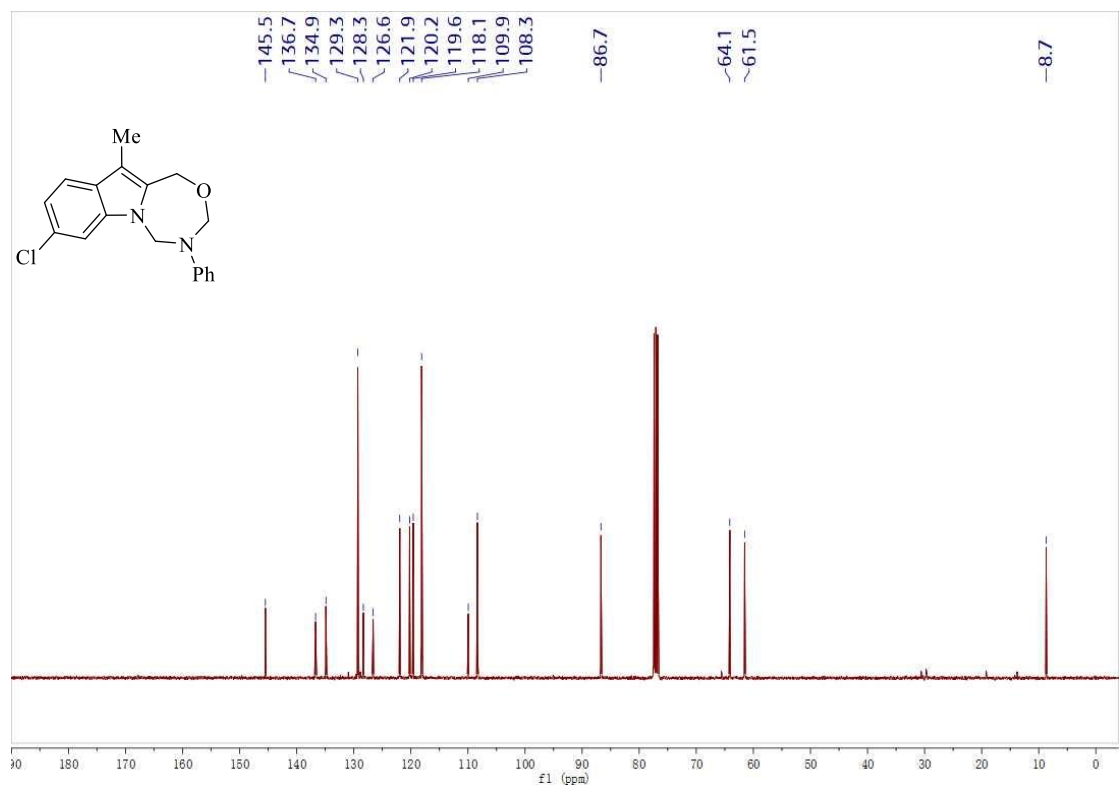

**3d'** <sup>1</sup>H NMR (400 MHz, CDCl<sub>3</sub>)

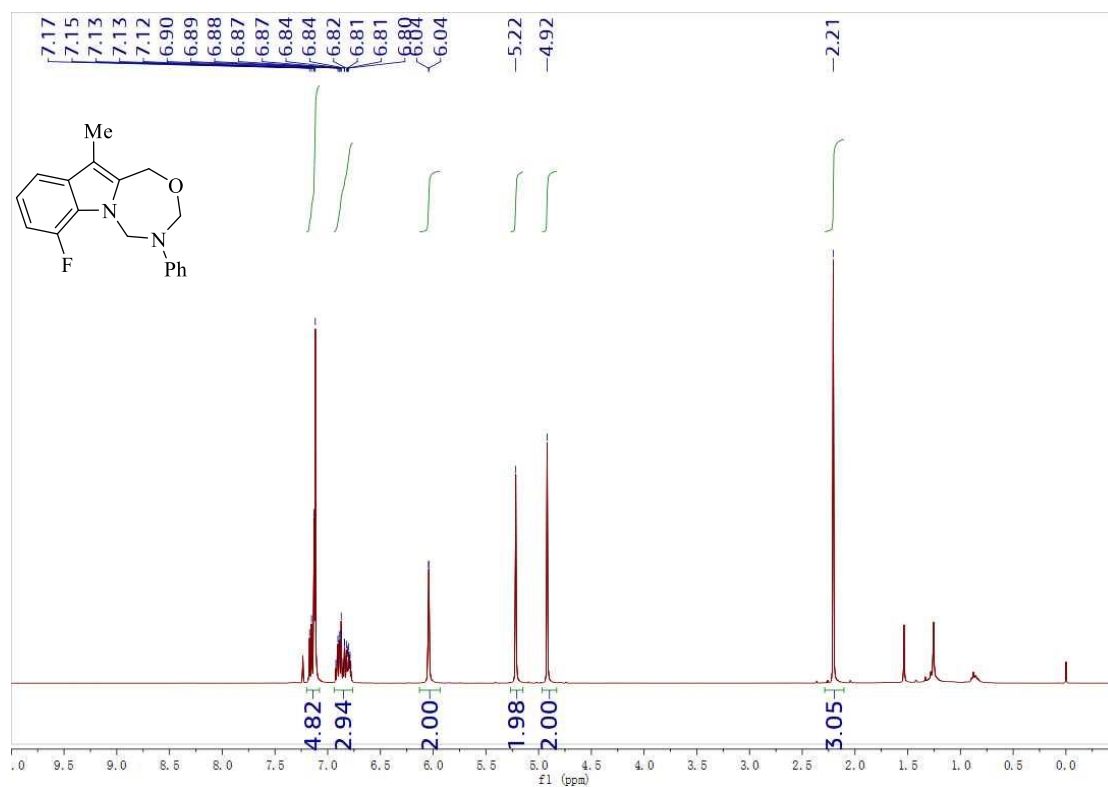

**3d'** <sup>13</sup>C NMR (100 MHz, CDCl<sub>3</sub>)

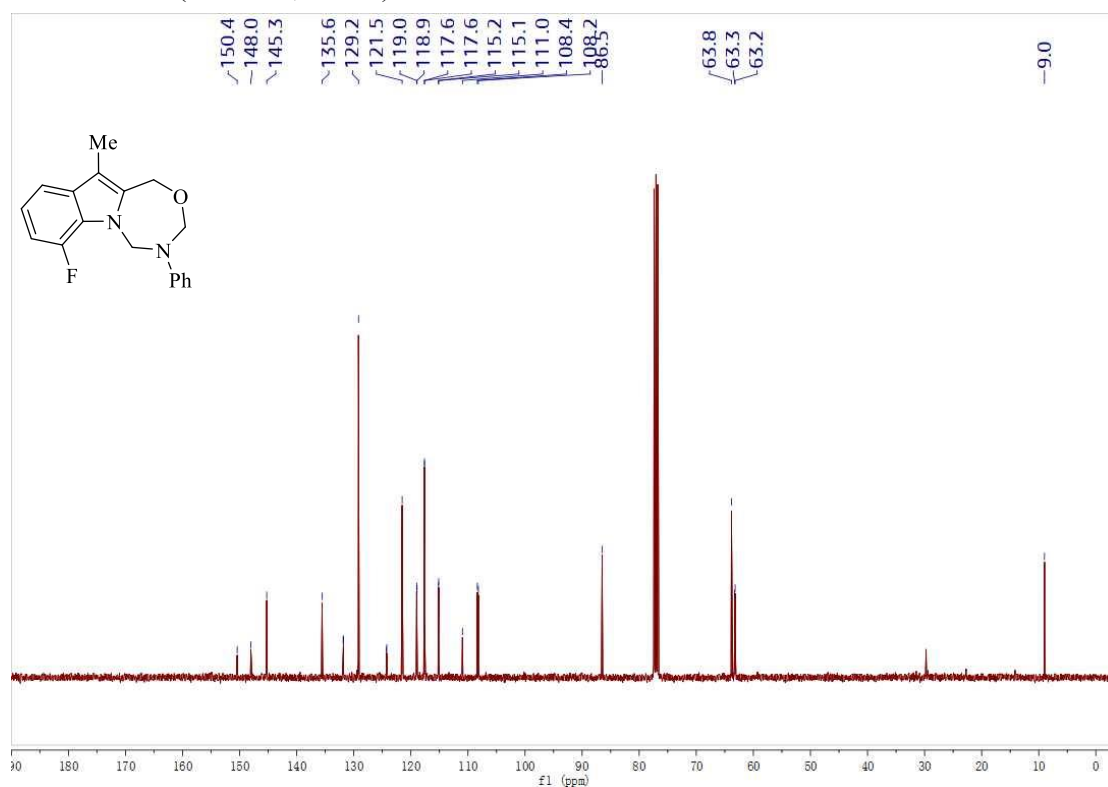



**3d'**  $^{19}\text{F}$  NMR (376 MHz,  $\text{CDCl}_3$ )

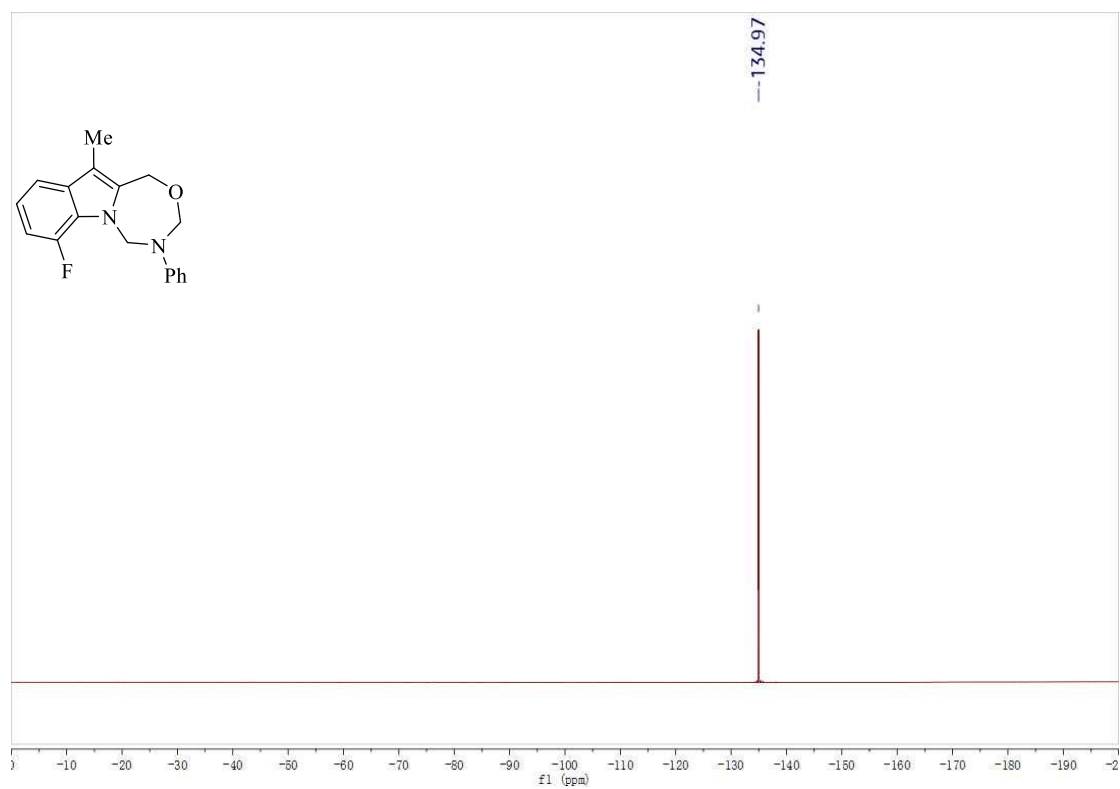

**3e'** <sup>1</sup>H NMR (400 MHz, CDCl<sub>3</sub>)

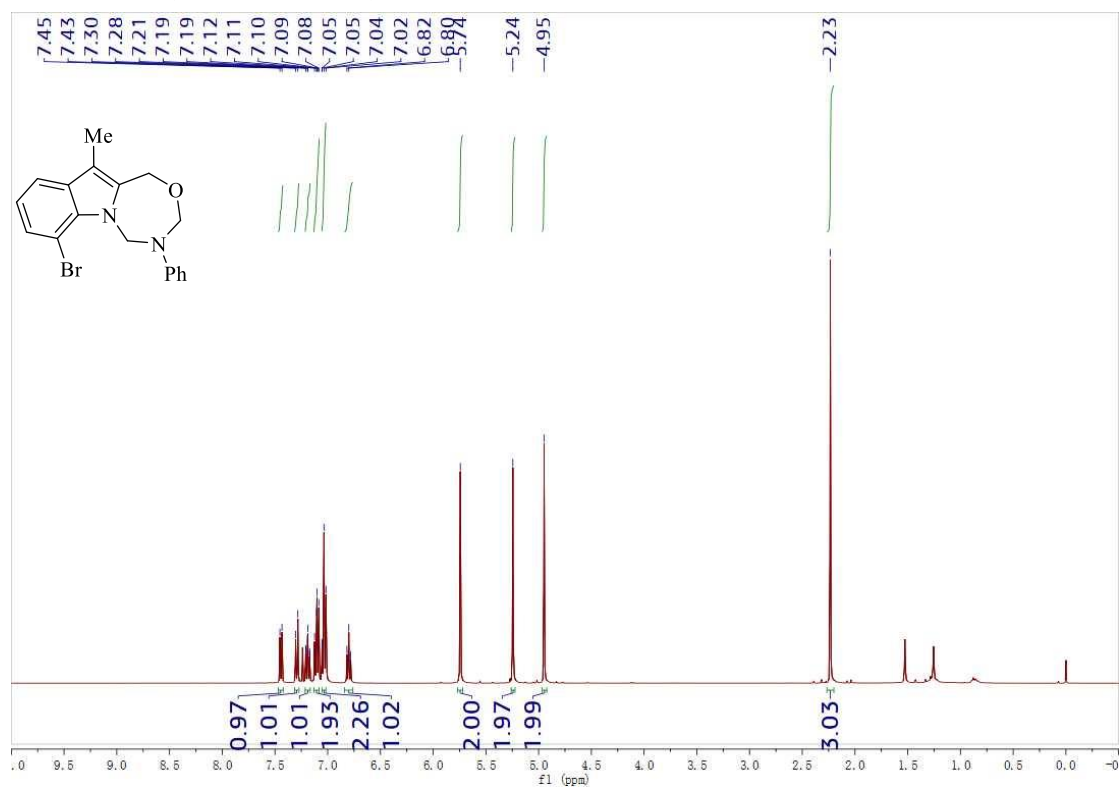

**3e'** <sup>13</sup>C NMR (100 MHz, CDCl<sub>3</sub>)

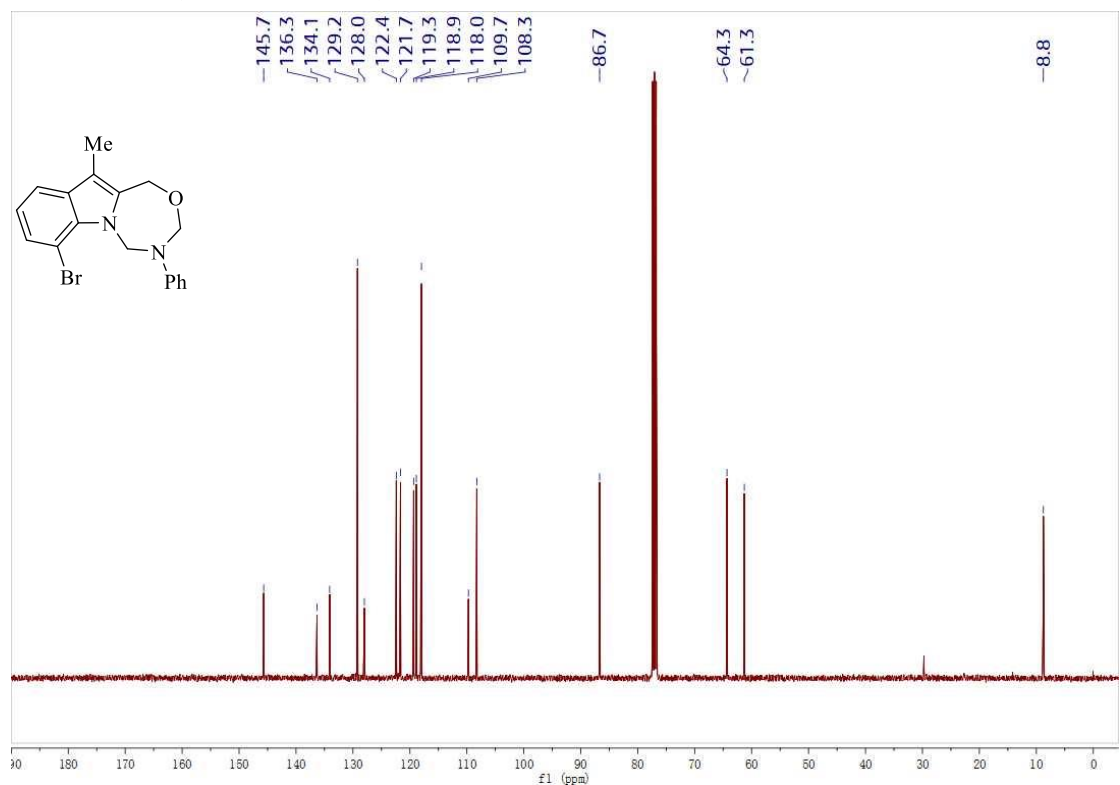

**3k'** <sup>1</sup>H NMR (400 MHz, CDCl<sub>3</sub>)

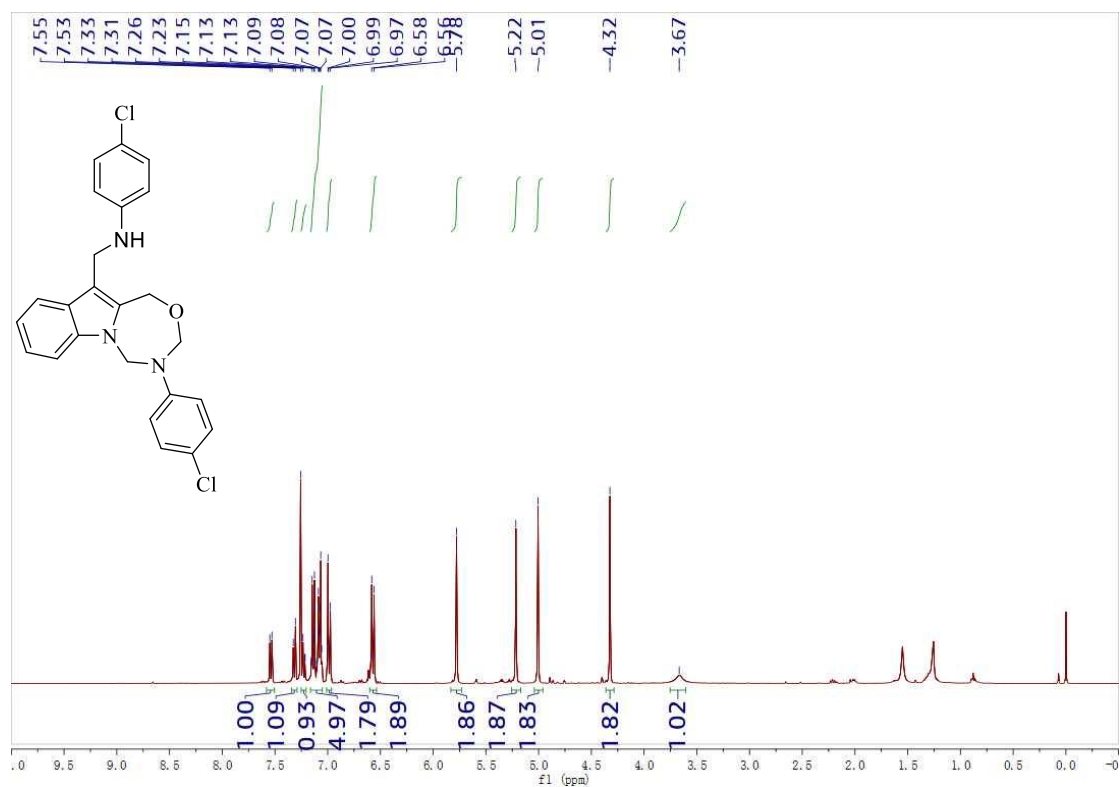

**3k'** <sup>13</sup>C NMR (100 MHz, CDCl<sub>3</sub>)

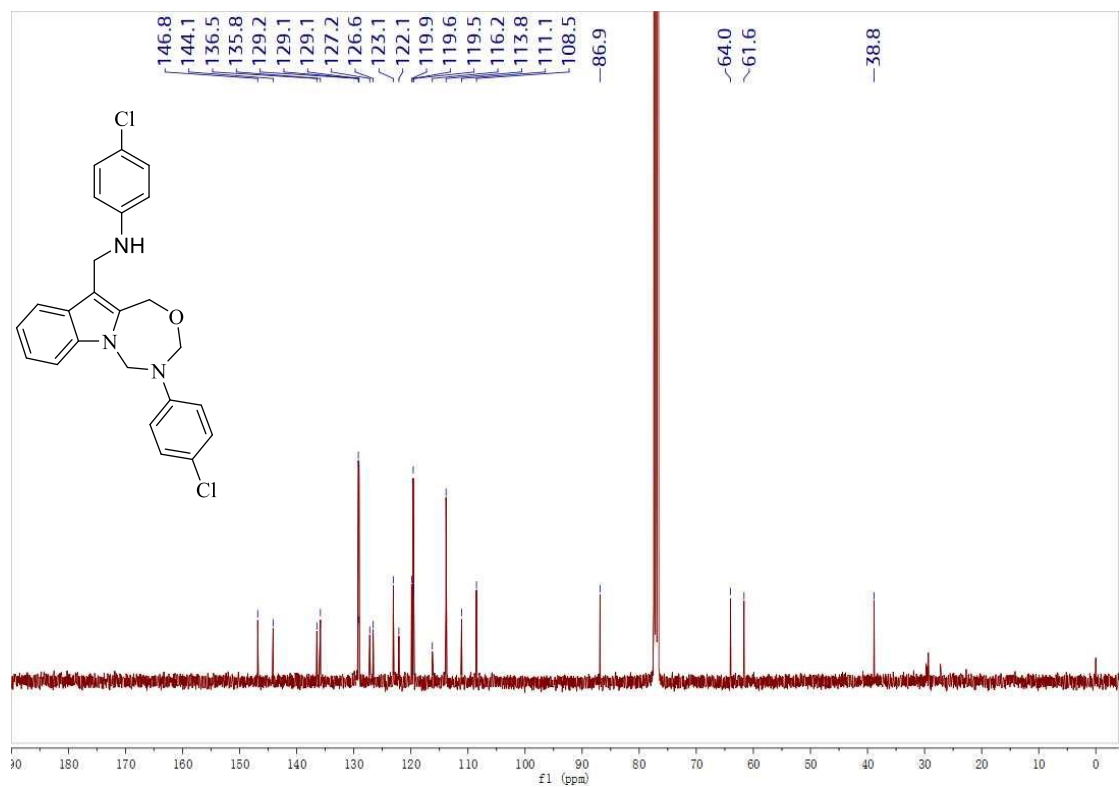

**4b**  $^1\text{H}$  NMR (400 MHz, DMSO)

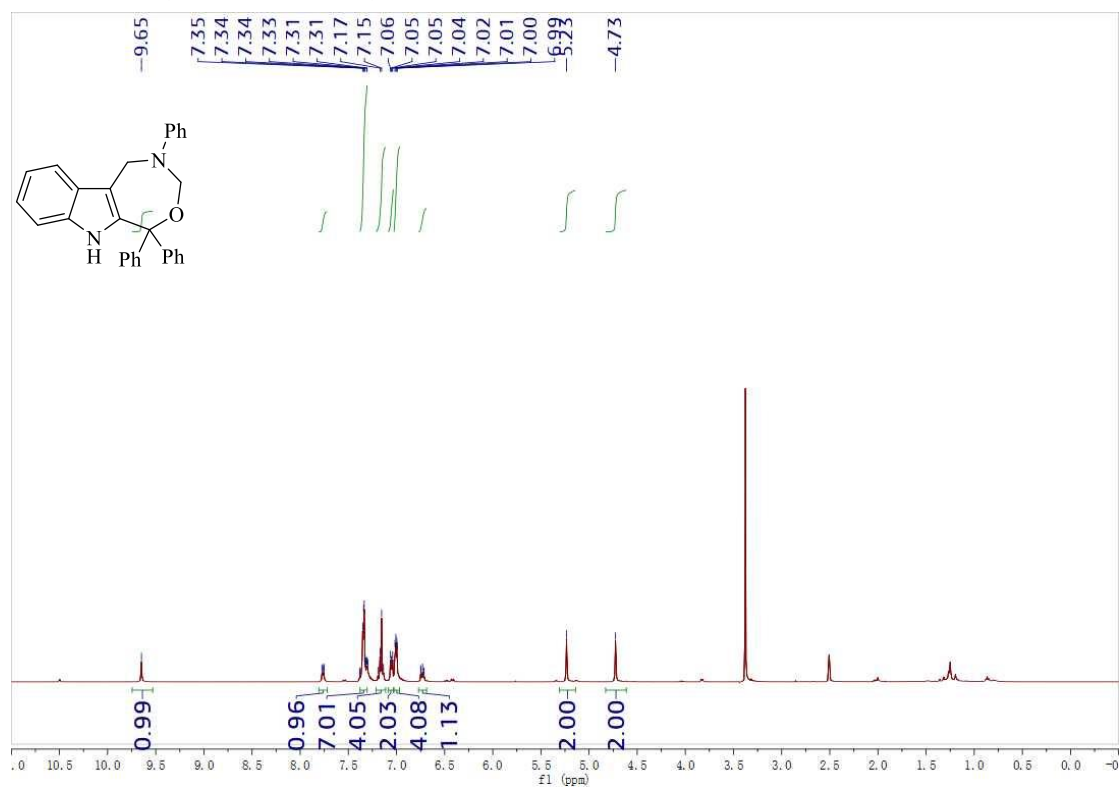

**4b**  $^{13}\text{C}$  NMR (100 MHz, DMSO)

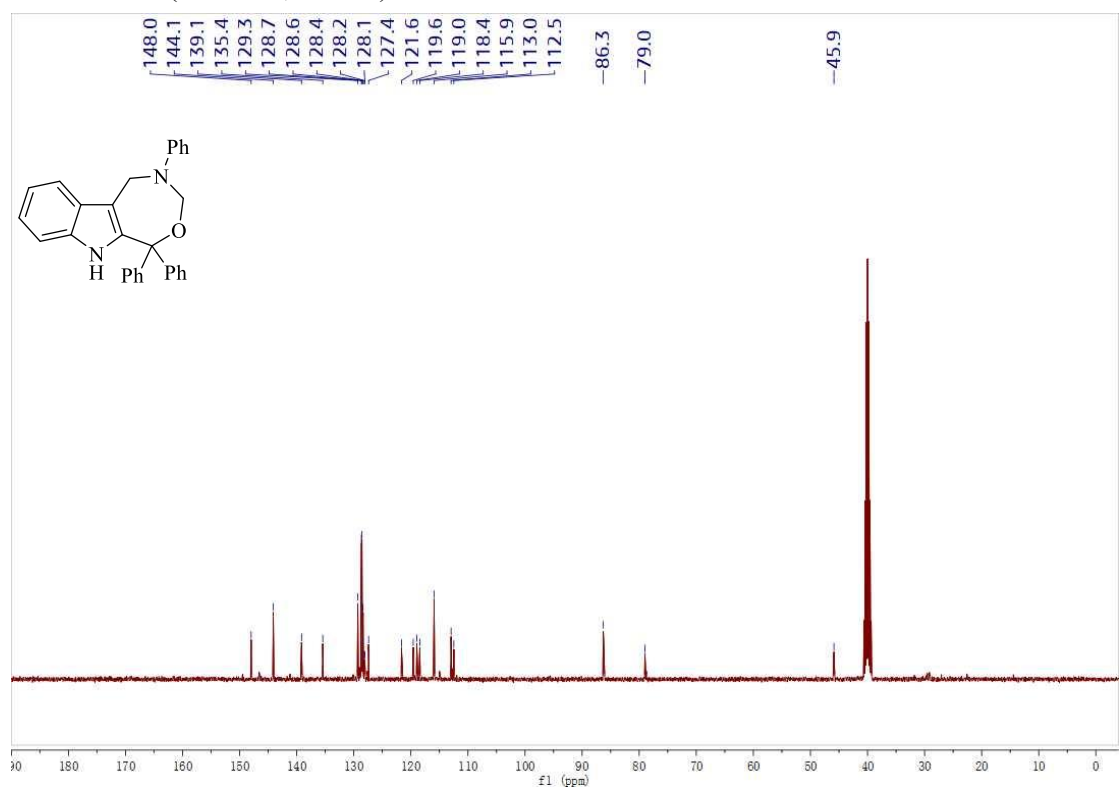

**4c**  $^1\text{H}$  NMR (400 MHz,  $\text{CDCl}_3$ )

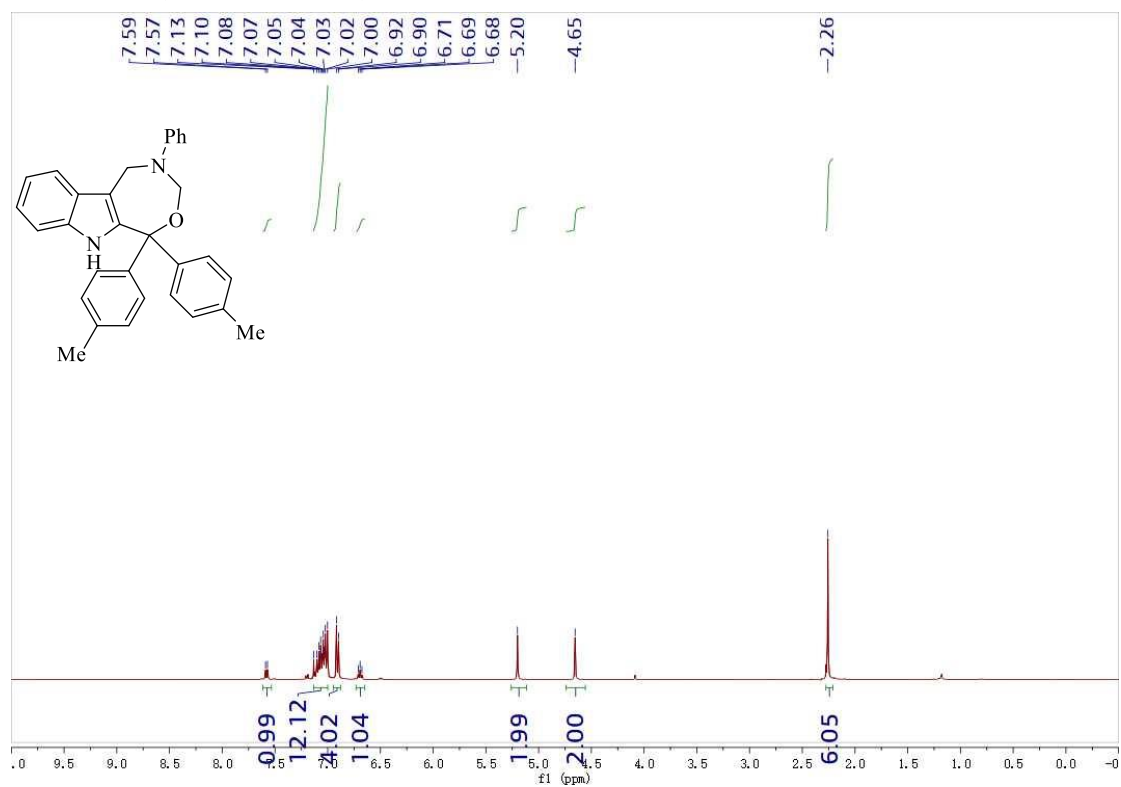

**4c**  $^{13}\text{C}$  NMR (100 MHz,  $\text{CDCl}_3$ )

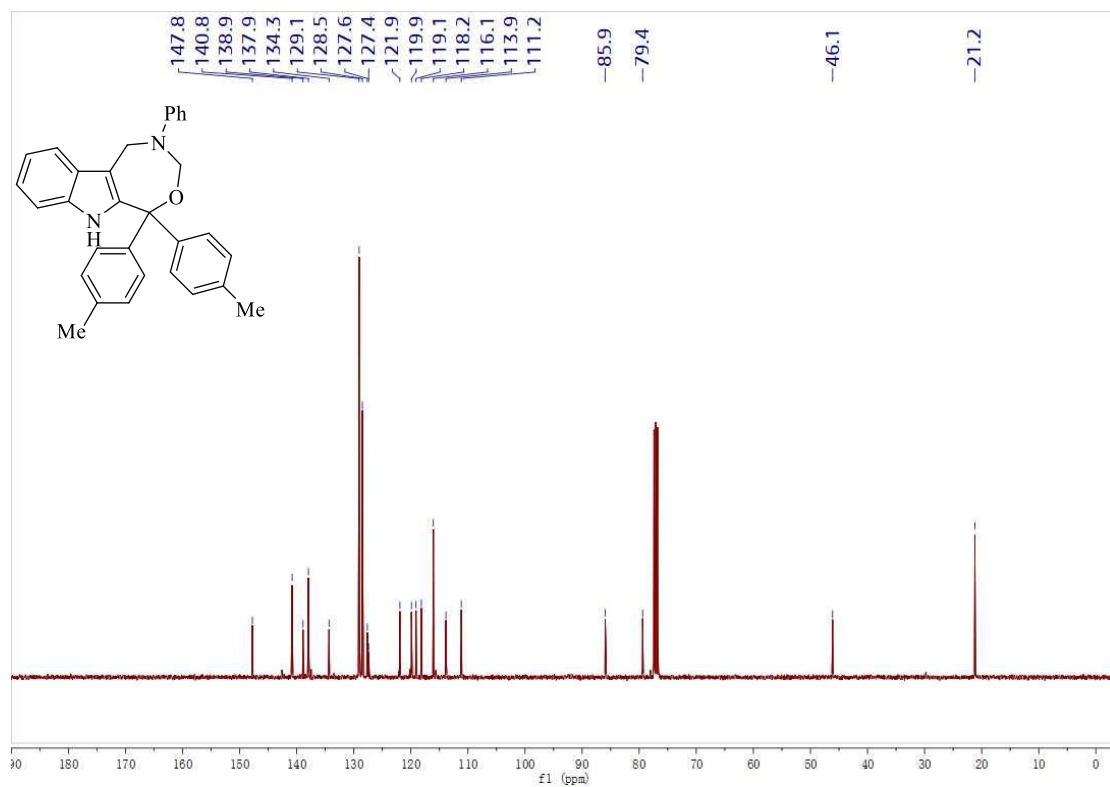

**4d**  $^1\text{H}$  NMR (400 MHz,  $\text{CDCl}_3$ )

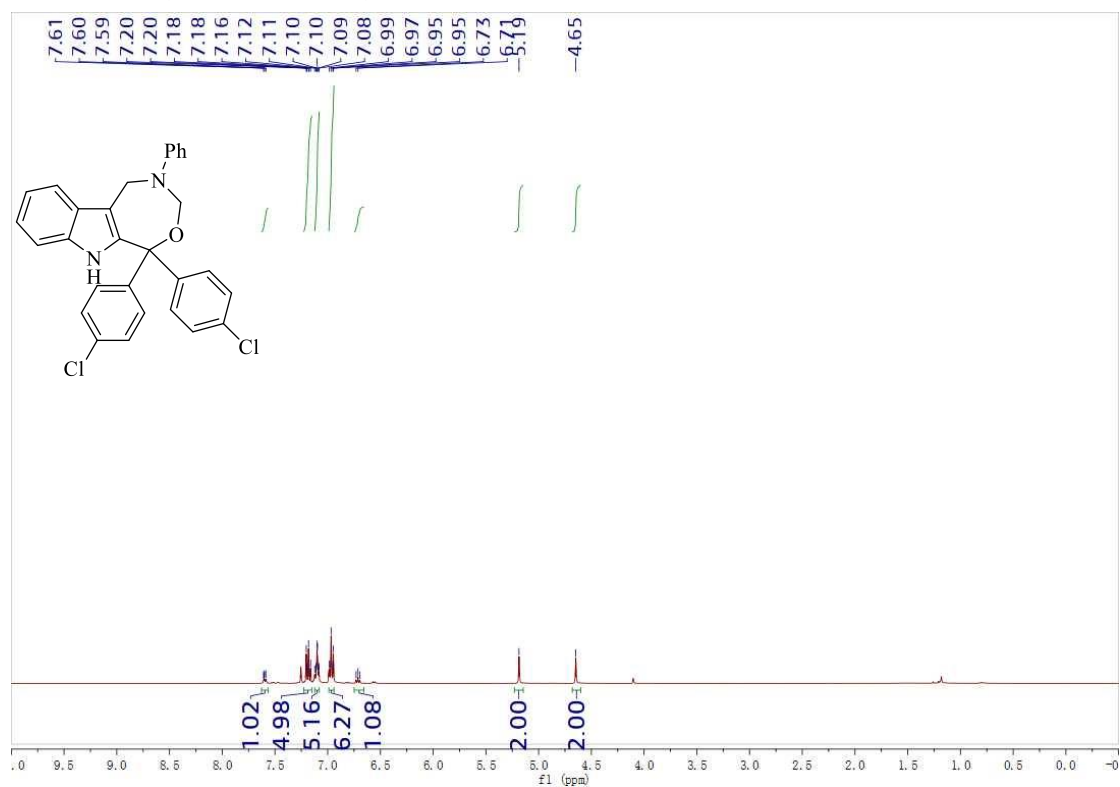

**4d**  $^{13}\text{C}$  NMR (100 MHz,  $\text{CDCl}_3$ )

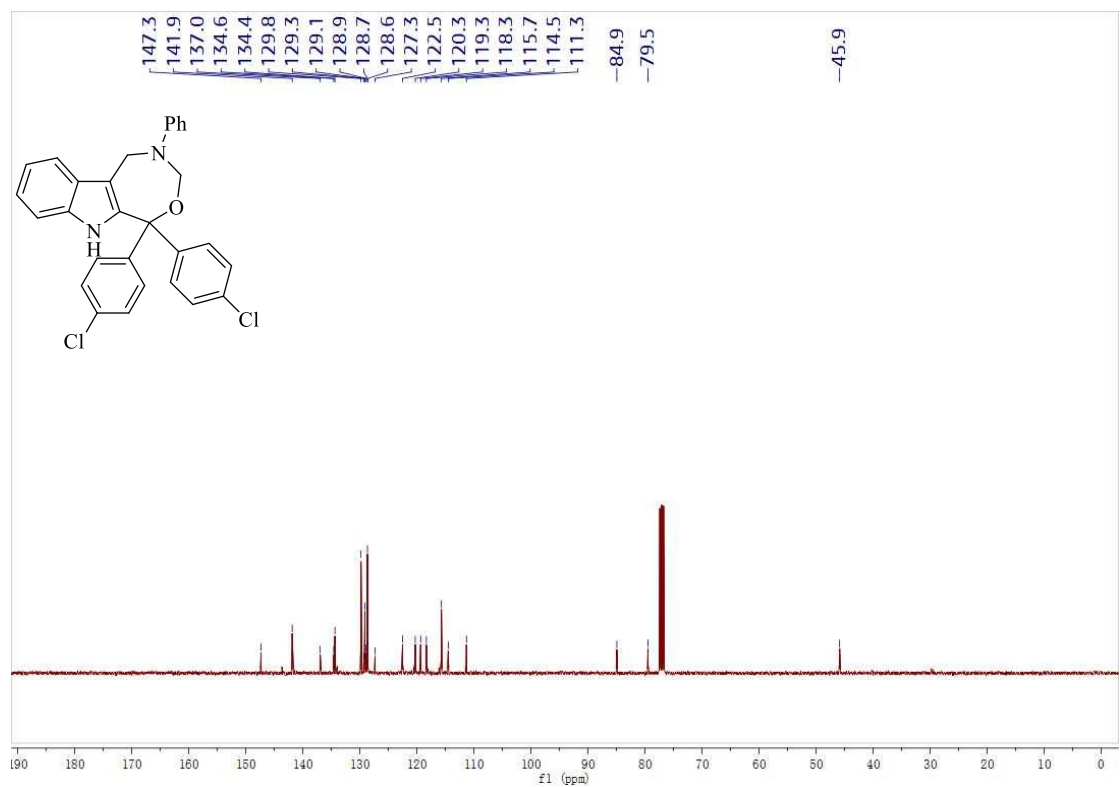

**4e** <sup>1</sup>H NMR (400 MHz, DMSO)

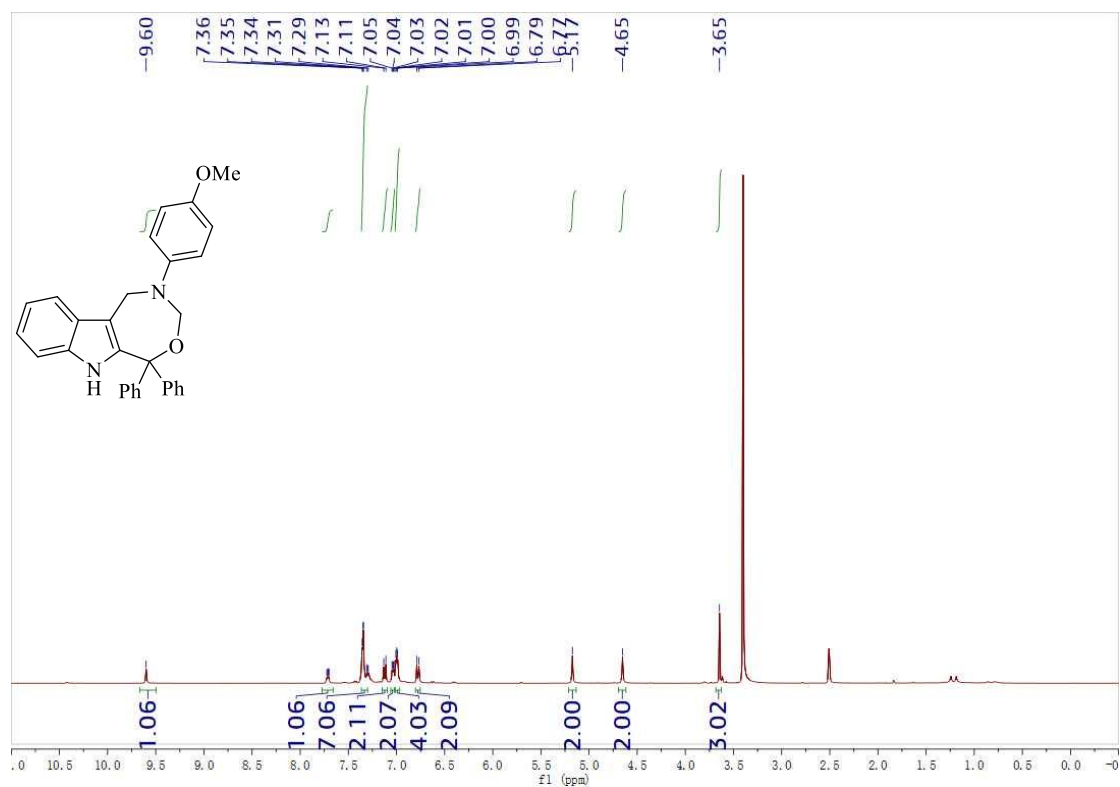

**4e** <sup>13</sup>C NMR (100 MHz, DMSO)

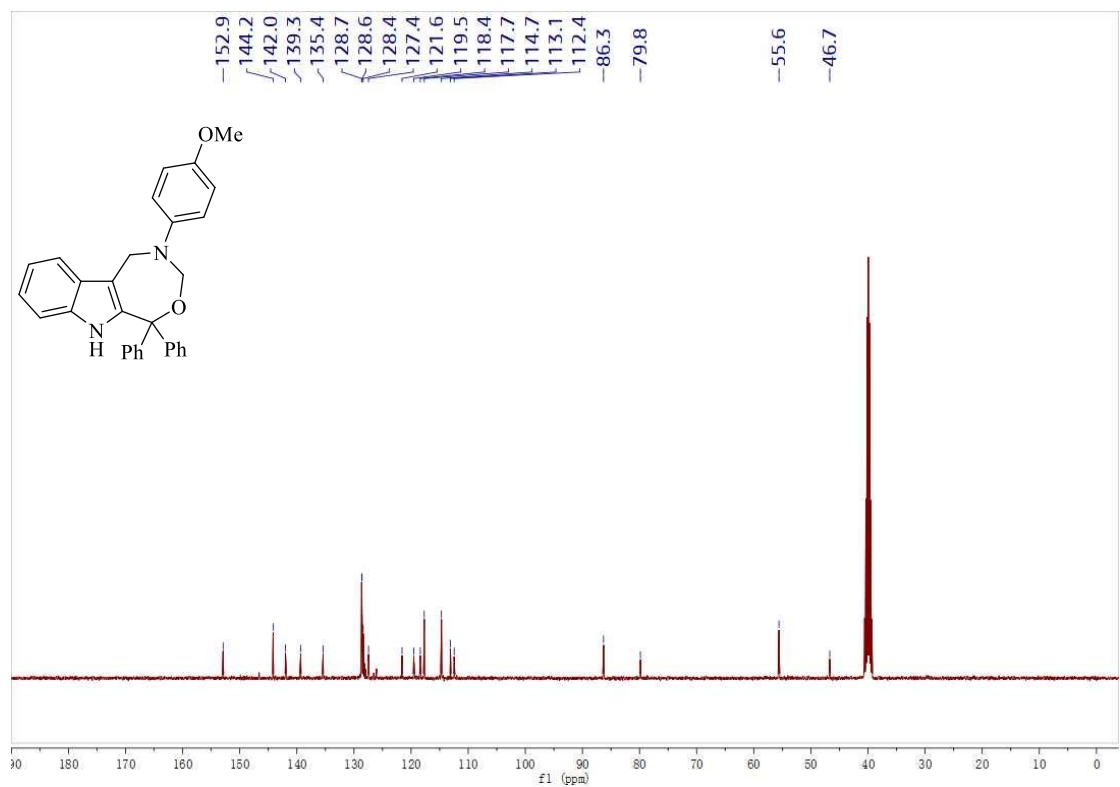

**4f** <sup>1</sup>H NMR (400 MHz, CDCl<sub>3</sub>)

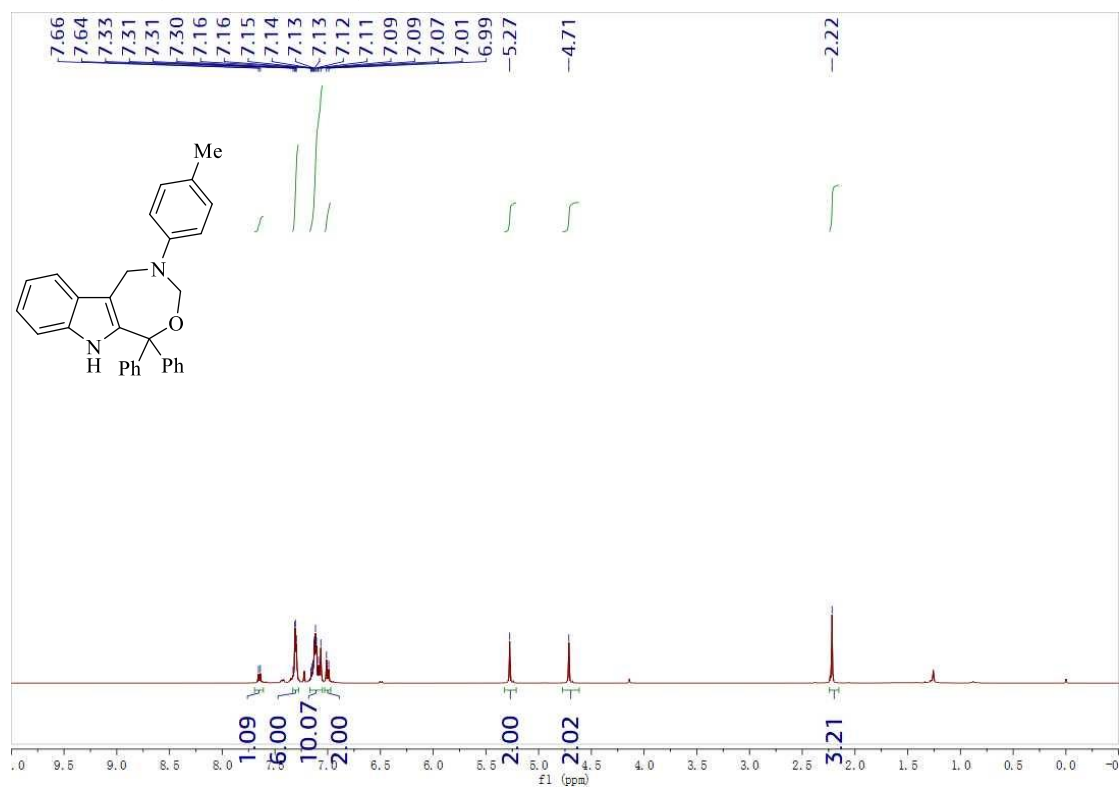

**4f** <sup>13</sup>C NMR (100 MHz, CDCl<sub>3</sub>)

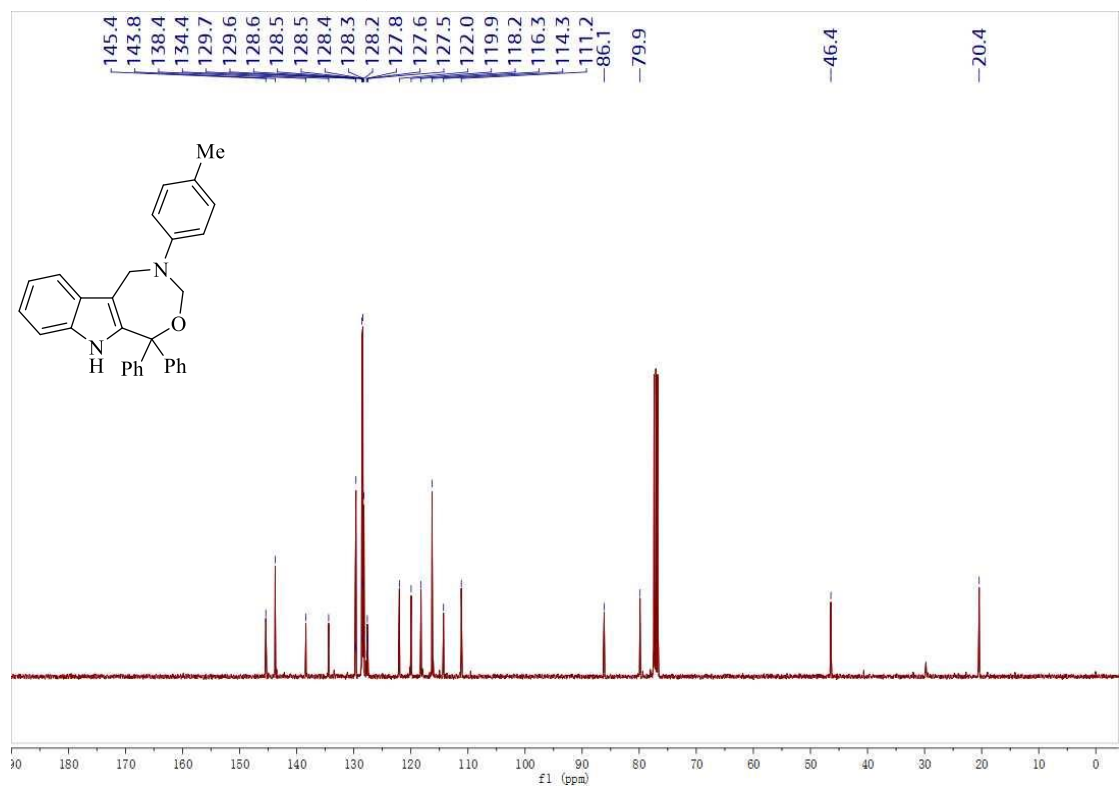



**4g** <sup>1</sup>H NMR (400 MHz, CDCl<sub>3</sub>)

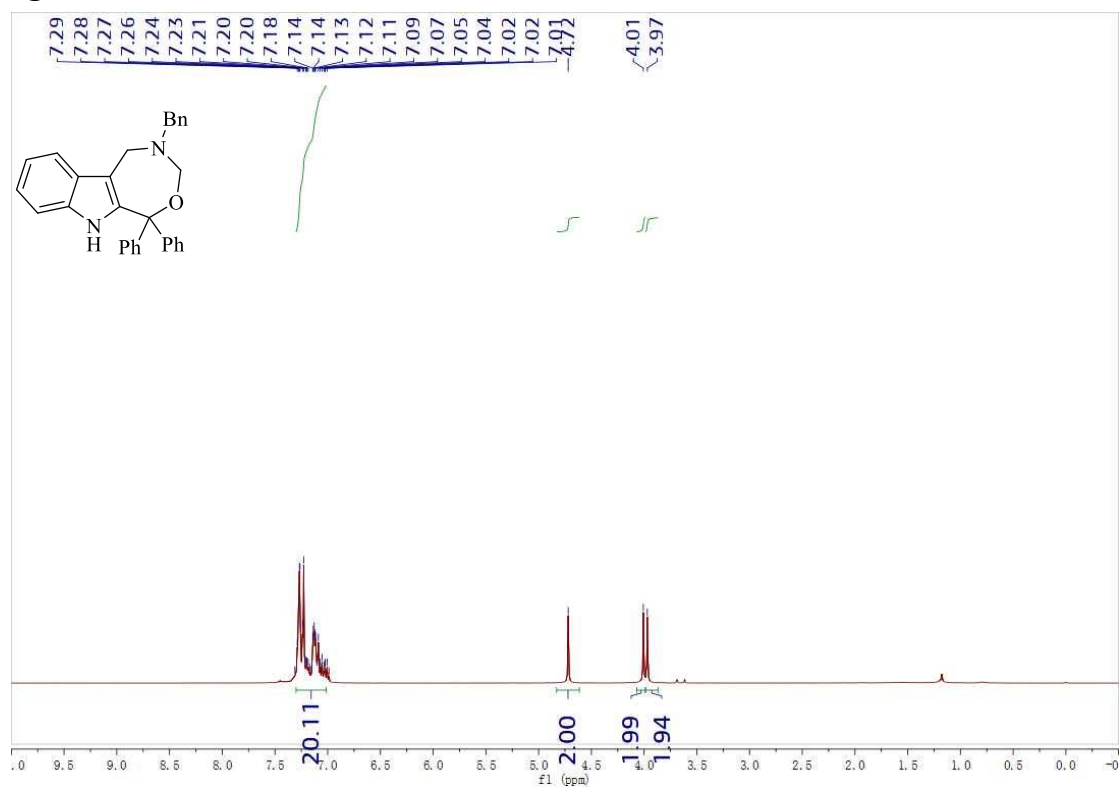

**4g** <sup>13</sup>C NMR (100 MHz, CDCl<sub>3</sub>)

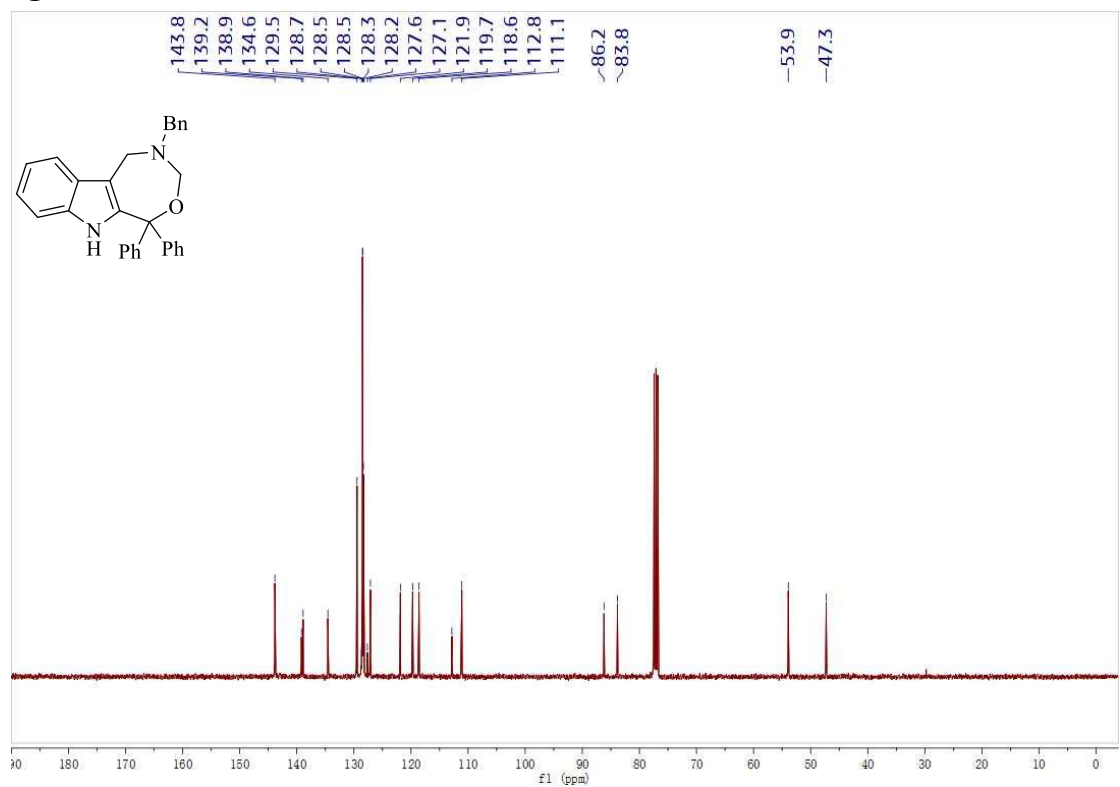

**4h** <sup>1</sup>H NMR (400 MHz, CDCl<sub>3</sub>)

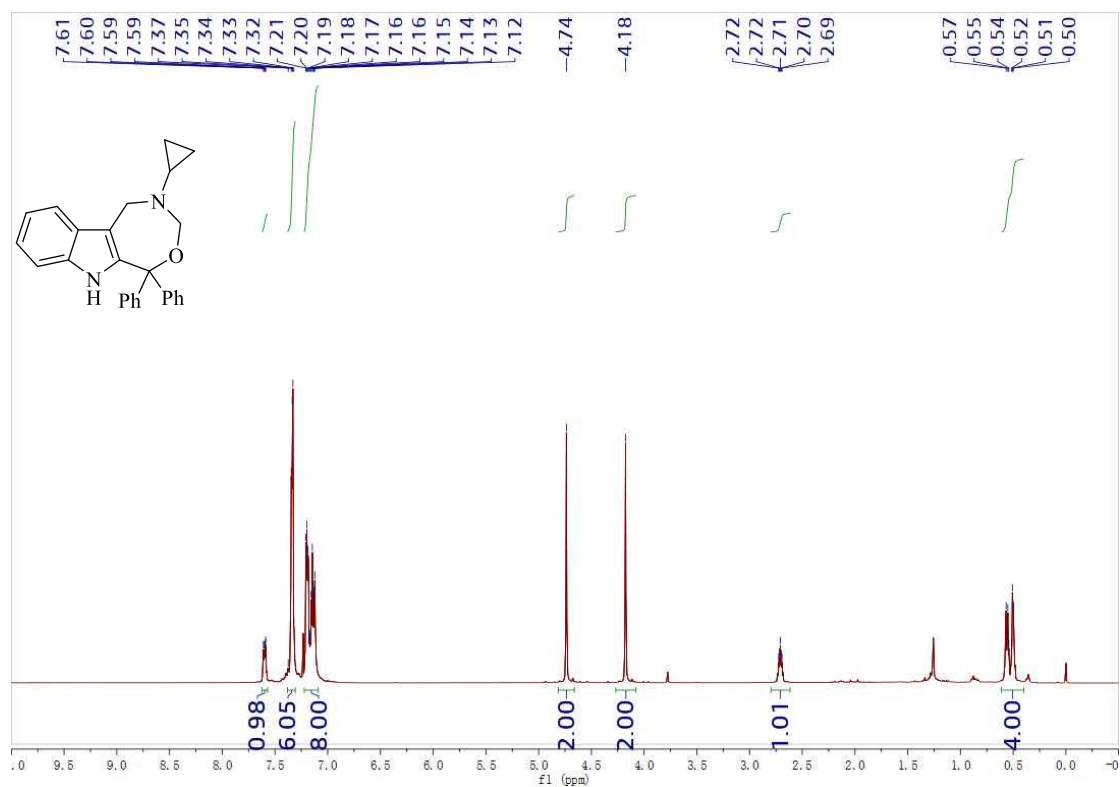

**4h** <sup>13</sup>C NMR (100 MHz, CDCl<sub>3</sub>)

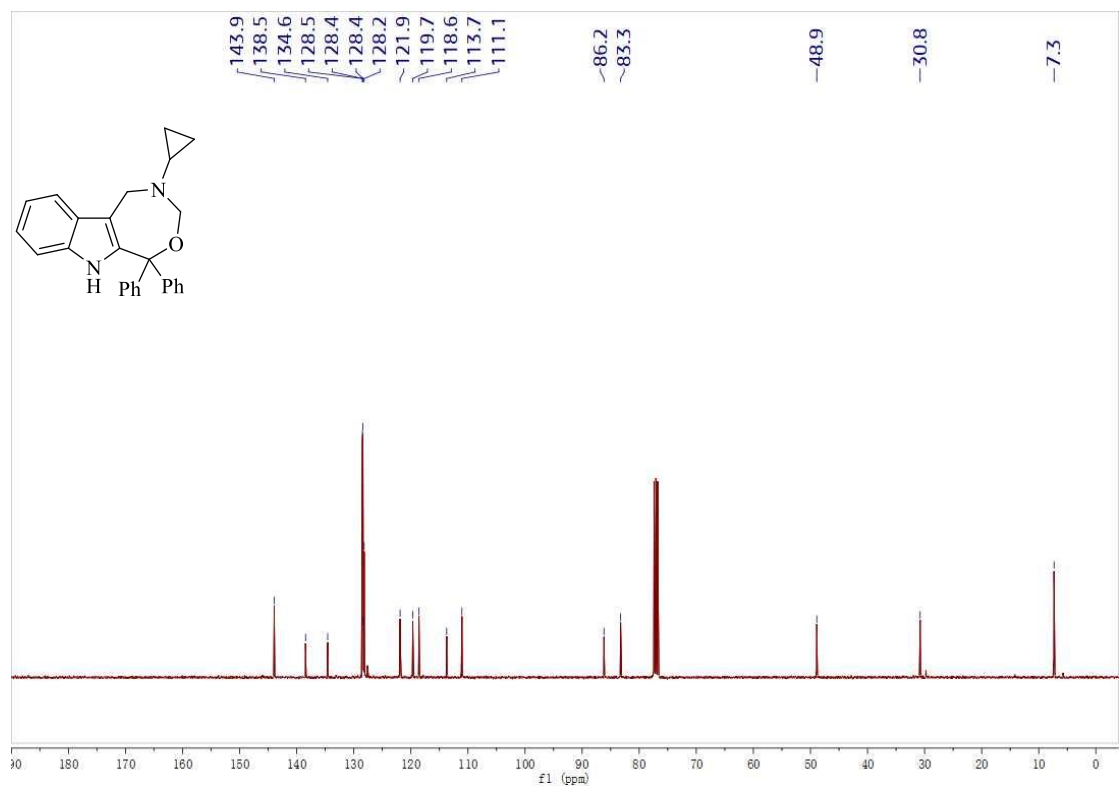

**4i** <sup>1</sup>H NMR (400 MHz, CDCl<sub>3</sub>)

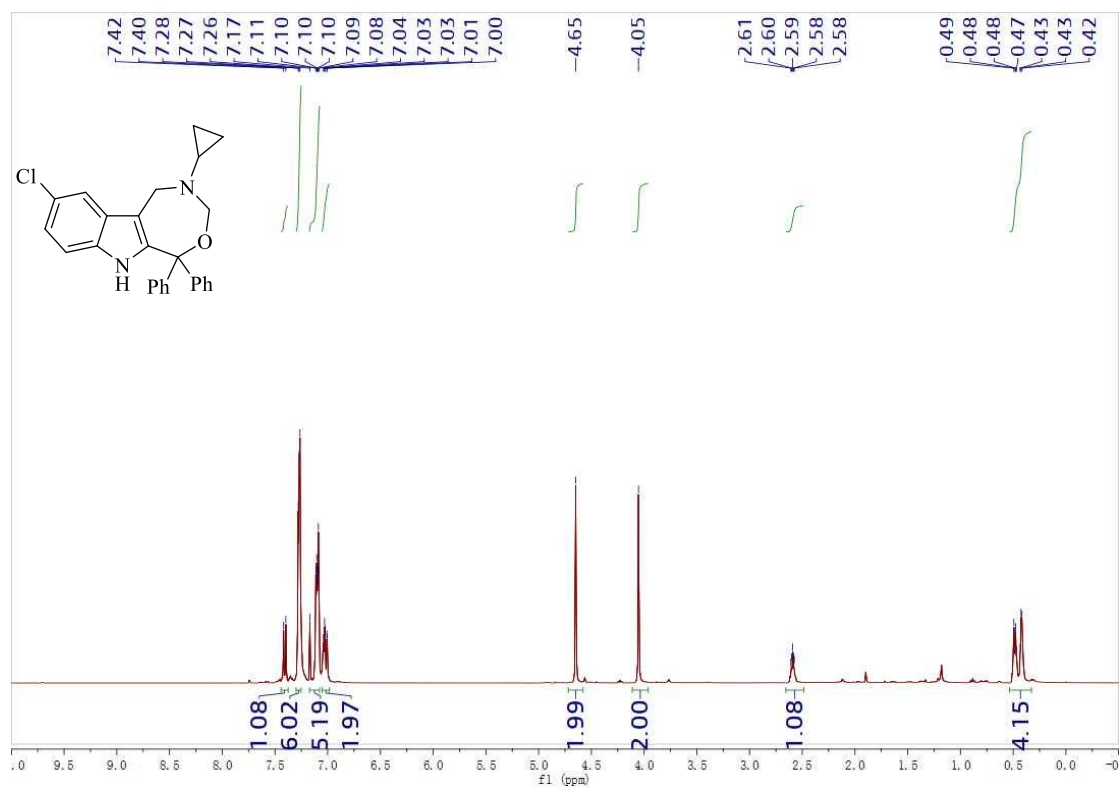

**4i** <sup>13</sup>C NMR (100 MHz, CDCl<sub>3</sub>)

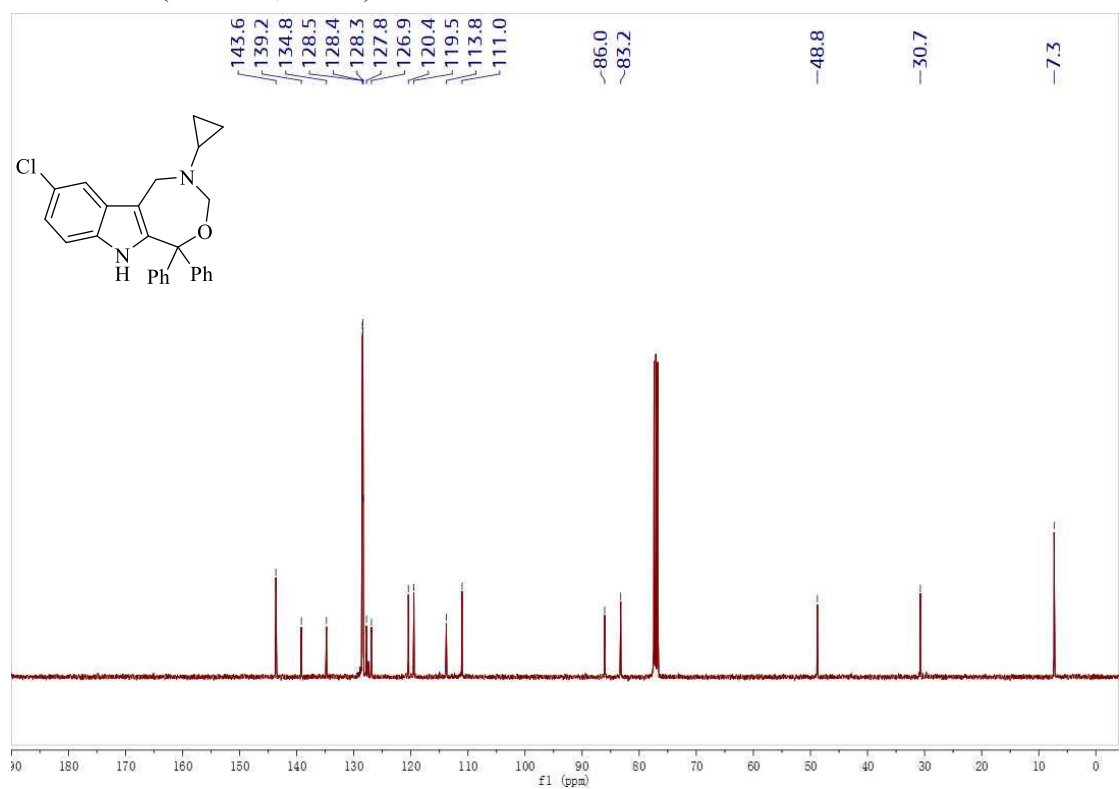

**4j** <sup>1</sup>H NMR (400 MHz, CDCl<sub>3</sub>)

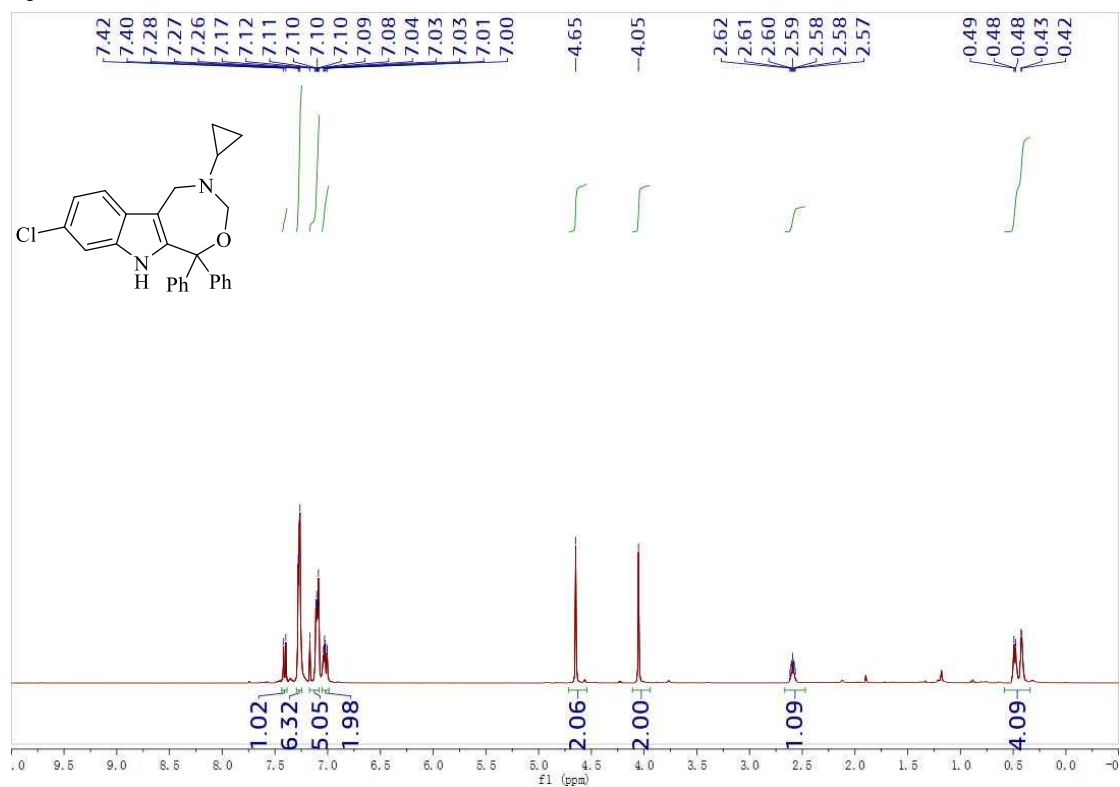

**4j** <sup>13</sup>C NMR (100 MHz, CDCl<sub>3</sub>)

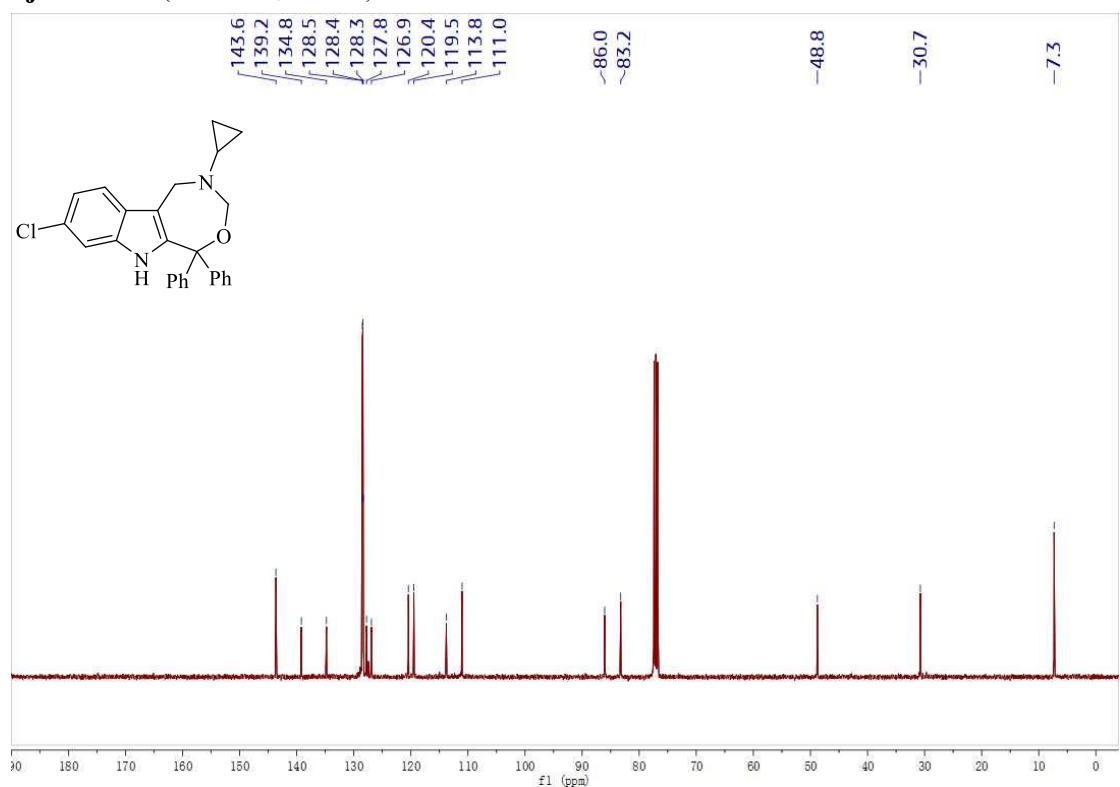

**4k**  $^1\text{H}$  NMR (400 MHz,  $\text{CDCl}_3$ )

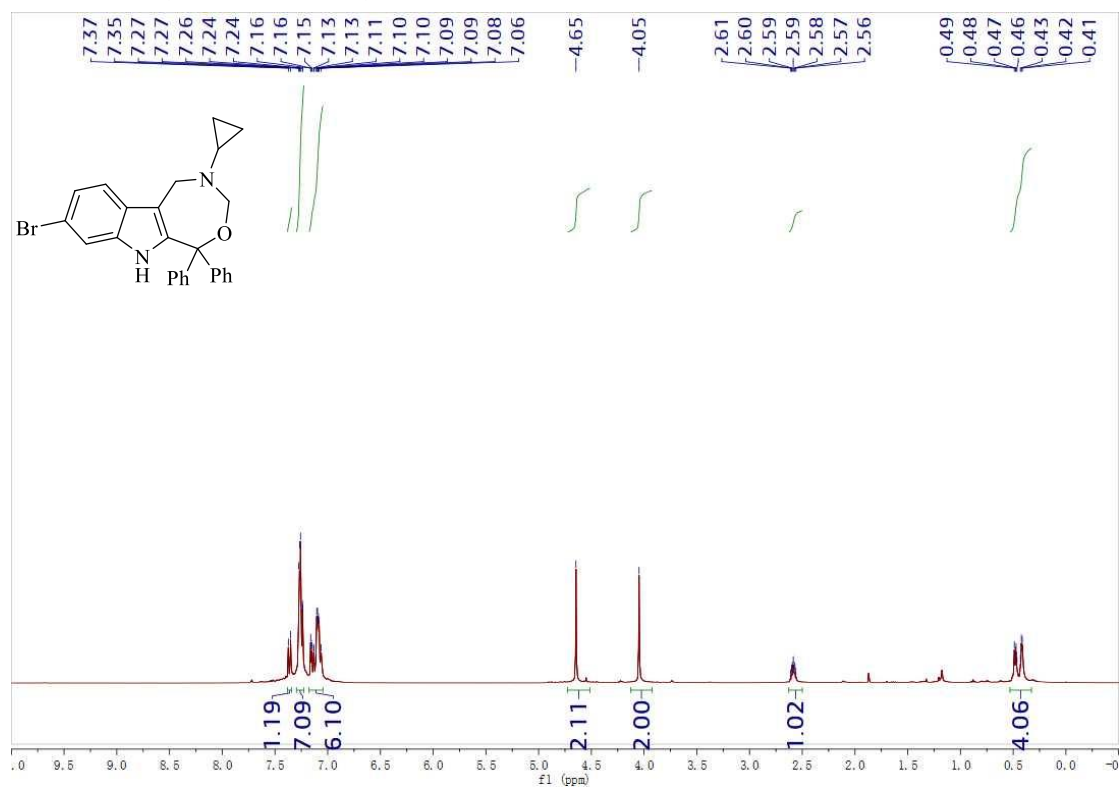

**4k**  $^{13}\text{C}$  NMR (100 MHz,  $\text{CDCl}_3$ )

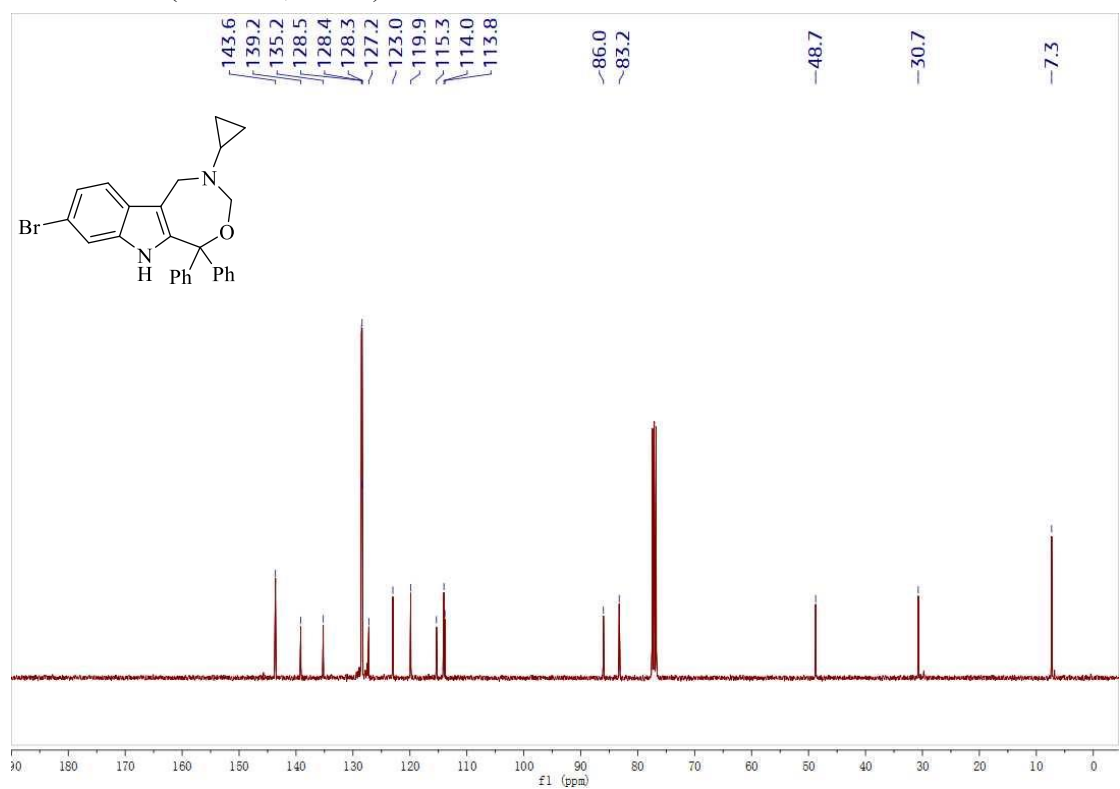

**41** <sup>1</sup>H NMR (400 MHz, CDCl<sub>3</sub>)

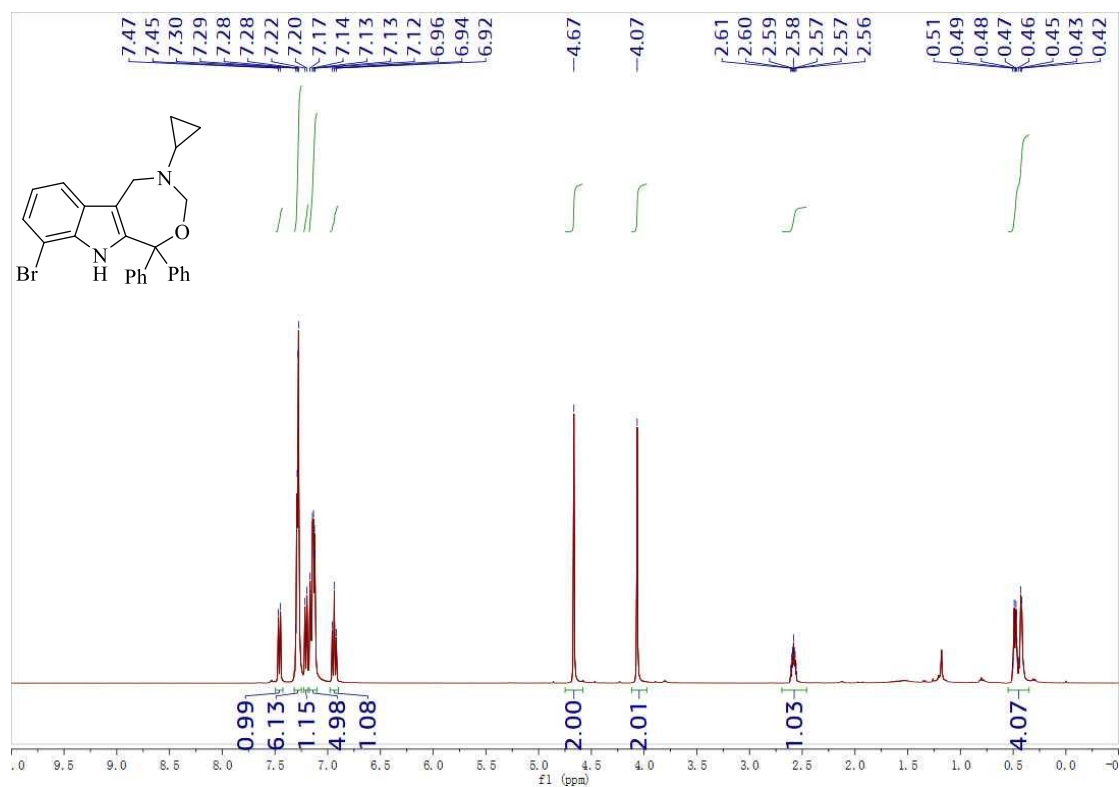

**41** <sup>13</sup>C NMR (100 MHz, CDCl<sub>3</sub>)

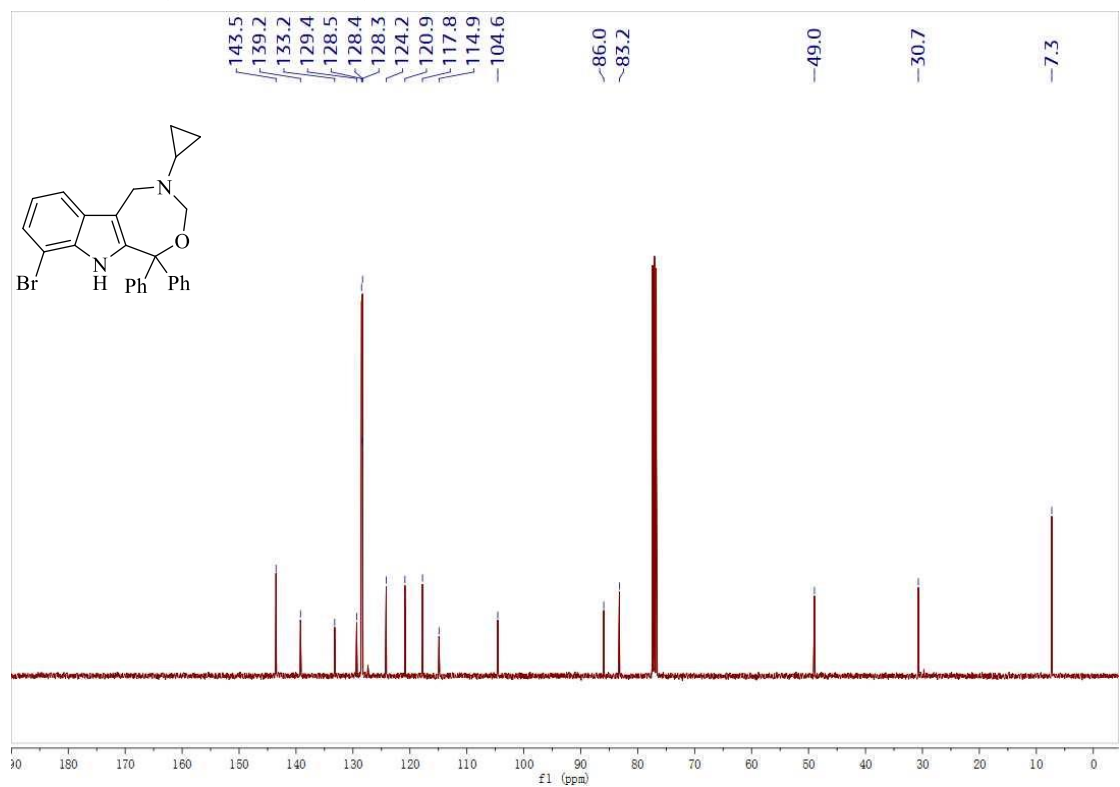

**4m**  $^1\text{H}$  NMR (400 MHz, DMSO)

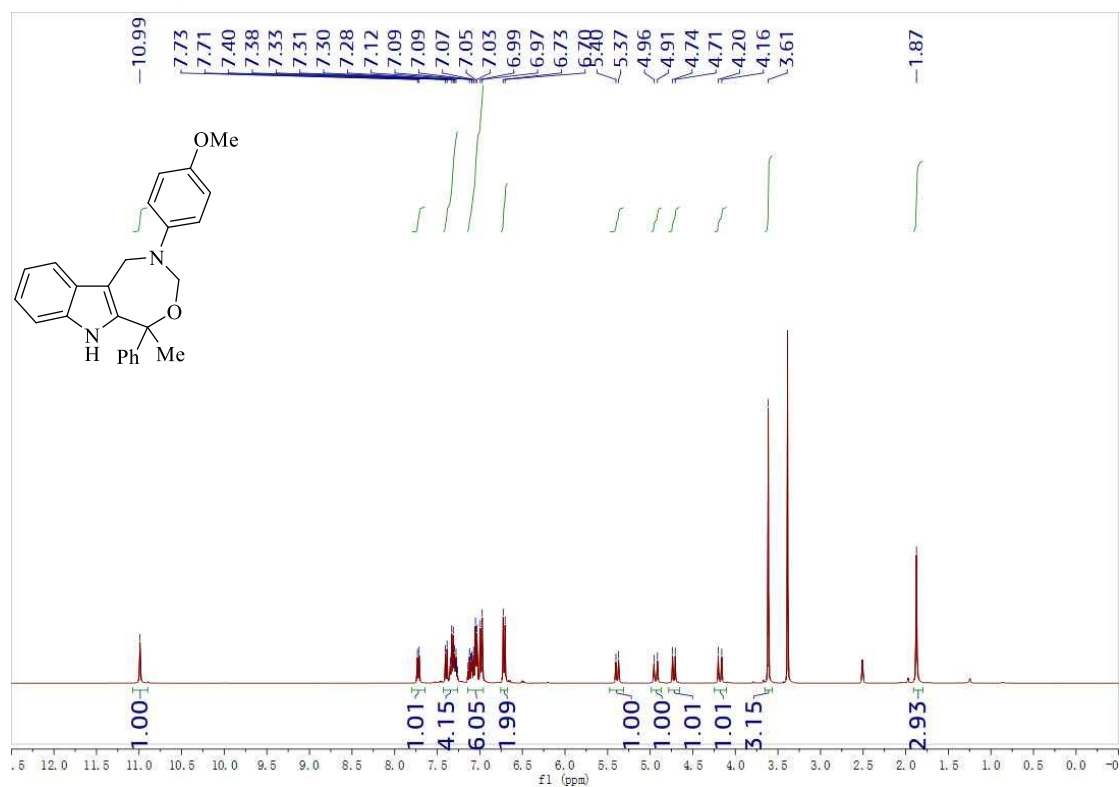

**4m**  $^{13}\text{C}$  NMR (100 MHz, DMSO)

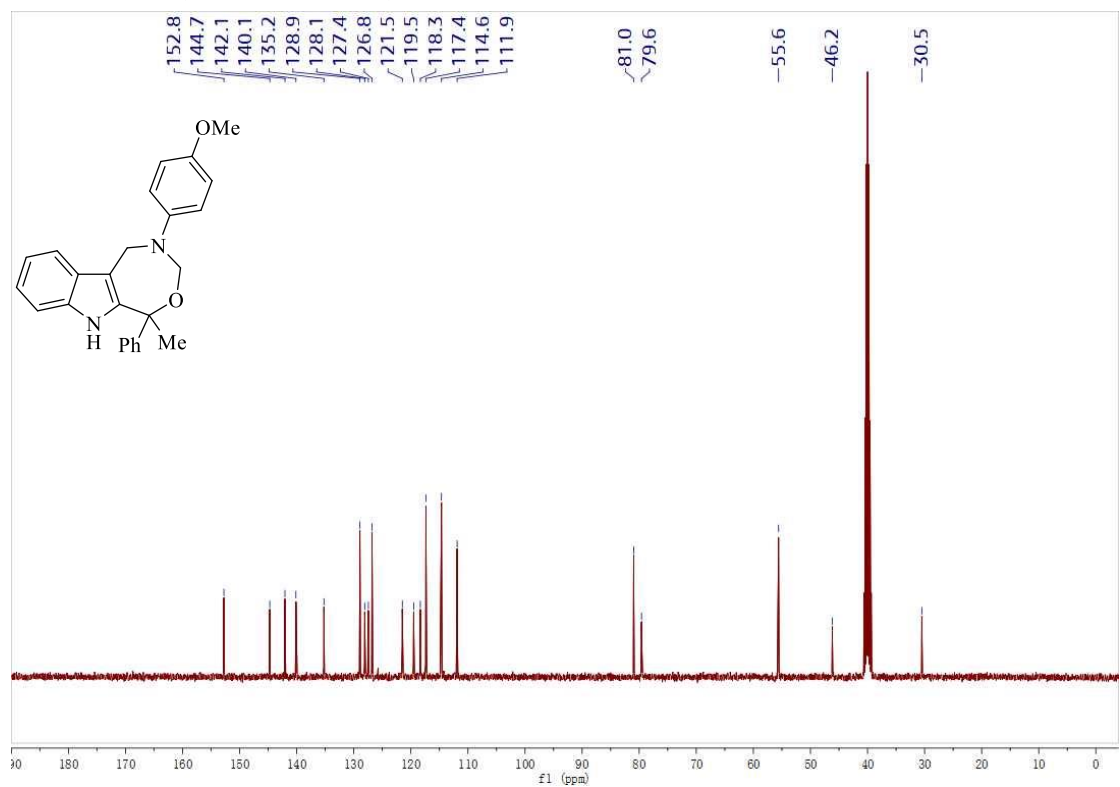

**4n**  $^1\text{H}$  NMR (400 MHz,  $\text{CDCl}_3$ )

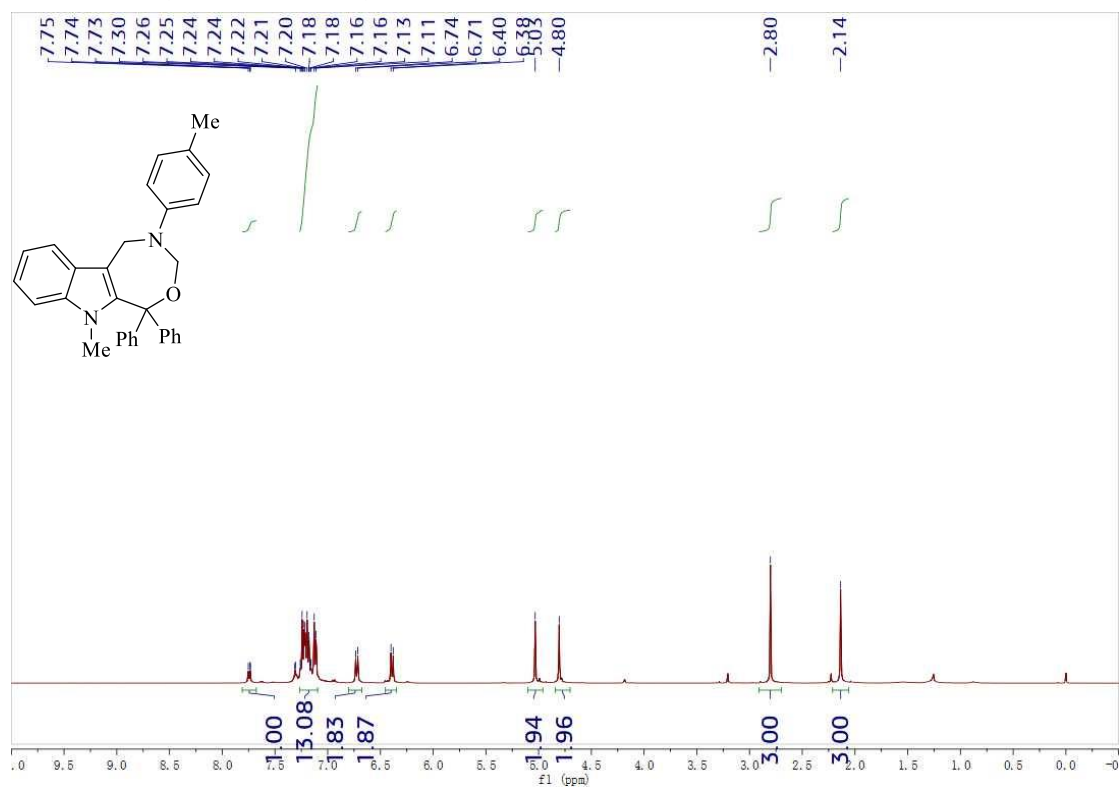

**4n**  $^{13}\text{C}$  NMR (100 MHz,  $\text{CDCl}_3$ )

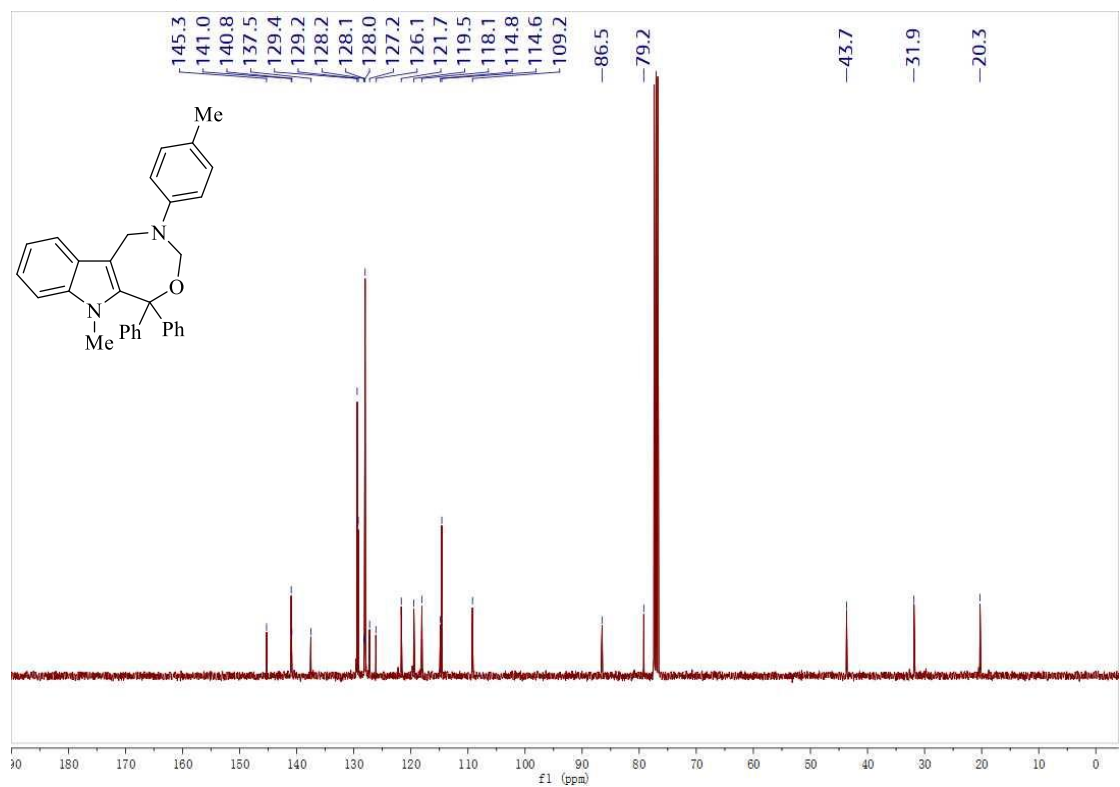



**Int-4b**  $^1\text{H}$  NMR (400 MHz,  $\text{CDCl}_3$ )

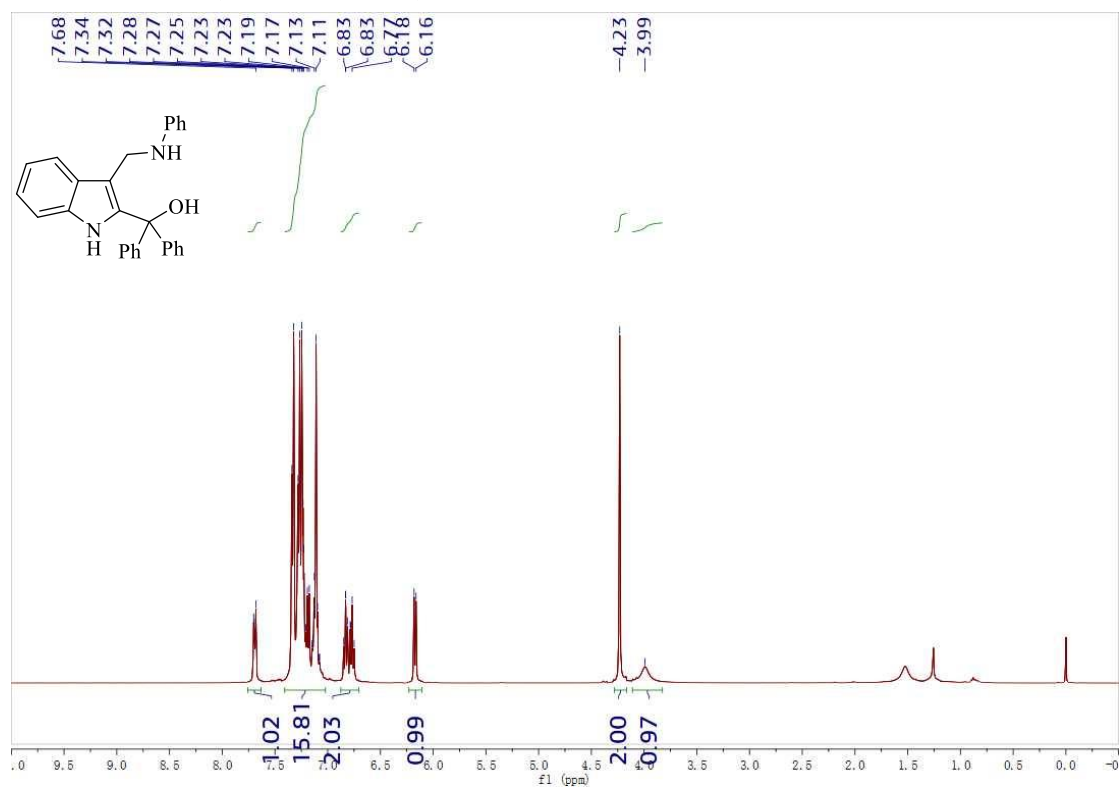

**Int-4b**  $^{13}\text{C}$  NMR (100 MHz,  $\text{CDCl}_3$ )

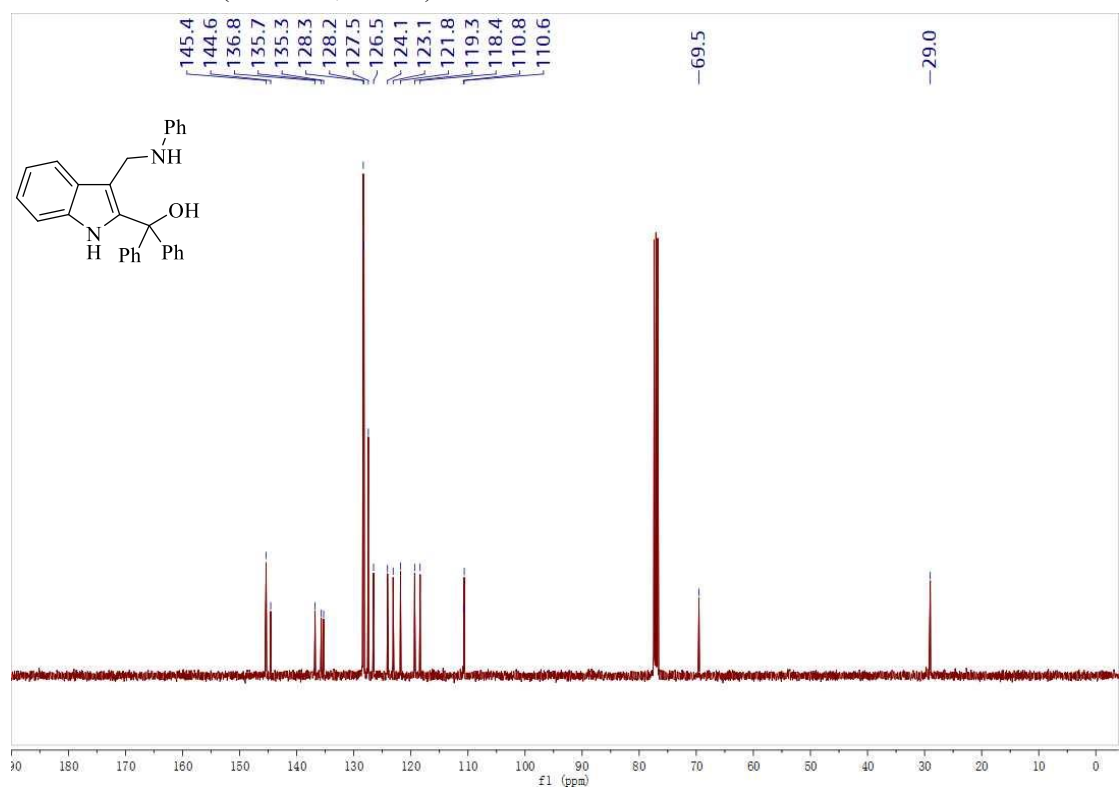

**5b'** <sup>1</sup>H NMR (400 MHz, CDCl<sub>3</sub>)

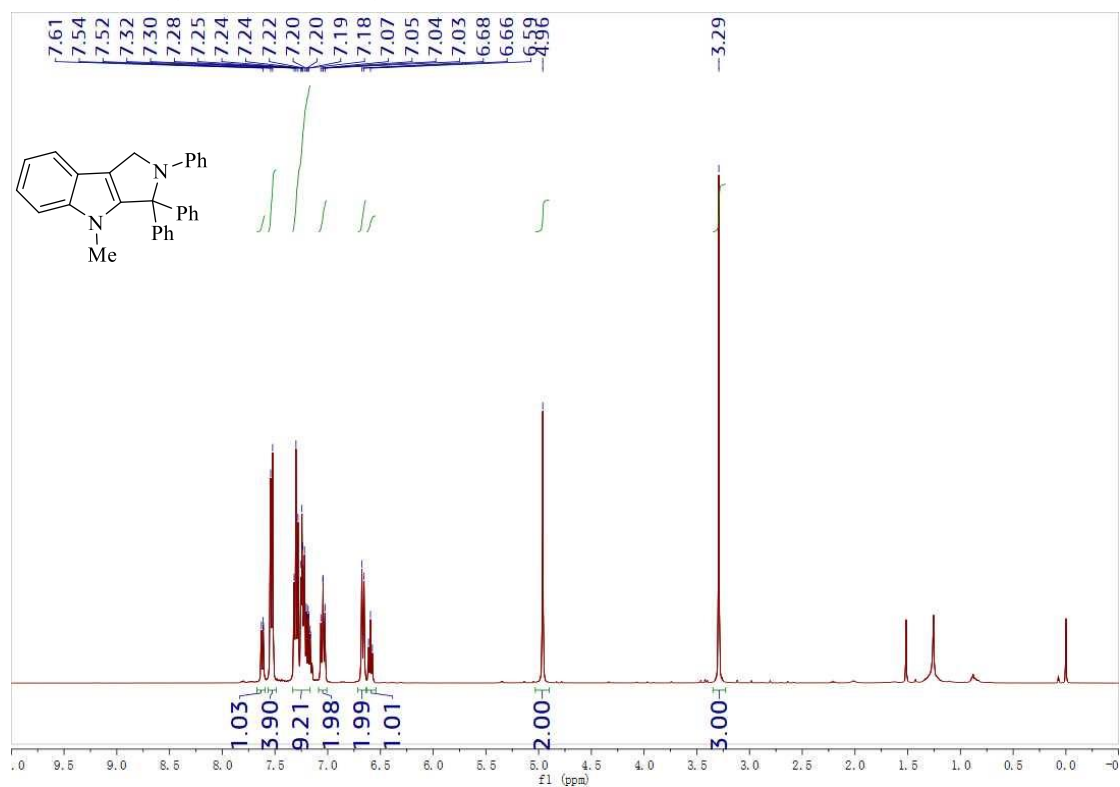

**5b'** <sup>13</sup>C NMR (100 MHz, CDCl<sub>3</sub>)

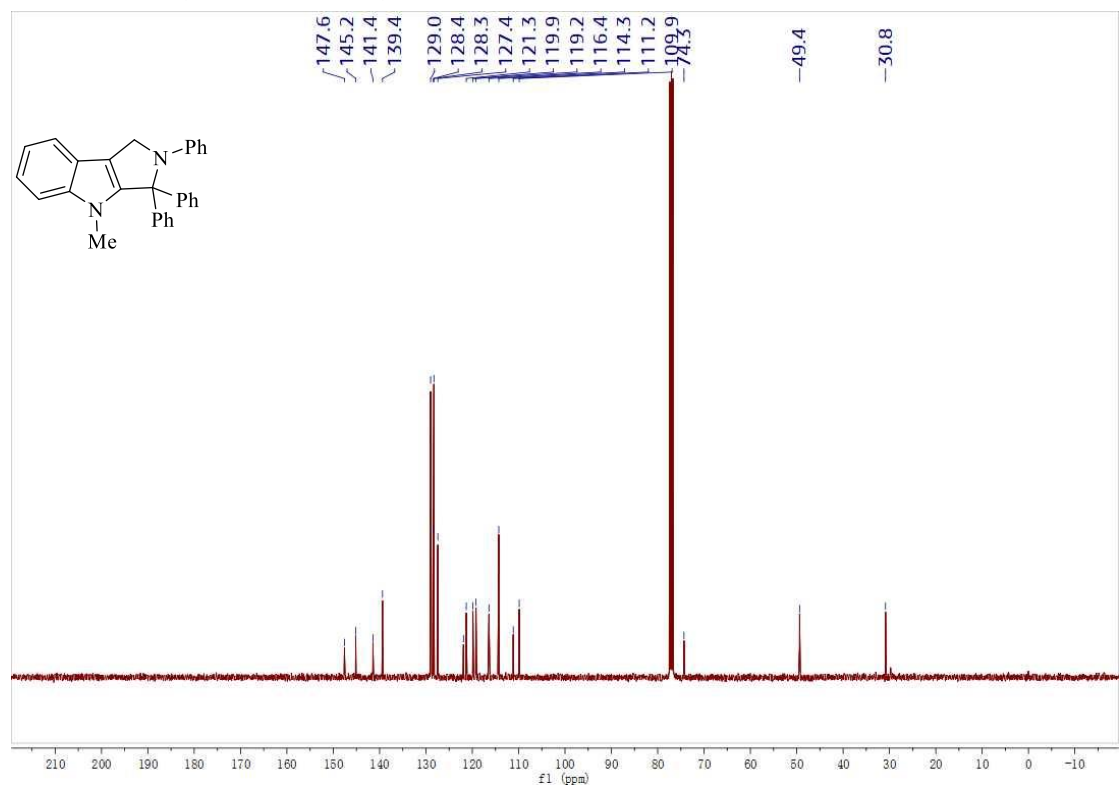

**5c'** <sup>1</sup>H NMR (400 MHz, CDCl<sub>3</sub>)

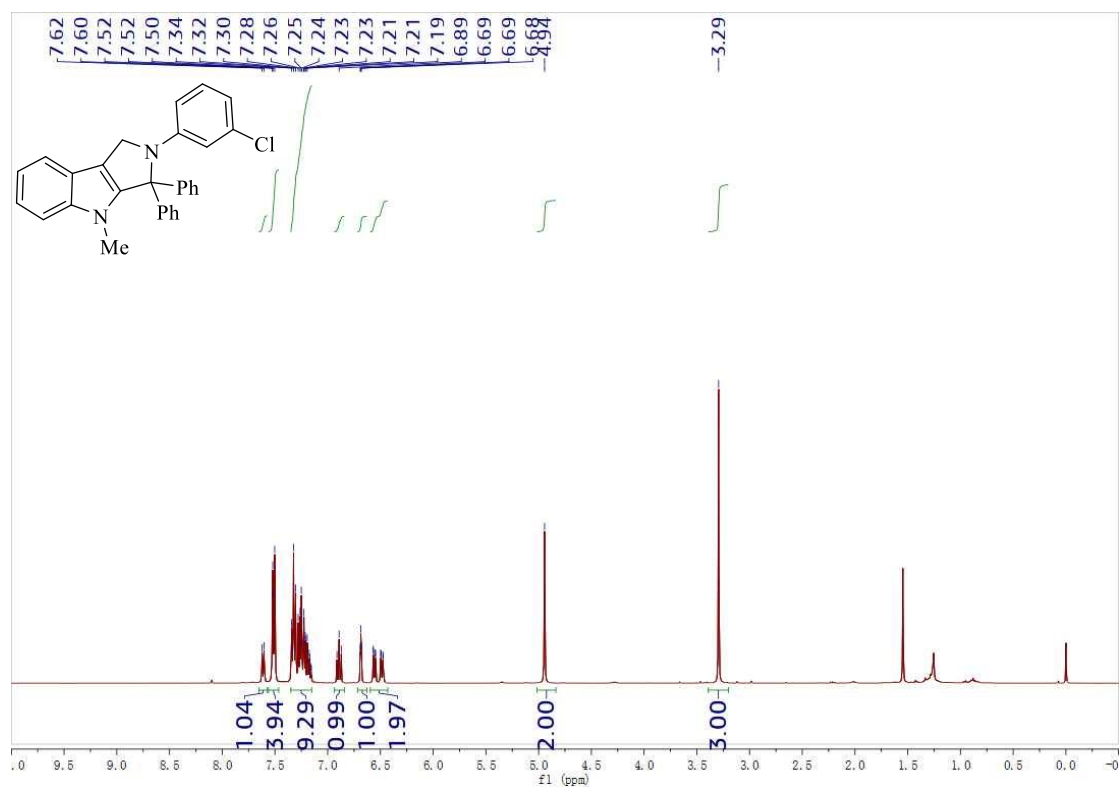

**5c'** <sup>13</sup>C NMR (100 MHz, CDCl<sub>3</sub>)

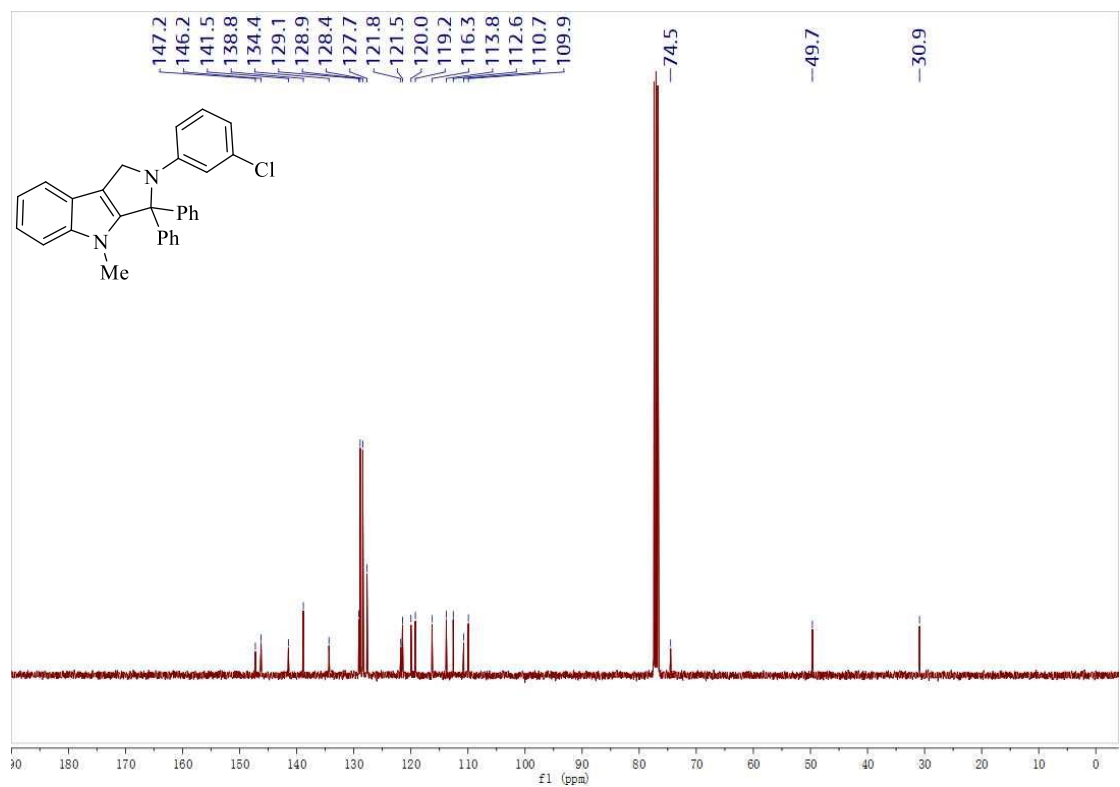

**5d'** <sup>1</sup>H NMR (400 MHz, CDCl<sub>3</sub>)

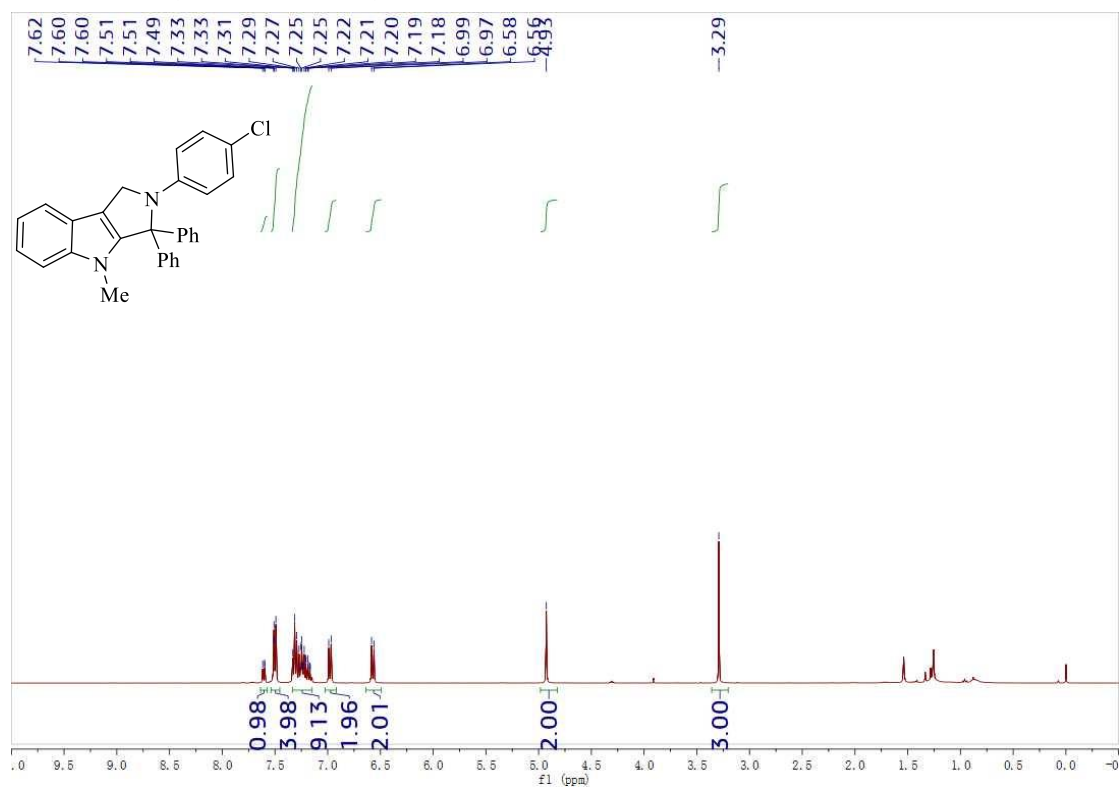

**5d'** <sup>13</sup>C NMR (100 MHz, CDCl<sub>3</sub>)

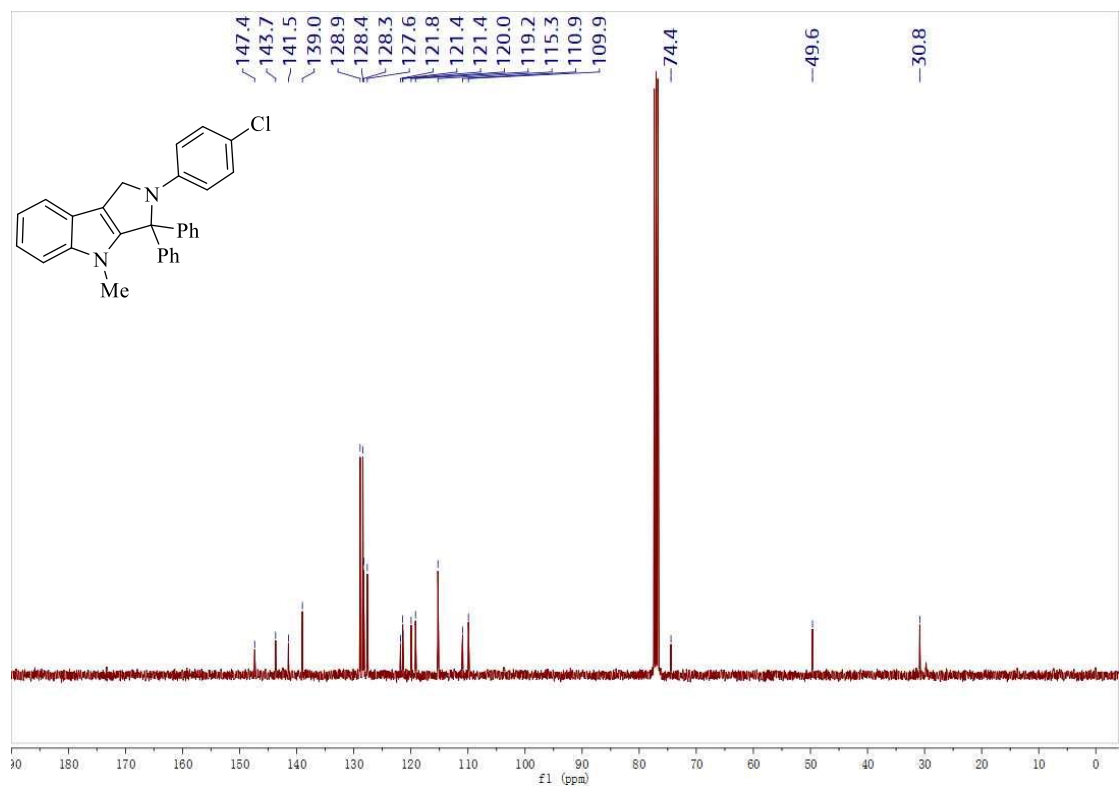

**5e'** <sup>1</sup>H NMR (400 MHz, CDCl<sub>3</sub>)

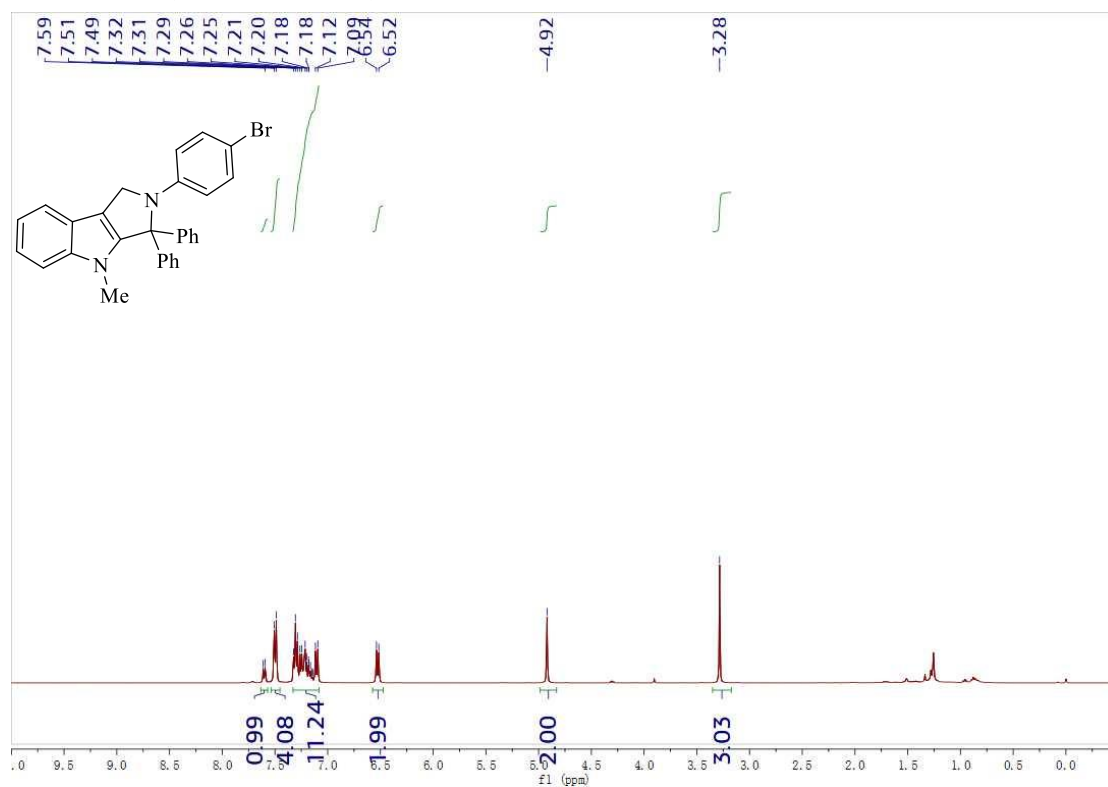

**5e'** <sup>13</sup>C NMR (100 MHz, CDCl<sub>3</sub>)

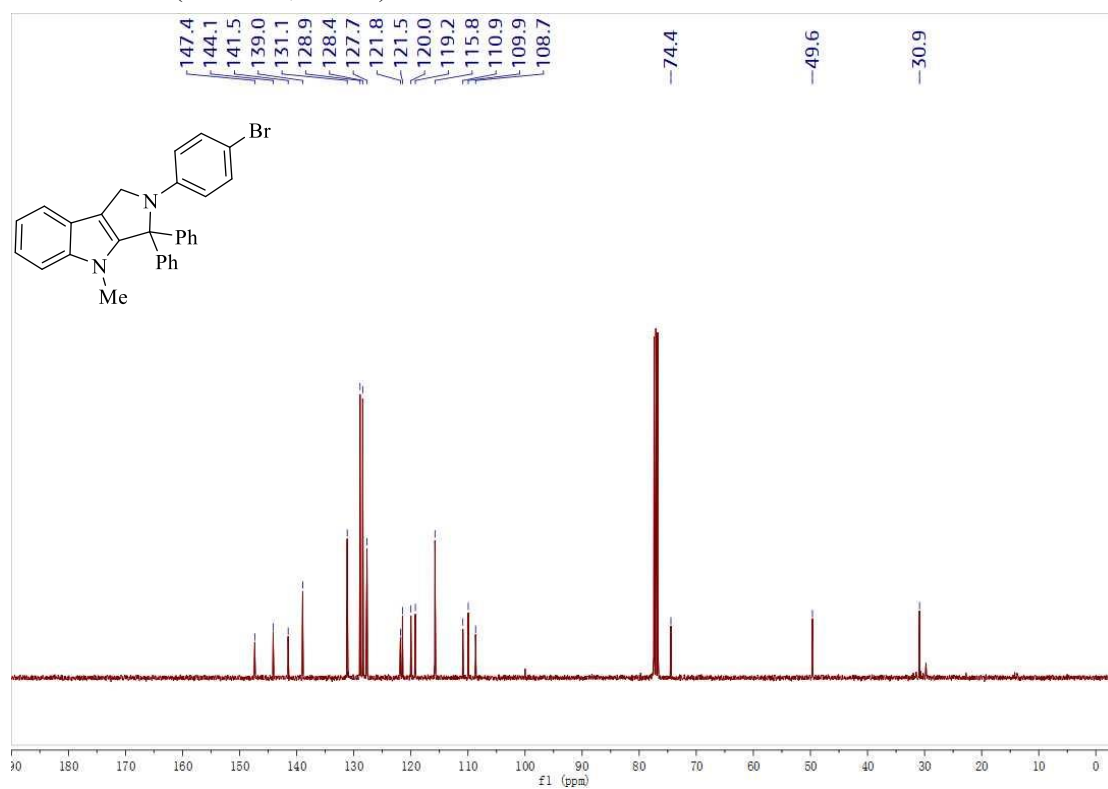

**5f'** <sup>1</sup>H NMR (400 MHz, CDCl<sub>3</sub>)

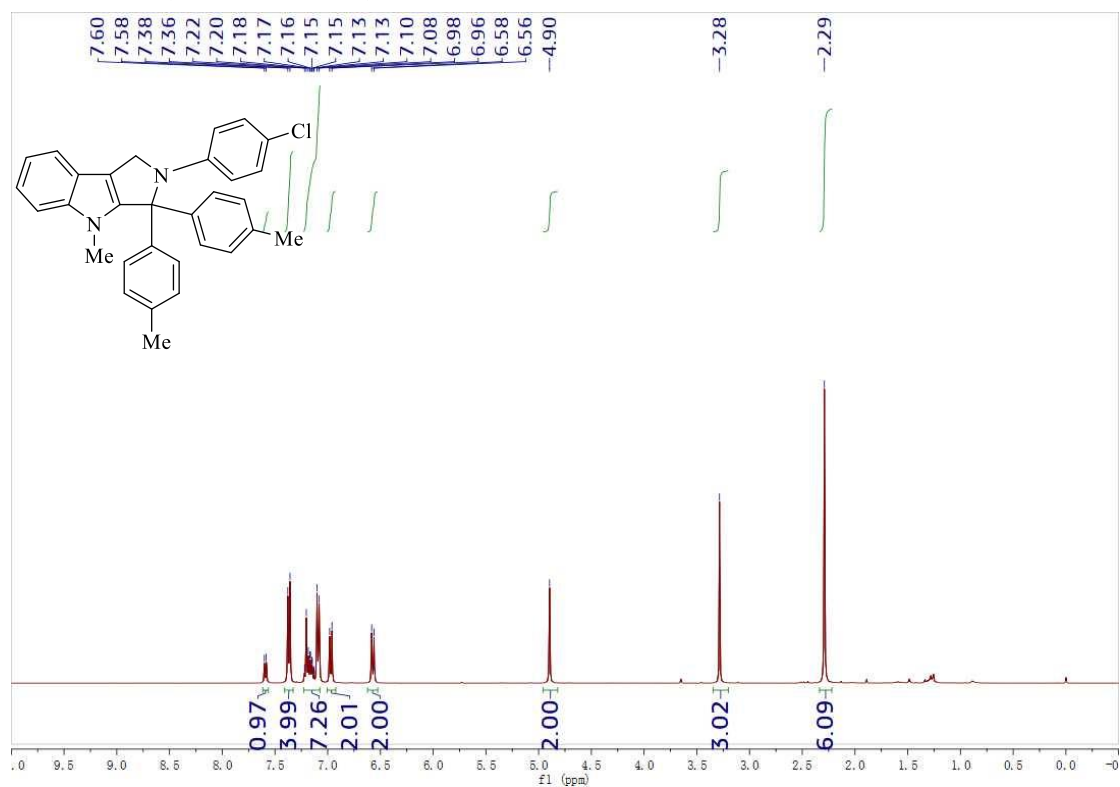

**5f'** <sup>13</sup>C NMR (100 MHz, CDCl<sub>3</sub>)

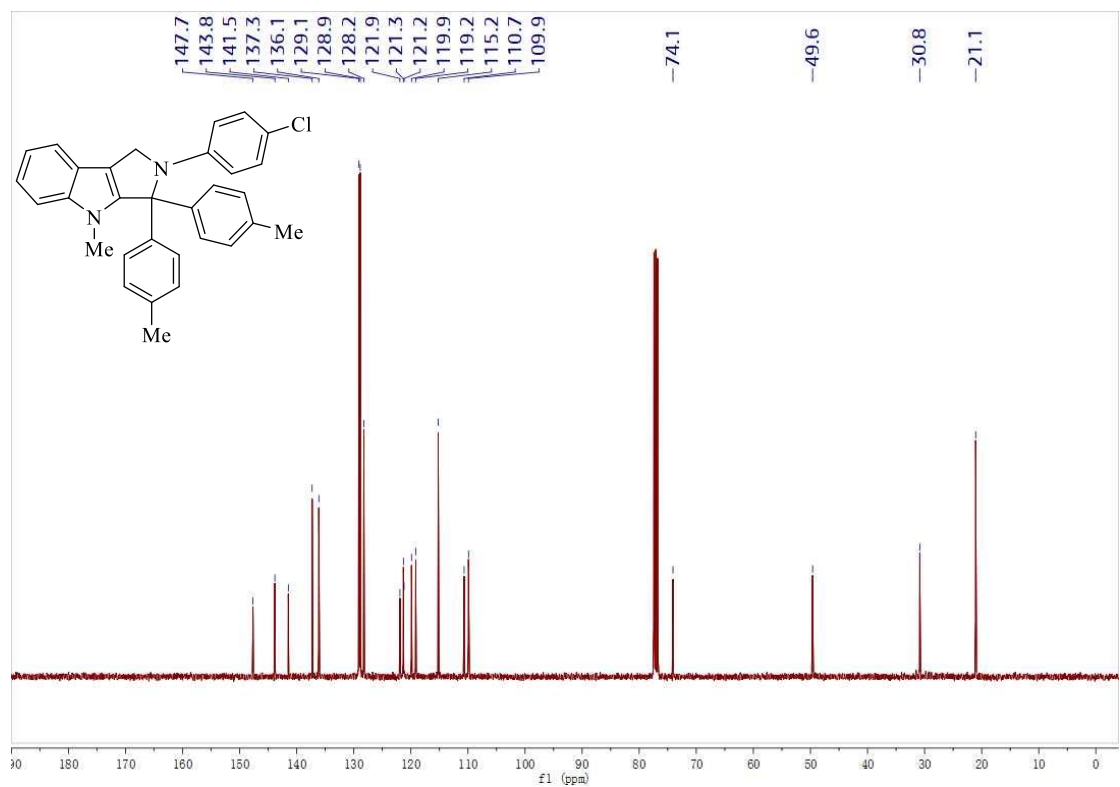

**5g'** <sup>1</sup>H NMR (400 MHz, CDCl<sub>3</sub>)

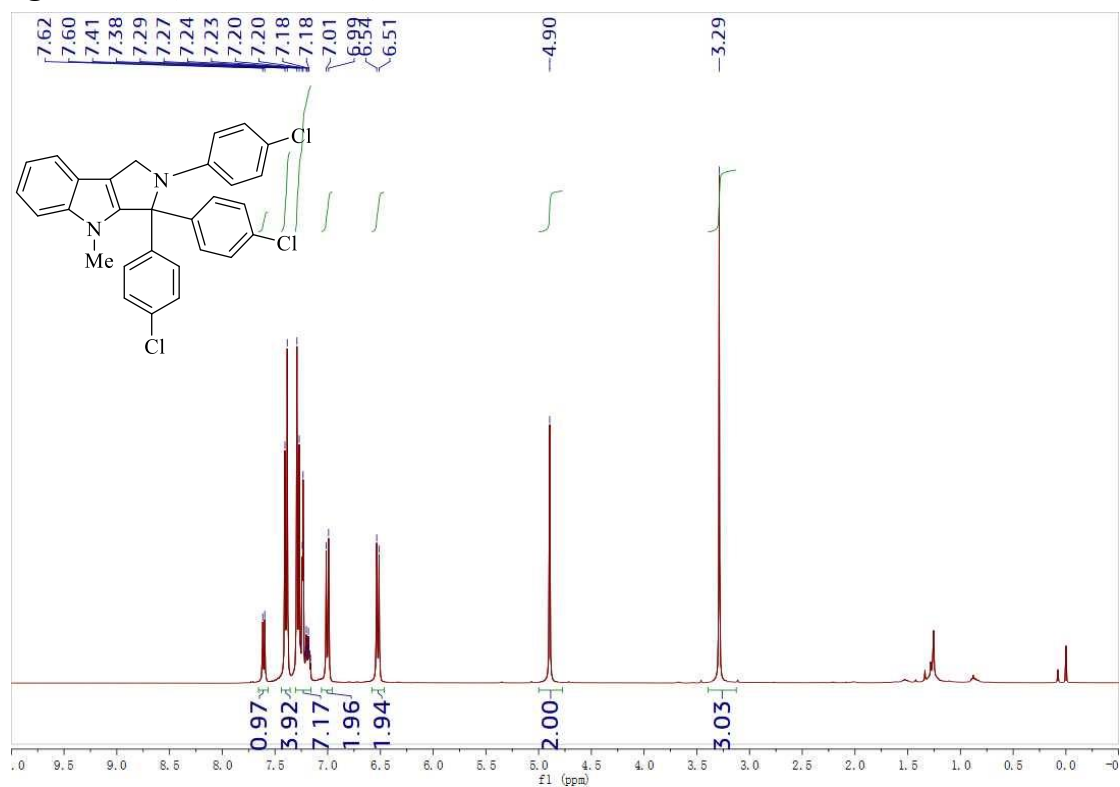

**5g'** <sup>13</sup>C NMR (100 MHz, CDCl<sub>3</sub>)

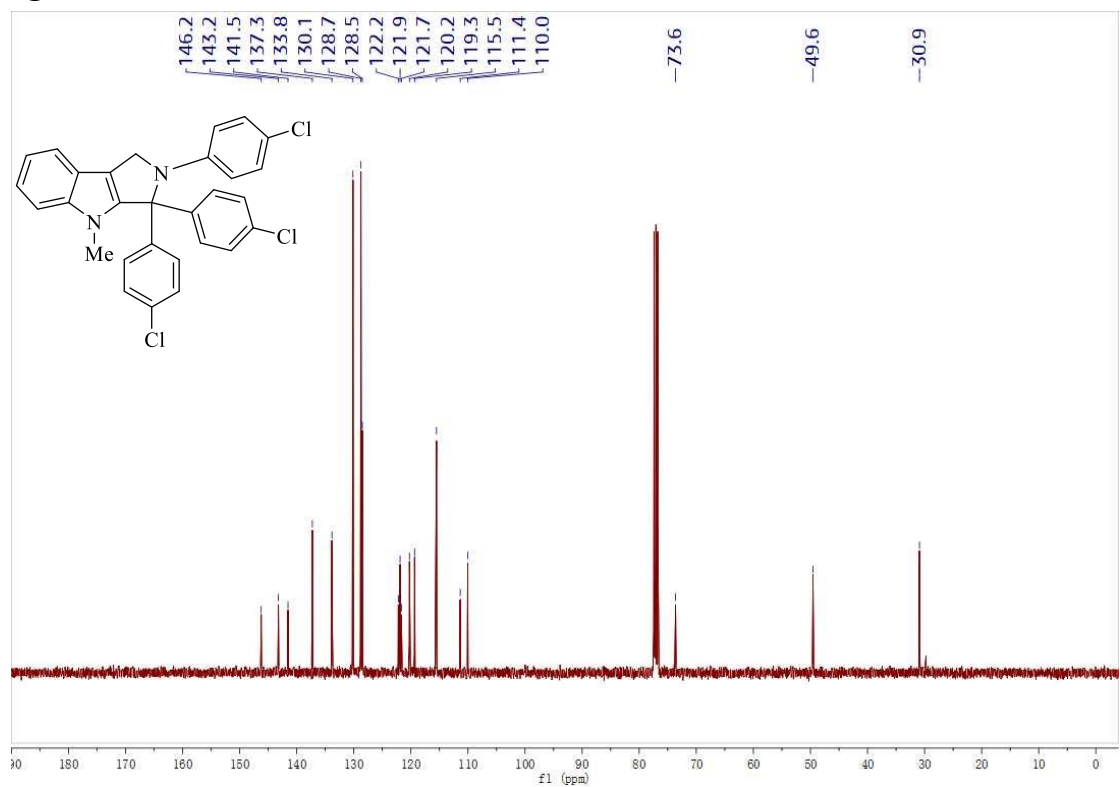

**5h'** <sup>1</sup>H NMR (400 MHz, CDCl<sub>3</sub>)

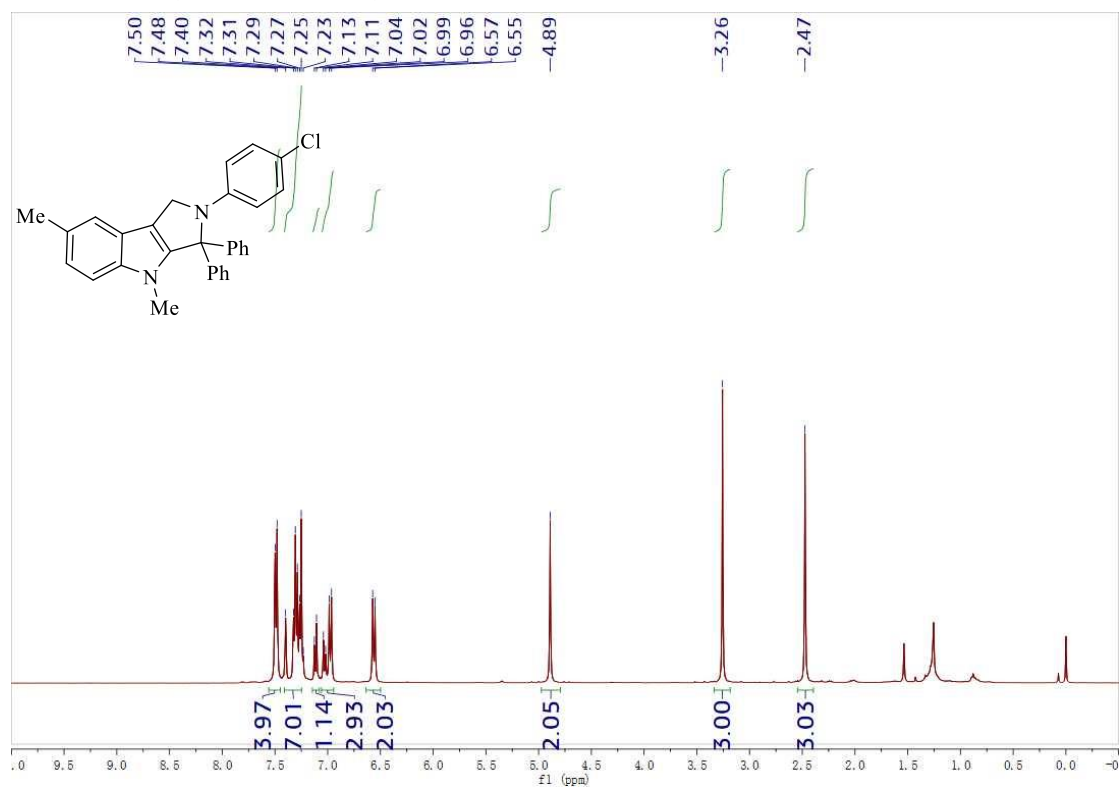

**5h'** <sup>13</sup>C NMR (100 MHz, CDCl<sub>3</sub>)

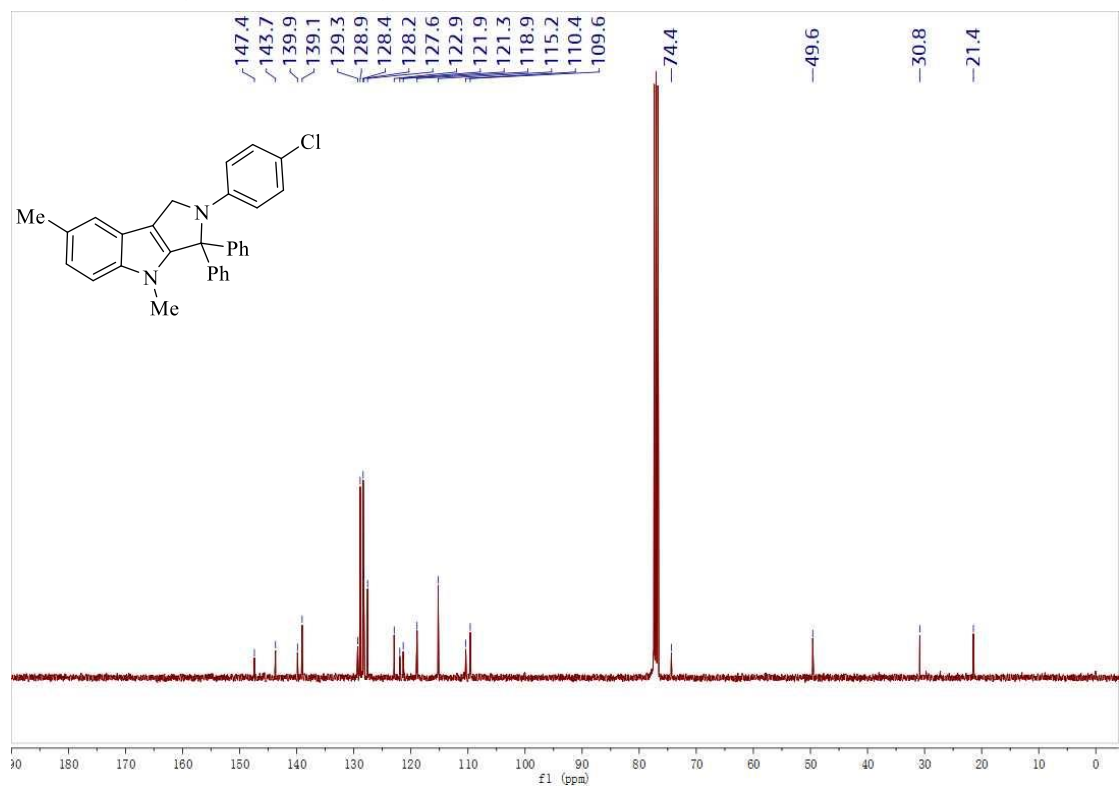



## 6. References

- 1 P. Zheng, S. Wu, C. Mou, W. Xue, Z. Jin, Y. R. Chi, *Org. Lett.*, 2019, **21**, 5026-5029.
- 2 W. Tan, X. Li, Y. X. Gong, M. D. Ge, F. Shi, *Chem. Commun.*, 2014, **50**, 15901-15904.
- 3 Larry D. Bratton, Bruce D. Roth, Bharat K. Trivedi and Paul C. Unangst. *J. Heterocyclic Chem.*, 2000, **37**, 1103.
- 4 T. Z. Li, S. J. Liu, Y. W. Sun, S. Deng, W. Tan, Y. Jiao, Y. C. Zhang, F. Shi, *Angew. Chem. Int. Ed.*, 2021, **60**, 2355-2363.
- 5 P. Ruan, Q. Tang, Z. Yang, X. Liu, X. Feng, *Chem. Commun.*, 2022, **58**, 1001-1004.
